# Supplementary material for: Consecutive cross-dehydrogenative C–O and C–N construction for the synthesis of polyarene with AIE properties under electrochemical condition involving oxygen radical species
Source: Royal Society of Chemistry journal article supplement (doi:10.1039/d3gc00124e), 2023-01-01

# Supporting Information

## **Consecutively Cross-dehydrogenative C-O and C-N Construction for Synthesis of Polyarene with AIE Properties under Electrochemical Condition involving Oxygen Radical Species.**

Zhicheng Zhang,<sup>1</sup> Linzi Wen,<sup>1</sup> Shihai Xu,<sup>1</sup> Yu Tang,<sup>\*1</sup> Xiaohui Cao<sup>\*2</sup> and Pengju Feng<sup>\*1</sup>

1. Department of Chemistry, Guangdong Provincial Key Laboratory of Functional Supramolecular Coordination Materials and Applications, Jinan University, Guangzhou, 510632, China

2. School of Pharmacy, Guangdong Pharmaceutical University, Guangzhou 510006, China

\* Corresponding author.

Yu Tang Email: tytang@jnu.edu.cn;

Xiaohui Cao Email: nkallwar@126.com;

Pengju Feng Email: pfeng@jnu.edu.cn;

## 1. Materials and Methods:

All commercially available reagents were used without further purification. Analytical grade solvents were bought from Energy Chemical Co., LTD and used without processed. The reactions were carried out under constant cell potential (otherwise noted), an ambient atmosphere, magnetically stirred, and monitored by thin layer chromatography (TLC), visualized by fluorescence quenching under UV light. Flash chromatography was performed on silica gel (200-300 mesh). Cyclic voltammograms were recorded on a CHI 660E potentiostat. The UV spectrum was recorder on a UV-visible absorption instrument (Model: FLA4000, Version: VER 6.0). The instrument for electrolysis is dual display potentiostat (DJS-292B) (made in China). The Both anode electrode and cathode electrode are platinum plate electrodes (10 mm×10 mm×0.1 mm or 30 mm×30 mm×0.1 mm). All deuterated solvents were purchased from Meryer (Shanghai) chemical technology Co., LTD. NMR spectra were recorded on a Bruker Ascend 300 spectrometer operating at 300 MHz for <sup>1</sup>H acquisitions, 75 MHz for <sup>13</sup>C acquisitions and 282 MHz for <sup>19</sup>F acquisitions. Chemical shifts were referenced to the residual proton solvent peaks (<sup>1</sup>H: CDCl<sub>3</sub>, δ 7.26; (CD<sub>3</sub>)<sub>2</sub>SO, δ 2.50; CD<sub>3</sub>OD, δ 3.31; CD<sub>3</sub>CN, δ 1.94), solvent <sup>13</sup>C signals (CDCl<sub>3</sub>, δ 77.16; (CD<sub>3</sub>)<sub>2</sub>SO, δ 39.52; CD<sub>3</sub>OD, δ 49.00), dissolved or external neat PhCF<sub>3</sub> (<sup>19</sup>F, δ -63.3 relative to CFCF<sub>3</sub>). Signals are listed in ppm, and multiplicity identified as s = singlet, br = broad, d = doublet, t = triplet, q = quartet, m = multiplet; coupling constants in Hz; integration. High-resolution mass spectra were obtained using Agilent LC-UV-TOF mass spectrometer. Yields refer to purified and spectroscopically pure compounds. All the calculations in this study were performed with Gaussian09 D.01.<sup>1</sup> The structures were optimized by the density functional theory (DFT) with (U)B3LYP<sup>2</sup>-D3<sup>3,4</sup> functional with basis set def2-SVP<sup>5</sup> using SMD<sup>6</sup> continuum solvent model (solvent =HFIP, using the parameters of 2-propanol, except for  $\epsilon$  set at the HFIP value of 16.7<sup>7</sup>) . Frequency analyses (at 298.15 K and 1 atm) were carried out to confirm that each structure is a local minimum (no imaginary frequency) or a transition state (only one imaginary frequency). All transition states were confirmed by intrinsic reaction coordinate (IRC) calculations were performed to confirm the connection between two correct minima for a transition state. In order to get more accurate electronic energies, the single point energy were calculated at the M06-2x<sup>8</sup>-D3 /def2-TZVP level of theory. The solvation effect of HFIP (using the parameters of 2-propanol, except for  $\epsilon$  set at the HFIP value of 16.7) was simulated by SMD continuum solvent model at the M06-2x-D3 /def2-TZVP level of theory.

## 2. Information for reaction set up:

### 2.1. Small scale reaction:

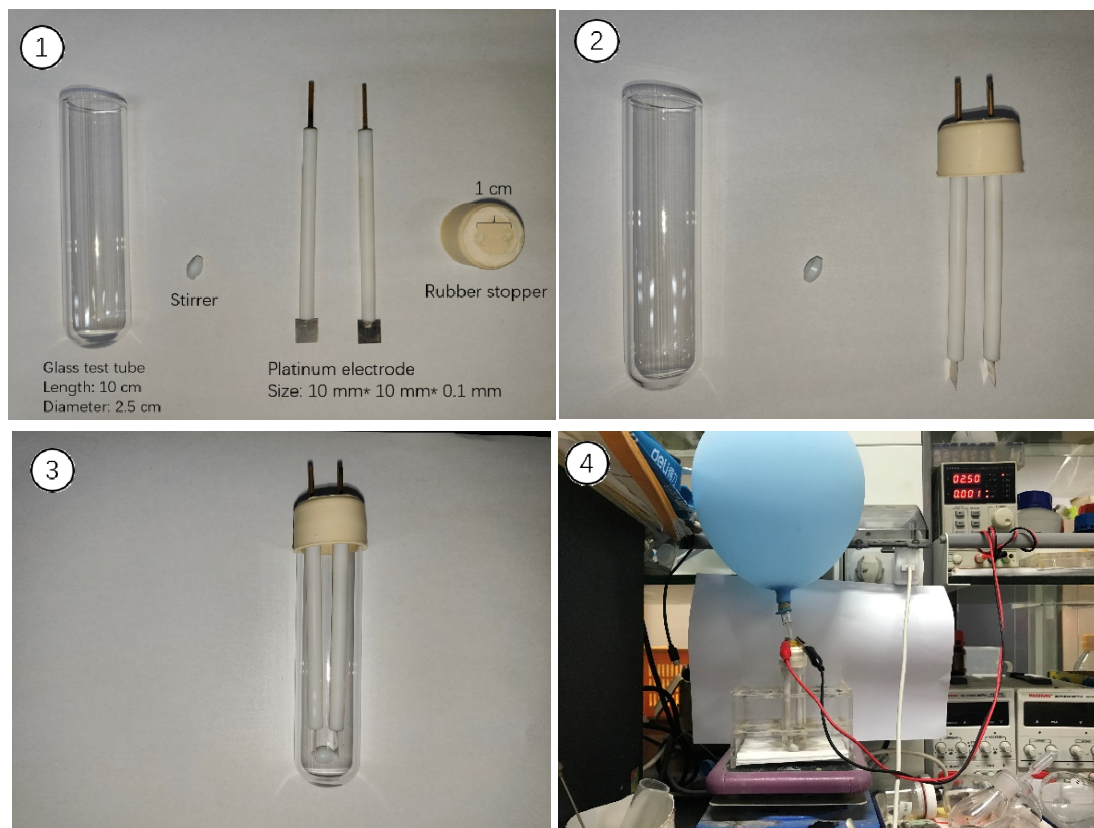

The detail process for home-made electrolysis equipment: 1) Prepare the materials in picture 1 according to the specific information displayed. 2) push the electrode to pass through the rubber stopper and set the distance between the two platinum sheet in 1.2 cm as shown in picture 2. 3) using the rubber stopper to cap on the glass test tube as in picture 3. 4) the reaction set-up was shown in picture 4.

### 2.2. Large scale reaction:

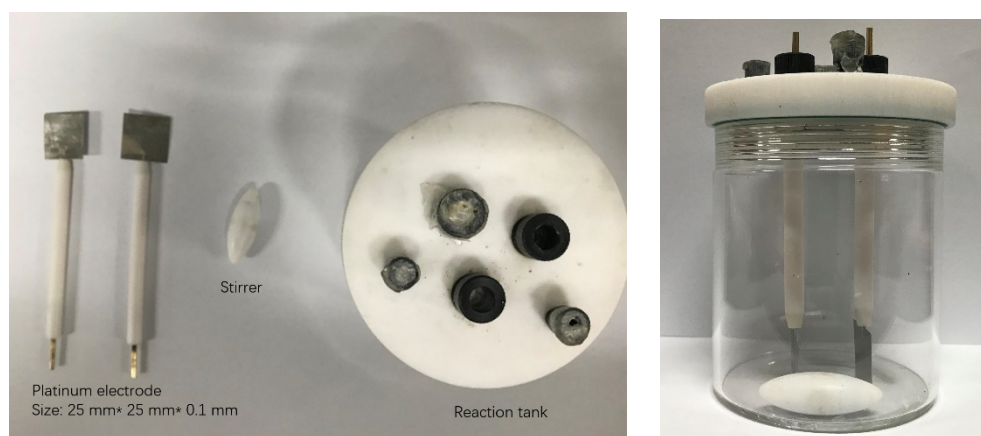

The large scale reaction setup was using the commercially available equipment bought in Stony-lab ([stonyLab.com](http://stonyLab.com)).

### 3. General Procedure for Electro-oxidative Azolation

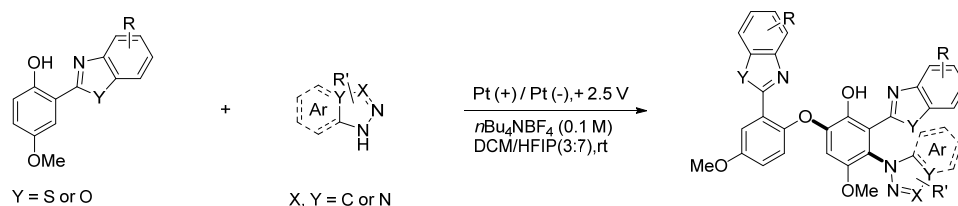

A solution of *phenols* (**1**) (0.25 mmol), *azoles* (**2**) (0.25 mmol) and  $n\text{Bu}_4\text{NBF}_4$  (0.5 mmol) in HFIP/DCM = 7/3 (5 mL) was stirred at room temperature in a test tube which was equipped with platinum plate electrodes (1.0 cm×1.0 cm×0.1 mm) as both the anode and cathode. The reaction mixture was stirred and electrolyzed at a constant cell potential of 2.5 V until the disappearance of **1** (detected by TLC plate under UV lamp) about 7 hours. The electricity was firstly disconnected and the electrode was removed from the test tube before rinsing twice with EtOAc. The reaction mixture was transformed to round bottom flask and was directly concentrated *in vacuo*. The residue was purified by chromatography on silica gel, eluting with Petroleum ether (PE):EtOAc (EA), to afford pure product.

### 4. Further investigation about this electrochemical transformation.

Table S1 Optimization of Reaction Conditions

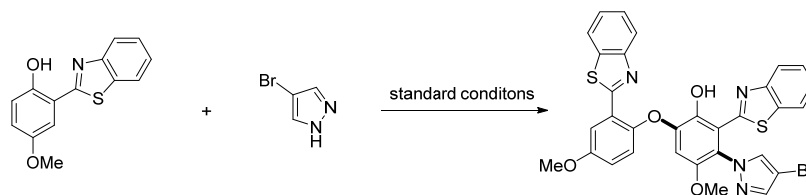

| Entry | Variation from standard conditions | Yield(%) |
|-------|------------------------------------|----------|
| 1     | RVC(+)/Pt(-)                       | 86       |
| 2     | Ni(+)/Pt(-)                        | 0        |
| 3     | Pt(+)/Fe(-)                        | 77       |
| 4     | Pt(+)/C Cloth(-)                   | 0        |

Replacing the anode or cathode materials was found crucial for achieving a sufficient consecutive coupling transformation.

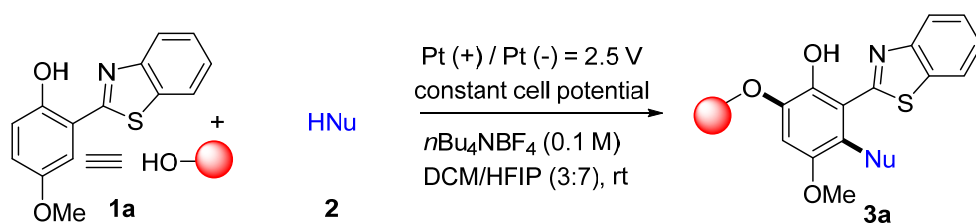

HNu:

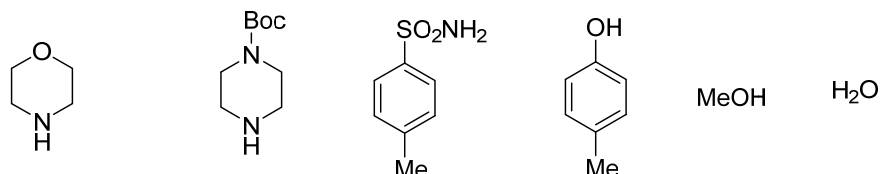

Scheme S1 Tested other Nucleophile for this electrochemical transformation.

We also explored the reaction with sulfonamide, morpholine and other nucleophiles. Unfortunately, no desired product was obtained.

## 5. Procedure for synthesis of compound 4

A solution of 2-(benzo[d]thiazol-2-yl)-4-methoxyphenol (**1a**) (0.25 mmol), and  $n\text{Bu}_4\text{NBF}_4$  (0.5 mmol) in HFIP/DCM = 7/3 (5 mL) was stirred at room temperature in a test tube which was equipped with platinum plate electrodes (1.0 cm×1.0 cm×0.1 mm) as both the anode and cathode. The reaction mixture was stirred and electrolyzed at a constant cell potential of 2.5 V about 2.5 h. Compound **1a** was still left a lot in the mixed solvent (detected by TLC plate under UV lamp). We found that compound **4** will be over-oxidized if electrolysis is not stopped. The electricity was firstly disconnected and the electrode was removed from the test tube before rinsing twice with EtOAc. The reaction mixture was transferred to round bottom flask and was directly concentrated *in vacuo*. The residue was purified by chromatography on silica gel, eluting with Petroleum ether (PE):EtOAc (EA), to afford pure product **4** as a yellow solid in 45% yield.

## 6. Procedure for Gram Scale Synthesis

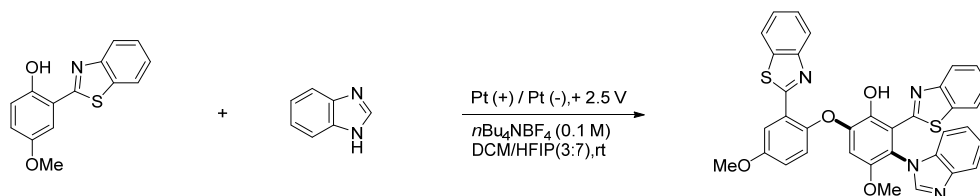

A solution of 2-(benzo[d]thiazol-2-yl)-4-methoxyphenol (1.03g, 4.0 mmol), 1H-benzo[d]imidazole (0.47g, 4.0 mmol) and  $n\text{Bu}_4\text{NBF}_4$  (1.0 g, 3.04 mmol) in HFIP/DCM = 7/3 (20 mL) was stirred at room temperature in a test tube which was equipped with platinum plate electrodes (30 mm×30 mm×0.1 mm) as both the anode and cathode. A balloon was connected to the electrolytic cell for collecting  $\text{H}_2$ . The

reaction mixture was stirred and electrolyzed at a constant cell potential of 2.5 V until the disappearance of 2-(benzo[d]thiazol-2-yl)-4-methoxyphenol (detected by TLC plate under UV lamp). The reaction mixture was directly concentrated *in vacuo*. The residue was purified by chromatography on silica gel, eluting with Petroleum ether: EtOAc, to afford pure the title product as yellow solid (1.27 g, 99%).

## 7. Cyclic voltammetry studies

Cyclic voltammograms were recorded on a CHI 660E potentiostat. The cyclic voltammograms of compounds **1a** (SM1), **2j** (SM2), **3j** and **4** were recorded in an electrolyte of *n*Bu<sub>4</sub>NBF<sub>4</sub> (0.1 M) in HFIP/DCM (7:3) using a Pt working electrode (diameter, 2 mm), a Pt wire auxiliary electrode and a SCE reference electrode. The scan rate is 100 mV/s (T = 20 °C, c = 0.01M).

The structure of **1a**, **2j**, **3j** and **4**

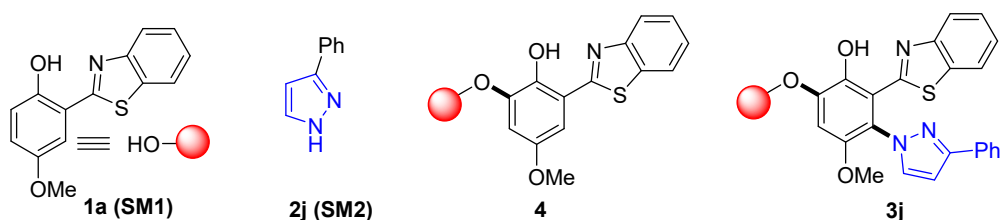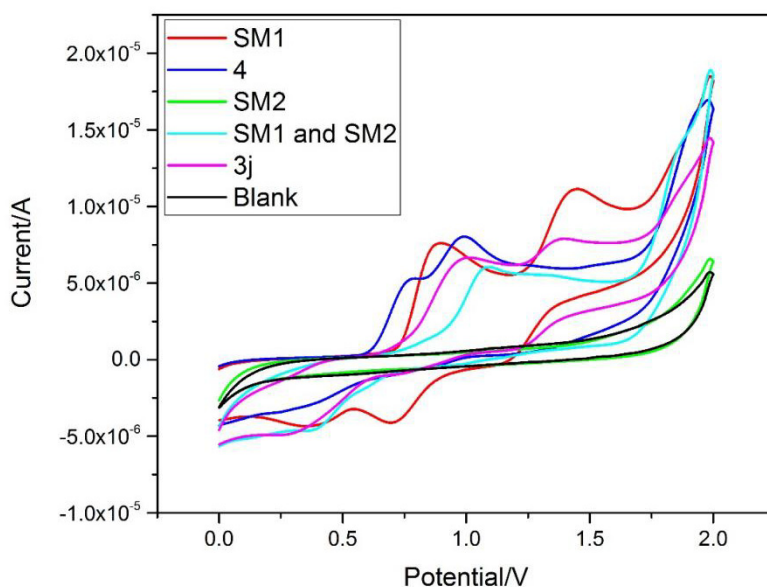

Figure S1 Cyclic voltammetry studies of selected compounds

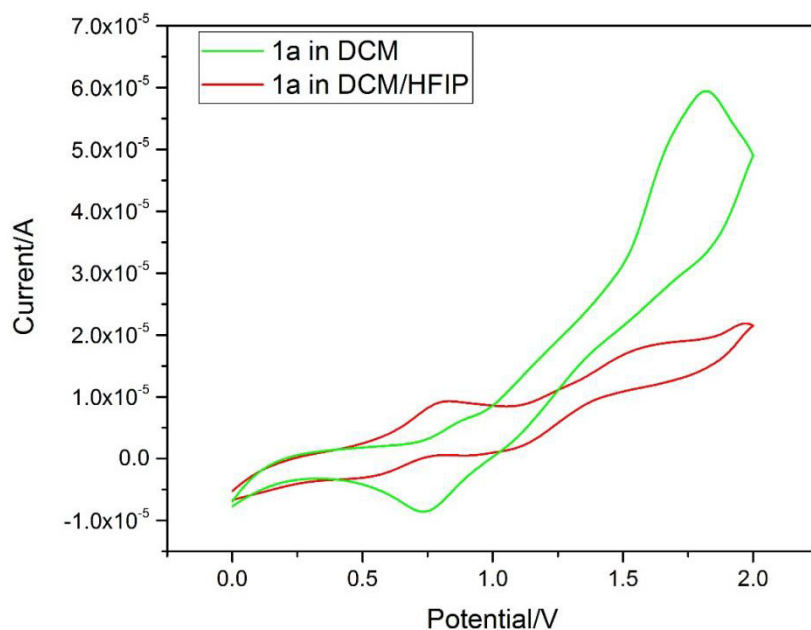

Figure S2 Cyclic voltammetry studies of effect of HFIP

## 8. Radical capture experiment

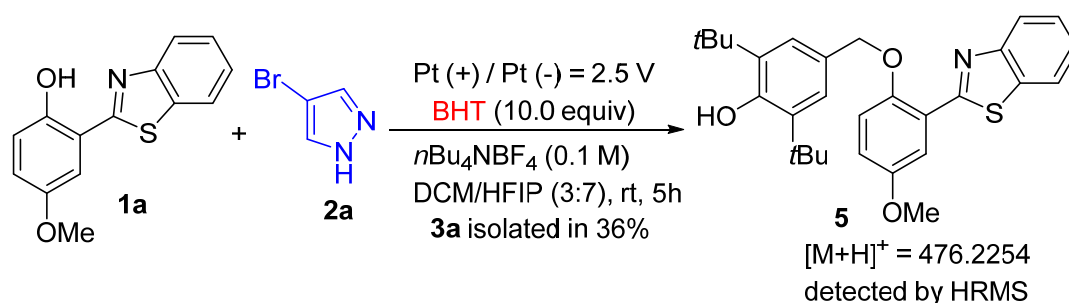

A solution of 2-(benzo[d]thiazol-2-yl)-4-methoxyphenol (64.3 mg, 0.25 mmol), 2,6-di-tert-butyl-4-methylphenol **1a** (275.2 mg, 1.25 mmol), bromopyrrole **2a** (36.7 mg, 0.25 mmol) and  $n\text{Bu}_4\text{NBF}_4$  (165 mg, 0.5 mmol) in HFIP/DCM = 7/3 (5 mL) was stirred at room temperature in a test tube which was equipped with platinum plate electrodes (10 mm×10 mm×0.1 mm) as both the anode and cathode. The reaction mixture was stirred and electrolyzed at a constant cell potential of 2.5 V for about 5 hours. The reaction solution was directly draw with a syringe and dilute with methanol. The diluted solution was injected to High resolution liquid chromatography mass spectrometry. Compound **5** was detected by HRMS. We also did CV study about BHT and we found it show higher oxidation potential than the starting materials.

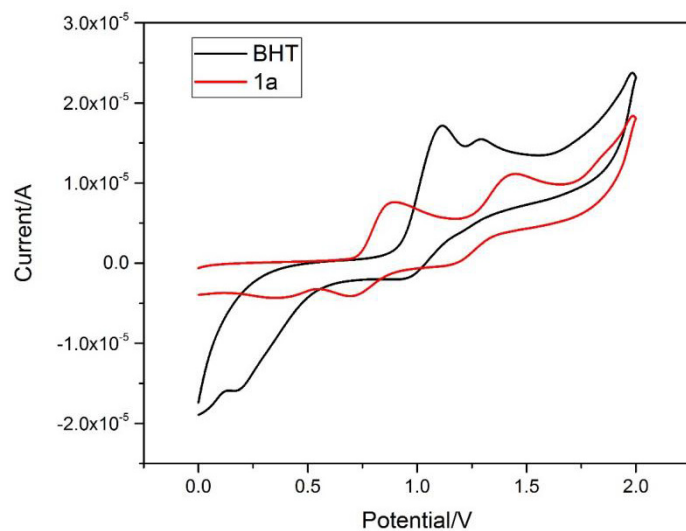

Figure S3 Cyclic voltametry studies of BHT and **1a**

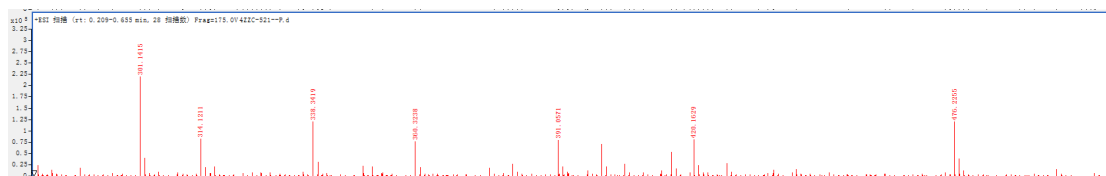

Figure S4 HRMS of compound **5**

## 9. Computational details

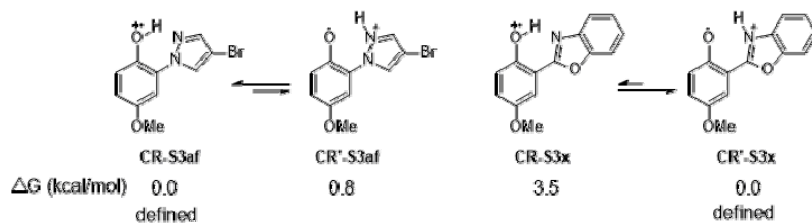

Scheme S2 the corresponding structures for calculation.

Table S2. Calculated energy data and imaginary frequencies for all structure.

|                 | Energy (au)                 | Thermal correction to Enthalpy (au) | Thermal correction to Gibbs Free Energy (au) | Imaginary frequency (cm <sup>-1</sup> ) |
|-----------------|-----------------------------|-------------------------------------|----------------------------------------------|-----------------------------------------|
|                 | (U)M06-2x-D3 /def2-TZVP/SMD | (U)B3LYP-D3 /def2-SVP/SMD           | (U)B3LYP-D3 /def2-SVP/SMD                    | (U)B3LYP-D3 /def2-SVP/SMD               |
| <b>CR-S3x</b>   | -820.334926                 | 0.238786                            | 0.182779                                     | None                                    |
| <b>CR'-S3x</b>  | -820.340569                 | 0.239364                            | 0.182800                                     | None                                    |
| <b>CR-S3af</b>  | -3220.393027                | 0.191947                            | 0.138885                                     | None                                    |
| <b>CR'-S3af</b> | -3220.391695                | 0.191916                            | 0.138789                                     | None                                    |
| <b>Pyrazol</b>  | -226.204388                 | 0.075993                            | 0.045155                                     | None                                    |



|                      |              |          |          |         |
|----------------------|--------------|----------|----------|---------|
| <b>S3x</b>           | -820.544937  | 0.238621 | 0.181923 | None    |
| <b>TS-S3x-pyr</b>    | -1046.527126 | 0.315933 | 0.248059 | -329.30 |
| <b>TS'-S3x-pyr</b>   | -1046.526359 | 0.315708 | 0.247607 | -283.04 |
| <b>TS-S3af-pyr</b>   | -3446.581868 | 0.269773 | 0.20298  | -323.97 |
| <b>TS-S3x-OC</b>     | -1640.68117  | 0.480476 | 0.393385 | -273.15 |
| <b>TS-S3x-CC</b>     | -1640.673057 | 0.480735 | 0.389531 | -245.79 |
| <b>TS-S3x-CR-Sub</b> | -1640.858689 | 0.478238 | 0.386149 | -375.32 |
| <b>TS-S3af-OC</b>    | -6440.780306 | 0.388632 | 0.304183 | -339.75 |
| <b>TS'-S3af-OC</b>   | -6440.772798 | 0.387282 | 0.301272 | -423.24 |
| <b>TS-S3af-CC</b>    | -6440.774223 | 0.388866 | 0.301426 | -325.89 |

**Table S3.** Calculated spin populations

|          | O1       | C2        | C3       | C5       | O8       |
|----------|----------|-----------|----------|----------|----------|
| CR-S3x   | 0.160028 | 0.227554  | 0.065545 | 0.247669 | 0.164111 |
| CR'-S3x  | 0.254375 | -0.012449 | 0.223829 | 0.304585 | 0.132333 |
| CR-S3af  | 0.178901 | 0.258505  | 0.035044 | 0.239552 | 0.140669 |
| CR'-S3af | 0.277759 | 0.059546  | 0.172797 | 0.296995 | 0.120983 |

**Figure S5** The optimized structures and calculated Mulliken spin population for the radical cations.

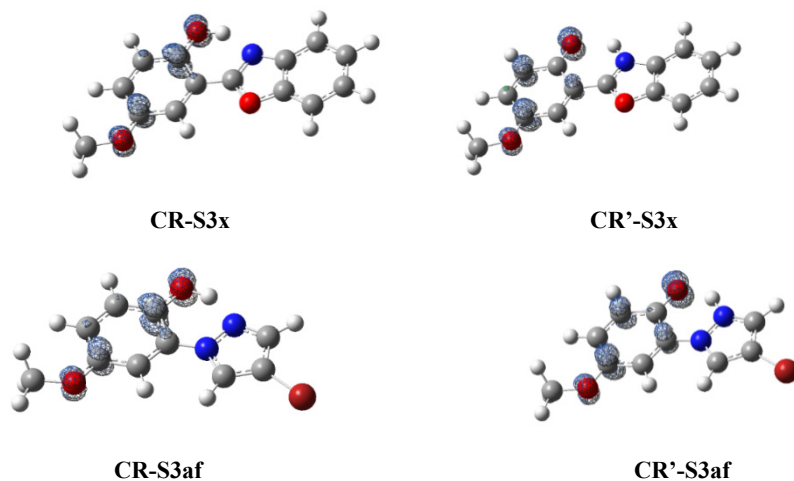

**Figure S6** Structure and Relative Free Energies of Cationic Radicals and Transition states.

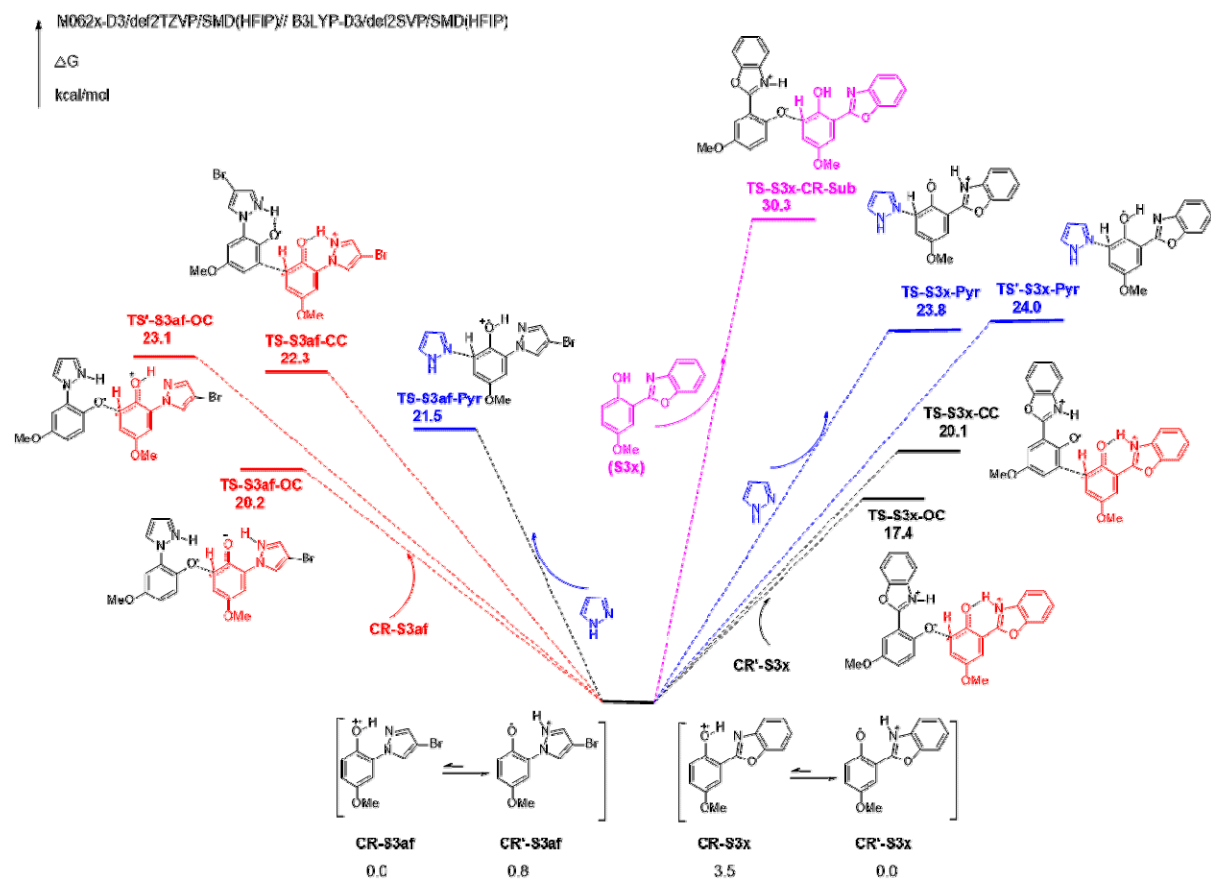

## Cartesian coordinates for all calculated structure

CR-S3x

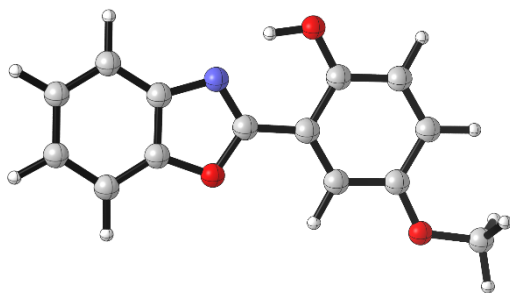

| Center Number | Atomic Number | Atomic Type | Coordinates (Angstroms) |   |   |
|---------------|---------------|-------------|-------------------------|---|---|
|               |               |             | X                       | Y | Z |

|    |   |   |           |           |           |
|----|---|---|-----------|-----------|-----------|
| 1  | 6 | 0 | 3.672728  | 0.776040  | 0.000039  |
| 2  | 6 | 0 | 2.804286  | 1.836194  | 0.000019  |
| 3  | 6 | 0 | 1.392190  | 1.625248  | -0.000022 |
| 4  | 6 | 0 | 0.875247  | 0.268910  | -0.000023 |
| 5  | 6 | 0 | 1.755435  | -0.792513 | -0.000015 |
| 6  | 6 | 0 | 3.159813  | -0.560350 | 0.000016  |
| 7  | 1 | 0 | 4.747741  | 0.954397  | 0.000066  |
| 8  | 1 | 0 | 3.162583  | 2.867076  | 0.000023  |
| 9  | 1 | 0 | 1.399161  | -1.823567 | -0.000020 |
| 10 | 8 | 0 | 0.607460  | 2.664189  | -0.000085 |
| 11 | 1 | 0 | -0.367483 | 2.356372  | -0.000163 |
| 12 | 8 | 0 | 3.910826  | -1.638590 | 0.000028  |
| 13 | 6 | 0 | 5.348344  | -1.566569 | 0.000061  |
| 14 | 1 | 0 | 5.702443  | -1.049273 | 0.904682  |
| 15 | 1 | 0 | 5.693872  | -2.606627 | 0.000067  |
| 16 | 1 | 0 | 5.702483  | -1.049271 | -0.904544 |
| 17 | 6 | 0 | -0.563366 | 0.099562  | -0.000018 |
| 18 | 6 | 0 | -2.477685 | -0.901183 | -0.000028 |
| 19 | 6 | 0 | -2.673035 | 0.493473  | 0.000026  |
| 20 | 6 | 0 | -3.512264 | -1.826532 | -0.000054 |
| 21 | 6 | 0 | -3.969777 | 1.025723  | 0.000061  |
| 22 | 6 | 0 | -4.800580 | -1.282883 | -0.000021 |
| 23 | 1 | 0 | -3.327084 | -2.901619 | -0.000098 |
| 24 | 6 | 0 | -5.023506 | 0.112779  | 0.000035  |
| 25 | 1 | 0 | -4.137613 | 2.104169  | 0.000104  |
| 26 | 1 | 0 | -5.659890 | -1.957801 | -0.000040 |
| 27 | 1 | 0 | -6.051532 | 0.482755  | 0.000060  |
| 28 | 7 | 0 | -1.421364 | 1.087526  | 0.000035  |
| 29 | 8 | 0 | -1.123550 | -1.130187 | -0.000048 |

CR<sup>2</sup>-S3x

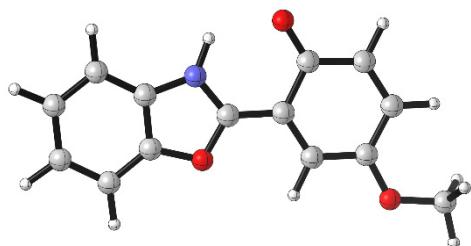

| Center Number | Atomic Number | Atomic Type | Coordinates (Angstroms) |           |           |
|---------------|---------------|-------------|-------------------------|-----------|-----------|
|               |               |             | X                       | Y         | Z         |
| 1             | 6             | 0           | 3.701926                | 0.745476  | 0.000042  |
| 2             | 6             | 0           | 2.872259                | 1.835511  | 0.000071  |
| 3             | 6             | 0           | 1.423043                | 1.713089  | -0.000023 |
| 4             | 6             | 0           | 0.893625                | 0.337227  | -0.000018 |
| 5             | 6             | 0           | 1.743887                | -0.755249 | -0.000034 |
| 6             | 6             | 0           | 3.149773                | -0.571835 | -0.000021 |
| 7             | 1             | 0           | 4.782971                | 0.887055  | 0.000083  |
| 8             | 1             | 0           | 3.274571                | 2.850871  | 0.000148  |
| 9             | 1             | 0           | 1.358411                | -1.776437 | -0.000056 |
| 10            | 8             | 0           | 0.679218                | 2.716079  | 0.000168  |
| 11            | 1             | 0           | -1.194279               | 2.092397  | -0.000095 |
| 12            | 8             | 0           | 3.869154                | -1.683858 | -0.000042 |
| 13            | 6             | 0           | 5.302989                | -1.640390 | -0.000019 |
| 14            | 1             | 0           | 5.674541                | -1.131766 | 0.903472  |
| 15            | 1             | 0           | 5.632505                | -2.686337 | -0.000042 |
| 16            | 1             | 0           | 5.674569                | -1.131717 | -0.903470 |
| 17            | 6             | 0           | -0.530444               | 0.152015  | -0.000019 |
| 18            | 6             | 0           | -2.462428               | -0.873399 | -0.000002 |
| 19            | 6             | 0           | -2.717969               | 0.503396  | -0.000039 |
| 20            | 6             | 0           | -3.459485               | -1.836469 | 0.000025  |
| 21            | 6             | 0           | -4.022080               | 0.999733  | -0.000056 |
| 22            | 6             | 0           | -4.767110               | -1.340217 | 0.000013  |
| 23            | 1             | 0           | -3.231151               | -2.902951 | 0.000055  |
| 24            | 6             | 0           | -5.040252               | 0.044295  | -0.000027 |
| 25            | 1             | 0           | -4.226320               | 2.071206  | -0.000087 |
| 26            | 1             | 0           | -5.600444               | -2.046490 | 0.000034  |
| 27            | 1             | 0           | -6.080263               | 0.378267  | -0.000037 |
| 28            | 7             | 0           | -1.462566               | 1.099131  | -0.000054 |
| 29            | 8             | 0           | -1.092564               | -1.054360 | 0.000001  |

CR-S3af

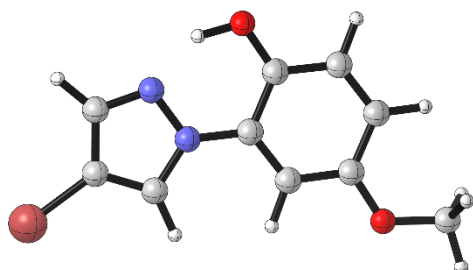

| Center<br>Number | Atomic<br>Number | Atomic<br>Type | Coordinates (Angstroms) |           |           |
|------------------|------------------|----------------|-------------------------|-----------|-----------|
|                  |                  |                | X                       | Y         | Z         |
| 1                | 6                | 0              | 3.972125                | 0.419477  | 0.000010  |
| 2                | 6                | 0              | 3.309041                | 1.617075  | -0.000243 |
| 3                | 6                | 0              | 1.883497                | 1.681533  | -0.000248 |
| 4                | 6                | 0              | 1.121551                | 0.441177  | 0.000064  |
| 5                | 6                | 0              | 1.794763                | -0.760554 | 0.000272  |
| 6                | 6                | 0              | 3.213736                | -0.793167 | 0.000225  |
| 7                | 1                | 0              | 5.061134                | 0.395090  | 0.000016  |
| 8                | 1                | 0              | 3.846419                | 2.567113  | -0.000445 |
| 9                | 1                | 0              | 1.274020                | -1.717798 | 0.000544  |
| 10               | 8                | 0              | 1.323656                | 2.858052  | -0.000605 |
| 11               | 8                | 0              | 3.748793                | -1.994729 | 0.000408  |
| 12               | 6                | 0              | 5.174088                | -2.190052 | 0.000373  |
| 13               | 1                | 0              | 5.620816                | -1.751047 | 0.905223  |
| 14               | 1                | 0              | 5.320888                | -3.276435 | 0.000464  |
| 15               | 1                | 0              | 5.620752                | -1.751204 | -0.904584 |
| 16               | 6                | 0              | -2.434728               | 0.056915  | 0.000074  |
| 17               | 6                | 0              | -2.208601               | 1.459347  | 0.000947  |
| 18               | 7                | 0              | -0.911541               | 1.702585  | 0.001094  |
| 19               | 7                | 0              | -0.282438               | 0.496130  | 0.000185  |
| 20               | 6                | 0              | -1.186876               | -0.531015 | -0.000368 |
| 21               | 1                | 0              | -2.935342               | 2.271262  | 0.001505  |
| 22               | 1                | 0              | -0.892968               | -1.576400 | -0.001103 |
| 23               | 35               | 0              | -4.093541               | -0.816966 | -0.000434 |
| 24               | 1                | 0              | 0.304908                | 2.731245  | -0.000443 |

CR<sup>2</sup>-S3af

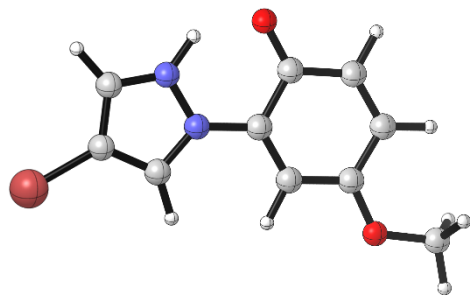

| Center Number | Atomic Number | Atomic Type | Coordinates (Angstroms) |           |           |
|---------------|---------------|-------------|-------------------------|-----------|-----------|
|               |               |             | X                       | Y         | Z         |
| 1             | 6             | 0           | -3.983959               | 0.423578  | 0.000050  |
| 2             | 6             | 0           | -3.326878               | 1.626605  | 0.000105  |
| 3             | 6             | 0           | -1.884240               | 1.730119  | 0.000155  |
| 4             | 6             | 0           | -1.148500               | 0.458291  | 0.000044  |
| 5             | 6             | 0           | -1.809801               | -0.746759 | -0.000018 |
| 6             | 6             | 0           | -3.229257               | -0.783808 | 0.000006  |
| 7             | 1             | 0           | -5.073357               | 0.395735  | 0.000033  |
| 8             | 1             | 0           | -3.874966               | 2.571130  | 0.000118  |
| 9             | 1             | 0           | -1.287033               | -1.703662 | -0.000087 |
| 10            | 8             | 0           | -1.308072               | 2.850845  | 0.000101  |
| 11            | 8             | 0           | -3.759444               | -1.997463 | -0.000038 |
| 12            | 6             | 0           | -5.181121               | -2.184225 | 0.000011  |
| 13            | 1             | 0           | -5.631605               | -1.744748 | -0.903643 |
| 14            | 1             | 0           | -5.337874               | -3.269813 | 0.000004  |
| 15            | 1             | 0           | -5.631539               | -1.744768 | 0.903708  |
| 16            | 6             | 0           | 2.442924                | 0.069342  | -0.000041 |
| 17            | 6             | 0           | 2.245345                | 1.459467  | -0.000036 |
| 18            | 7             | 0           | 0.932738                | 1.672861  | -0.000025 |
| 19            | 7             | 0           | 0.270152                | 0.495707  | 0.000010  |
| 20            | 6             | 0           | 1.178928                | -0.511200 | 0.000002  |
| 21            | 1             | 0           | 2.953811                | 2.286482  | -0.000038 |
| 22            | 1             | 0           | 0.883241                | -1.556346 | 0.000029  |
| 23            | 35            | 0           | 4.085423                | -0.828968 | -0.000064 |
| 24            | 1             | 0           | 0.308781                | 2.524379  | 0.000059  |

Pyrazol

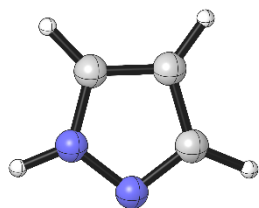


---

| Center<br>Number | Atomic<br>Number | Atomic<br>Type | Coordinates (Angstroms) |           |           |
|------------------|------------------|----------------|-------------------------|-----------|-----------|
|                  |                  |                | X                       | Y         | Z         |
| 1                | 6                | 0              | 0.679925                | 0.929547  | -0.000064 |
| 2                | 6                | 0              | -0.706373               | 0.974087  | 0.000143  |
| 3                | 6                | 0              | -1.099261               | -0.386825 | -0.000162 |
| 4                | 7                | 0              | 1.017505                | -0.383337 | -0.000048 |
| 5                | 1                | 0              | 1.956838                | -0.772972 | -0.000098 |
| 6                | 1                | 0              | 1.435222                | 1.714008  | -0.000101 |
| 7                | 1                | 0              | -1.340093               | 1.859048  | 0.000272  |
| 8                | 1                | 0              | -2.109477               | -0.798975 | -0.000211 |
| 9                | 7                | 0              | -0.044397               | -1.202659 | 0.000139  |

---

S3x

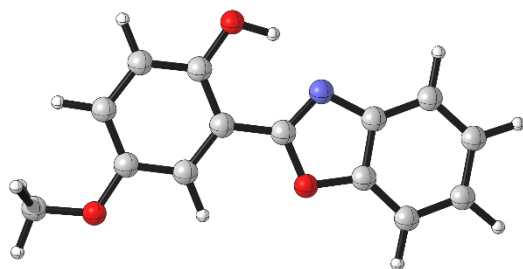


---

| Center<br>Number | Atomic<br>Number | Atomic<br>Type | Coordinates (Angstroms) |          |           |
|------------------|------------------|----------------|-------------------------|----------|-----------|
|                  |                  |                | X                       | Y        | Z         |
| 1                | 6                | 0              | 3.657236                | 0.718010 | -0.000085 |
| 2                | 6                | 0              | 2.805061                | 1.822351 | -0.000054 |

---

|    |   |   |           |           |           |
|----|---|---|-----------|-----------|-----------|
| 3  | 6 | 0 | 1.412280  | 1.669890  | 0.000075  |
| 4  | 6 | 0 | 0.879425  | 0.349887  | 0.000108  |
| 5  | 6 | 0 | 1.743891  | -0.759082 | 0.000100  |
| 6  | 6 | 0 | 3.129320  | -0.587761 | 0.000006  |
| 7  | 1 | 0 | 4.734626  | 0.885442  | -0.000159 |
| 8  | 1 | 0 | 3.213450  | 2.835513  | -0.000075 |
| 9  | 1 | 0 | 1.336276  | -1.771178 | 0.000126  |
| 10 | 8 | 0 | 0.636449  | 2.771242  | 0.000318  |
| 11 | 1 | 0 | -0.315063 | 2.490643  | 0.000585  |
| 12 | 8 | 0 | 3.880261  | -1.724158 | -0.000016 |
| 13 | 6 | 0 | 5.293943  | -1.615613 | -0.000113 |
| 14 | 1 | 0 | 5.665357  | -1.092709 | 0.899527  |
| 15 | 1 | 0 | 5.684192  | -2.642913 | -0.000111 |
| 16 | 1 | 0 | 5.665238  | -1.092758 | -0.899830 |
| 17 | 6 | 0 | -0.559499 | 0.176949  | 0.000088  |
| 18 | 6 | 0 | -2.450056 | -0.891020 | 0.000063  |
| 19 | 6 | 0 | -2.684843 | 0.495247  | -0.000131 |
| 20 | 6 | 0 | -3.456542 | -1.846845 | 0.000116  |
| 21 | 6 | 0 | -3.997719 | 0.982139  | -0.000288 |
| 22 | 6 | 0 | -4.765064 | -1.347717 | -0.000035 |
| 23 | 1 | 0 | -3.237148 | -2.915937 | 0.000263  |
| 24 | 6 | 0 | -5.028118 | 0.037631  | -0.000233 |
| 25 | 1 | 0 | -4.200236 | 2.055110  | -0.000444 |
| 26 | 1 | 0 | -5.601757 | -2.050803 | -0.000005 |
| 27 | 1 | 0 | -6.066275 | 0.379531  | -0.000351 |
| 28 | 7 | 0 | -1.451631 | 1.135112  | -0.000128 |
| 29 | 8 | 0 | -1.090852 | -1.078349 | 0.000158  |

TS-S3x-pyr

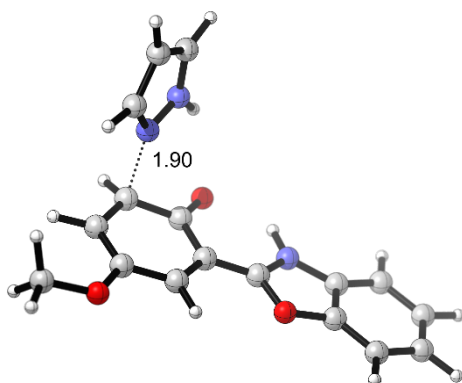



| Center<br>Number | Atomic<br>Number | Atomic<br>Type | Coordinates (Angstroms) |           |           |
|------------------|------------------|----------------|-------------------------|-----------|-----------|
|                  |                  |                | X                       | Y         | Z         |
| 1                | 6                | 0              | -2.798121               | 1.167388  | 0.850380  |
| 2                | 6                | 0              | -2.272288               | -0.093884 | 1.246455  |
| 3                | 6                | 0              | -0.803808               | -0.350569 | 1.168327  |
| 4                | 6                | 0              | -0.029625               | 0.615855  | 0.416372  |
| 5                | 6                | 0              | -0.628795               | 1.774612  | -0.110723 |
| 6                | 6                | 0              | -2.001274               | 2.052236  | 0.125720  |
| 7                | 1                | 0              | -3.835352               | 1.398801  | 1.089340  |
| 8                | 1                | 0              | -2.757505               | -0.611122 | 2.077430  |
| 9                | 1                | 0              | -0.044635               | 2.499230  | -0.679463 |
| 10               | 8                | 0              | -0.332461               | -1.392522 | 1.678753  |
| 11               | 8                | 0              | -2.420146               | 3.231753  | -0.363975 |
| 12               | 6                | 0              | -3.780448               | 3.619584  | -0.201001 |
| 13               | 1                | 0              | -4.030982               | 3.756865  | 0.864544  |
| 14               | 1                | 0              | -3.890328               | 4.578335  | -0.724875 |
| 15               | 1                | 0              | -4.466064               | 2.879430  | -0.647326 |
| 16               | 6                | 0              | 1.356455                | 0.360744  | 0.231335  |
| 17               | 6                | 0              | 3.425914                | 0.635168  | -0.445116 |
| 18               | 6                | 0              | 3.380165                | -0.557376 | 0.286283  |
| 19               | 6                | 0              | 4.581512                | 1.129081  | -1.027728 |
| 20               | 6                | 0              | 4.523458                | -1.331904 | 0.476474  |
| 21               | 6                | 0              | 5.731475                | 0.351510  | -0.839065 |
| 22               | 1                | 0              | 4.586877                | 2.062091  | -1.592836 |
| 23               | 6                | 0              | 5.701140                | -0.849385 | -0.104079 |
| 24               | 1                | 0              | 4.495101                | -2.261410 | 1.046832  |
| 25               | 1                | 0              | 6.675643                | 0.688046  | -1.273283 |
| 26               | 1                | 0              | 6.624290                | -1.420774 | 0.017514  |
| 27               | 7                | 0              | 2.054771                | -0.682913 | 0.688398  |
| 28               | 8                | 0              | 2.155037                | 1.181305  | -0.460970 |
| 29               | 1                | 0              | 1.586940                | -1.410009 | 1.243067  |
| 30               | 6                | 0              | -3.005818               | -3.411766 | -0.924789 |
| 31               | 6                | 0              | -3.817663               | -2.549641 | -1.655399 |
| 32               | 6                | 0              | -3.668454               | -1.291434 | -1.039469 |
| 33               | 7                | 0              | -2.432920               | -2.680913 | 0.054283  |

|    |   |   |           |           |           |
|----|---|---|-----------|-----------|-----------|
| 34 | 1 | 0 | -1.748723 | -2.955845 | 0.761280  |
| 35 | 1 | 0 | -2.795385 | -4.474819 | -1.030556 |
| 36 | 1 | 0 | -4.432637 | -2.796556 | -2.518005 |
| 37 | 1 | 0 | -4.118121 | -0.327735 | -1.277339 |
| 38 | 7 | 0 | -2.826350 | -1.406192 | -0.015632 |

-----

**TS'-S3x-pyr**

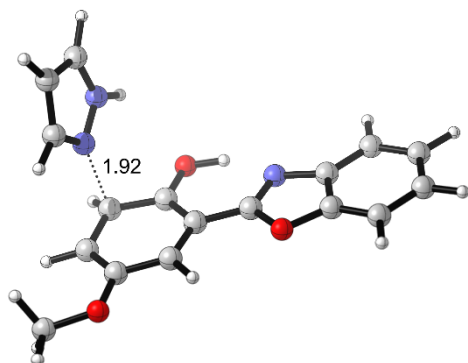

| Center<br>Number | Atomic<br>Number | Atomic<br>Type | Coordinates (Angstroms) |           |           |
|------------------|------------------|----------------|-------------------------|-----------|-----------|
|                  |                  |                | X                       | Y         | Z         |
| 1                | 6                | 0              | -2.811577               | 1.122062  | 0.869141  |
| 2                | 6                | 0              | -2.233938               | -0.116735 | 1.285800  |
| 3                | 6                | 0              | -0.790960               | -0.289554 | 1.166158  |
| 4                | 6                | 0              | -0.037003               | 0.637509  | 0.403149  |
| 5                | 6                | 0              | -0.665741               | 1.763617  | -0.124574 |
| 6                | 6                | 0              | -2.053325               | 2.014599  | 0.129447  |
| 7                | 1                | 0              | -3.856187               | 1.313156  | 1.109139  |
| 8                | 1                | 0              | -2.691992               | -0.640379 | 2.127870  |
| 9                | 1                | 0              | -0.106824               | 2.490869  | -0.714771 |
| 10               | 8                | 0              | -0.277756               | -1.376356 | 1.712613  |
| 11               | 8                | 0              | -2.495435               | 3.174573  | -0.371386 |
| 12               | 6                | 0              | -3.860106               | 3.545778  | -0.189556 |
| 13               | 1                | 0              | -4.093593               | 3.680390  | 0.879946  |
| 14               | 1                | 0              | -3.989088               | 4.501243  | -0.714245 |
| 15               | 1                | 0              | -4.539247               | 2.793192  | -0.624156 |
| 16               | 6                | 0              | 1.378757                | 0.374829  | 0.222332  |
| 17               | 6                | 0              | 3.410615                | 0.672330  | -0.460454 |
| 18               | 6                | 0              | 3.333262                | -0.509703 | 0.297177  |

|    |   |   |           |           |           |
|----|---|---|-----------|-----------|-----------|
| 19 | 6 | 0 | 4.579629  | 1.143744  | -1.041764 |
| 20 | 6 | 0 | 4.478591  | -1.287858 | 0.504427  |
| 21 | 6 | 0 | 5.717482  | 0.357328  | -0.828296 |
| 22 | 1 | 0 | 4.604325  | 2.066162  | -1.624175 |
| 23 | 6 | 0 | 5.666582  | -0.832443 | -0.071521 |
| 24 | 1 | 0 | 4.436790  | -2.208011 | 1.090409  |
| 25 | 1 | 0 | 6.670240  | 0.674597  | -1.259181 |
| 26 | 1 | 0 | 6.583459  | -1.410682 | 0.066923  |
| 27 | 7 | 0 | 2.014937  | -0.657001 | 0.712402  |
| 28 | 8 | 0 | 2.151728  | 1.223613  | -0.496631 |
| 29 | 6 | 0 | -2.926062 | -3.417732 | -0.971266 |
| 30 | 6 | 0 | -3.596139 | -2.502474 | -1.776668 |
| 31 | 6 | 0 | -3.484776 | -1.269261 | -1.106347 |
| 32 | 7 | 0 | -2.465097 | -2.739367 | 0.100432  |
| 33 | 1 | 0 | -1.905882 | -3.078913 | 0.882424  |
| 34 | 1 | 0 | -2.746634 | -4.486196 | -1.079962 |
| 35 | 1 | 0 | -4.098413 | -2.699617 | -2.721140 |
| 36 | 1 | 0 | -3.853947 | -0.280426 | -1.376384 |
| 37 | 7 | 0 | -2.804548 | -1.448472 | 0.023888  |
| 38 | 1 | 0 | 0.709909  | -1.412373 | 1.500389  |

-----

**TS-S3af-pyr**

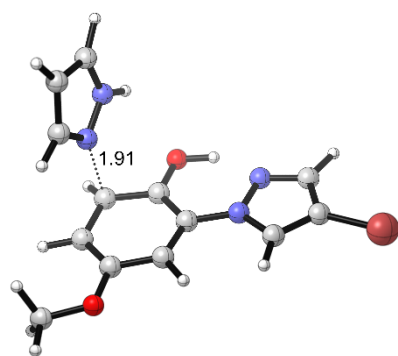

| Center Number | Atomic Number | Atomic Type | Coordinates (Angstroms) |          |          |
|---------------|---------------|-------------|-------------------------|----------|----------|
|               |               |             | X                       | Y        | Z        |
| 1             | 6             | 0           | -2.941051               | 1.349764 | 0.776690 |
| 2             | 6             | 0           | -2.580019               | 0.042796 | 1.226092 |

|    |    |   |           |           |           |
|----|----|---|-----------|-----------|-----------|
| 3  | 6  | 0 | -1.171819 | -0.342259 | 1.241940  |
| 4  | 6  | 0 | -0.229800 | 0.455210  | 0.541628  |
| 5  | 6  | 0 | -0.639332 | 1.656043  | -0.017948 |
| 6  | 6  | 0 | -1.993142 | 2.111608  | 0.120782  |
| 7  | 1  | 0 | -3.963446 | 1.692296  | 0.923876  |
| 8  | 1  | 0 | -3.173048 | -0.406217 | 2.026298  |
| 9  | 1  | 0 | 0.050839  | 2.305395  | -0.555235 |
| 10 | 8  | 0 | -0.893566 | -1.496021 | 1.827752  |
| 11 | 8  | 0 | -2.204582 | 3.324726  | -0.405006 |
| 12 | 6  | 0 | -3.511010 | 3.893046  | -0.347383 |
| 13 | 1  | 0 | -3.824053 | 4.061474  | 0.696577  |
| 14 | 1  | 0 | -3.449414 | 4.856448  | -0.869538 |
| 15 | 1  | 0 | -4.247600 | 3.246782  | -0.853586 |
| 16 | 6  | 0 | 3.264643  | -0.198235 | 0.032392  |
| 17 | 6  | 0 | 2.784260  | -1.298729 | 0.779545  |
| 18 | 7  | 0 | 1.490201  | -1.146619 | 1.018645  |
| 19 | 6  | 0 | -3.531572 | -3.146547 | -1.071812 |
| 20 | 6  | 0 | -4.074358 | -2.167040 | -1.897102 |
| 21 | 6  | 0 | -3.847417 | -0.950367 | -1.225780 |
| 22 | 7  | 0 | -3.028566 | -2.518373 | 0.011200  |
| 23 | 1  | 0 | -2.526710 | -2.910482 | 0.807942  |
| 24 | 1  | 0 | -3.467380 | -4.228545 | -1.174760 |
| 25 | 1  | 0 | -4.568759 | -2.312230 | -2.855049 |
| 26 | 1  | 0 | -4.100791 | 0.071218  | -1.506708 |
| 27 | 7  | 0 | -3.219183 | -1.197846 | -0.078377 |
| 28 | 1  | 0 | 0.095151  | -1.677677 | 1.686677  |
| 29 | 1  | 0 | 2.091659  | 1.582411  | -0.686557 |
| 30 | 6  | 0 | 2.175290  | 0.632896  | -0.165583 |
| 31 | 7  | 0 | 1.119354  | 0.025653  | 0.446795  |
| 32 | 1  | 0 | 3.324832  | -2.171950 | 1.142480  |
| 33 | 35 | 0 | 5.022378  | 0.082647  | -0.568943 |

---

TS-S3x-OC

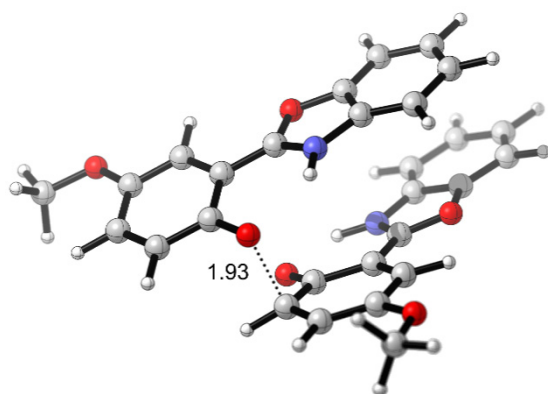

| Center<br>Number | Atomic<br>Number | Atomic<br>Type | Coordinates (Angstroms) |           |           |
|------------------|------------------|----------------|-------------------------|-----------|-----------|
|                  |                  |                | X                       | Y         | Z         |
| 1                | 6                | 0              | -2.305279               | -1.605293 | -1.924888 |
| 2                | 6                | 0              | -1.813352               | -0.556841 | -1.169265 |
| 3                | 6                | 0              | -0.458596               | -0.148837 | -1.253288 |
| 4                | 6                | 0              | 0.399694                | -0.895336 | -2.139085 |
| 5                | 6                | 0              | -0.100681               | -1.951898 | -2.906943 |
| 6                | 6                | 0              | -1.449911               | -2.319000 | -2.804477 |
| 7                | 1                | 0              | -3.357257               | -1.876502 | -1.835982 |
| 8                | 1                | 0              | -2.468390               | -0.011499 | -0.486793 |
| 9                | 1                | 0              | 0.544153                | -2.499034 | -3.595957 |
| 10               | 8                | 0              | 0.003535                | 0.852916  | -0.547676 |
| 11               | 8                | 0              | -1.843531               | -3.344777 | -3.569508 |
| 12               | 6                | 0              | -3.200638               | -3.786054 | -3.537381 |
| 13               | 1                | 0              | -3.887287               | -2.986266 | -3.861032 |
| 14               | 1                | 0              | -3.263279               | -4.624798 | -4.242591 |
| 15               | 1                | 0              | -3.484062               | -4.133729 | -2.529890 |
| 16               | 6                | 0              | 1.785875                | -0.532978 | -2.243201 |
| 17               | 6                | 0              | 3.914655                | -0.701509 | -2.738066 |
| 18               | 6                | 0              | 3.741154                | 0.499500  | -2.040764 |
| 19               | 6                | 0              | 5.148252                | -1.159458 | -3.173999 |
| 20               | 6                | 0              | 4.820255                | 1.329899  | -1.738372 |
| 21               | 6                | 0              | 6.232037                | -0.328926 | -2.870651 |
| 22               | 1                | 0              | 5.259339                | -2.105437 | -3.704582 |
| 23               | 6                | 0              | 6.071100                | 0.885944  | -2.171608 |
| 24               | 1                | 0              | 4.687453                | 2.263294  | -1.190391 |
| 25               | 1                | 0              | 7.233972                | -0.635424 | -3.178123 |
| 26               | 1                | 0              | 6.953266                | 1.492789  | -1.956671 |
| 27               | 7                | 0              | 2.379836                | 0.554405  | -1.757371 |
| 28               | 8                | 0              | 2.678030                | -1.311363 | -2.851812 |
| 29               | 6                | 0              | 0.530152                | 1.724590  | 1.947522  |

|    |   |   |           |           |           |
|----|---|---|-----------|-----------|-----------|
| 30 | 6 | 0 | 0.221100  | 0.482889  | 1.337943  |
| 31 | 6 | 0 | 1.280590  | -0.524285 | 1.088193  |
| 32 | 6 | 0 | 2.676155  | -0.063702 | 1.274419  |
| 33 | 6 | 0 | 2.926762  | 1.181829  | 1.785451  |
| 34 | 6 | 0 | 1.852778  | 2.087236  | 2.131834  |
| 35 | 1 | 0 | -0.287204 | 2.385344  | 2.232991  |
| 36 | 1 | 0 | -0.784756 | 0.077698  | 1.453960  |
| 37 | 1 | 0 | 3.948857  | 1.529023  | 1.951391  |
| 38 | 8 | 0 | 0.997832  | -1.648636 | 0.669063  |
| 39 | 8 | 0 | 2.280671  | 3.231137  | 2.652986  |
| 40 | 6 | 0 | 1.335886  | 4.223289  | 3.066540  |
| 41 | 1 | 0 | 0.686024  | 3.831256  | 3.865658  |
| 42 | 1 | 0 | 1.927730  | 5.063725  | 3.449265  |
| 43 | 1 | 0 | 0.722834  | 4.556412  | 2.213126  |
| 44 | 6 | 0 | 3.756800  | -0.944065 | 0.910458  |
| 45 | 6 | 0 | 5.797616  | -1.585463 | 0.456397  |
| 46 | 6 | 0 | 4.942807  | -2.642774 | 0.124584  |
| 47 | 6 | 0 | 7.169804  | -1.621697 | 0.266962  |
| 48 | 6 | 0 | 5.429756  | -3.825265 | -0.432620 |
| 49 | 6 | 0 | 7.660042  | -2.805359 | -0.292261 |
| 50 | 1 | 0 | 7.810492  | -0.778661 | 0.526753  |
| 51 | 6 | 0 | 6.809947  | -3.879353 | -0.634167 |
| 52 | 1 | 0 | 4.766488  | -4.649755 | -0.696816 |
| 53 | 1 | 0 | 8.732852  | -2.899380 | -0.474505 |
| 54 | 1 | 0 | 7.246511  | -4.780040 | -1.071296 |
| 55 | 7 | 0 | 3.668754  | -2.185618 | 0.445482  |
| 56 | 8 | 0 | 5.024161  | -0.550921 | 0.948425  |
| 57 | 1 | 0 | 2.763376  | -2.652971 | 0.325109  |
| 58 | 1 | 0 | 1.851252  | 1.266880  | -1.241065 |

-----

TS-S3x-CC

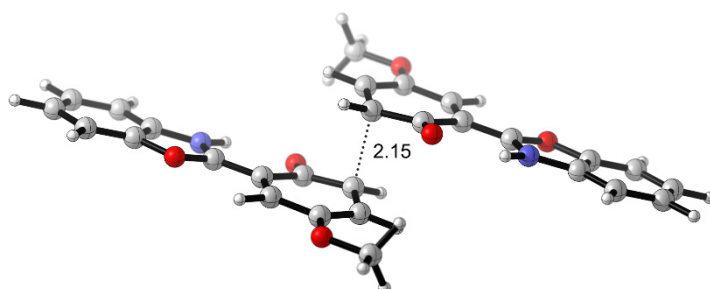

| Center<br>Number | Atomic<br>Number | Atomic<br>Type | Coordinates (Angstroms) |           |           |
|------------------|------------------|----------------|-------------------------|-----------|-----------|
|                  |                  |                | X                       | Y         | Z         |
| 1                | 6                | 0              | -0.269622               | 1.423727  | 0.971235  |
| 2                | 6                | 0              | -0.600925               | 0.043161  | 1.019406  |
| 3                | 6                | 0              | -2.014512               | -0.384770 | 0.992520  |
| 4                | 6                | 0              | -2.973758               | 0.634039  | 0.507457  |
| 5                | 6                | 0              | -2.571860               | 1.934619  | 0.320777  |
| 6                | 6                | 0              | -1.217808               | 2.349318  | 0.570996  |
| 7                | 1                | 0              | 0.757153                | 1.721526  | 1.175495  |
| 8                | 1                | 0              | 0.067086                | -0.641270 | 1.547426  |
| 9                | 1                | 0              | -3.279534               | 2.698471  | -0.009628 |
| 10               | 8                | 0              | -2.358677               | -1.524535 | 1.317387  |
| 11               | 8                | 0              | -1.005145               | 3.654082  | 0.387002  |
| 12               | 6                | 0              | 0.317830                | 4.172004  | 0.528831  |
| 13               | 1                | 0              | 1.010944                | 3.661652  | -0.161356 |
| 14               | 1                | 0              | 0.258108                | 5.237825  | 0.275189  |
| 15               | 1                | 0              | 0.676127                | 4.060277  | 1.565773  |
| 16               | 6                | 0              | -4.336643               | 0.240069  | 0.276532  |
| 17               | 6                | 0              | -6.433670               | 0.377345  | -0.328250 |
| 18               | 6                | 0              | -6.212588               | -0.928561 | 0.125070  |
| 19               | 6                | 0              | -7.659349               | 0.828260  | -0.792671 |
| 20               | 6                | 0              | -7.235675               | -1.876945 | 0.137572  |
| 21               | 6                | 0              | -8.686036               | -0.121598 | -0.781632 |
| 22               | 1                | 0              | -7.804033               | 1.852074  | -1.139561 |
| 23               | 6                | 0              | -8.478051               | -1.441219 | -0.327228 |
| 24               | 1                | 0              | -7.068543               | -2.895518 | 0.490190  |
| 25               | 1                | 0              | -9.678204               | 0.168405  | -1.134710 |
| 26               | 1                | 0              | -9.314607               | -2.143526 | -0.340077 |
| 27               | 7                | 0              | -4.872477               | -0.955560 | 0.495456  |
| 28               | 8                | 0              | -5.244339               | 1.074594  | -0.219286 |
| 29               | 6                | 0              | -0.521492               | -2.107636 | -0.896119 |
| 30               | 6                | 0              | -0.190160               | -0.727075 | -0.944264 |

|    |   |   |           |           |           |
|----|---|---|-----------|-----------|-----------|
| 31 | 6 | 0 | 1.223437  | -0.299175 | -0.917423 |
| 32 | 6 | 0 | 2.182689  | -1.318023 | -0.432471 |
| 33 | 6 | 0 | 1.780775  | -2.618599 | -0.245806 |
| 34 | 6 | 0 | 0.426698  | -3.033260 | -0.495967 |
| 35 | 1 | 0 | -1.548279 | -2.405409 | -1.100359 |
| 36 | 1 | 0 | -0.858153 | -0.042614 | -1.472266 |
| 37 | 1 | 0 | 2.488455  | -3.382478 | 0.084530  |
| 38 | 8 | 0 | 1.567612  | 0.840594  | -1.242267 |
| 39 | 8 | 0 | 0.214026  | -4.338031 | -0.312031 |
| 40 | 6 | 0 | -1.108968 | -4.855927 | -0.453796 |
| 41 | 1 | 0 | -1.467316 | -4.744182 | -1.490718 |
| 42 | 1 | 0 | -1.049252 | -5.921753 | -0.200168 |
| 43 | 1 | 0 | -1.802036 | -4.345572 | 0.236435  |
| 44 | 6 | 0 | 3.545600  | -0.924091 | -0.201653 |
| 45 | 6 | 0 | 5.642685  | -1.061439 | 0.402900  |
| 46 | 6 | 0 | 5.421567  | 0.244511  | -0.050277 |
| 47 | 6 | 0 | 6.868405  | -1.512410 | 0.867157  |
| 48 | 6 | 0 | 6.444661  | 1.192888  | -0.062791 |
| 49 | 6 | 0 | 7.895099  | -0.562558 | 0.856105  |
| 50 | 1 | 0 | 7.013113  | -2.536256 | 1.213938  |
| 51 | 6 | 0 | 7.687079  | 0.757107  | 0.401847  |
| 52 | 1 | 0 | 6.277503  | 2.211496  | -0.415294 |
| 53 | 1 | 0 | 8.887299  | -0.852603 | 1.209057  |
| 54 | 1 | 0 | 8.523642  | 1.459406  | 0.414681  |
| 55 | 7 | 0 | 4.081419  | 0.271553  | -0.420529 |
| 56 | 8 | 0 | 4.453335  | -1.758667 | 0.293993  |
| 57 | 1 | 0 | -4.313972 | -1.721707 | 0.890631  |
| 58 | 1 | 0 | 3.522894  | 1.037740  | -0.815588 |

---

**TS-S3x-CR-Sub**

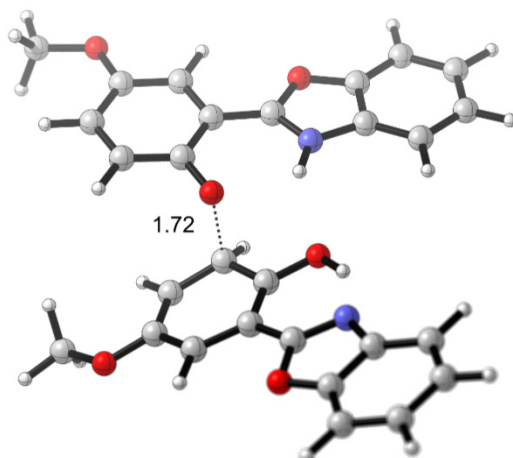



| Center<br>Number | Atomic<br>Number | Atomic<br>Type | Coordinates (Angstroms) |           |           |
|------------------|------------------|----------------|-------------------------|-----------|-----------|
|                  |                  |                | X                       | Y         | Z         |
| 1                | 6                | 0              | -0.269622               | 1.423727  | 0.971235  |
| 2                | 6                | 0              | -0.600925               | 0.043161  | 1.019406  |
| 3                | 6                | 0              | -2.014512               | -0.384770 | 0.992520  |
| 4                | 6                | 0              | -2.973758               | 0.634039  | 0.507457  |
| 5                | 6                | 0              | -2.571860               | 1.934619  | 0.320777  |
| 6                | 6                | 0              | -1.217808               | 2.349318  | 0.570996  |
| 7                | 1                | 0              | 0.757153                | 1.721526  | 1.175495  |
| 8                | 1                | 0              | 0.067086                | -0.641270 | 1.547426  |
| 9                | 1                | 0              | -3.279534               | 2.698471  | -0.009628 |
| 10               | 8                | 0              | -2.358677               | -1.524535 | 1.317387  |
| 11               | 8                | 0              | -1.005145               | 3.654082  | 0.387002  |
| 12               | 6                | 0              | 0.317830                | 4.172004  | 0.528831  |
| 13               | 1                | 0              | 1.010944                | 3.661652  | -0.161356 |
| 14               | 1                | 0              | 0.258108                | 5.237825  | 0.275189  |
| 15               | 1                | 0              | 0.676127                | 4.060277  | 1.565773  |
| 16               | 6                | 0              | -4.336643               | 0.240069  | 0.276532  |
| 17               | 6                | 0              | -6.433670               | 0.377345  | -0.328250 |
| 18               | 6                | 0              | -6.212588               | -0.928561 | 0.125070  |
| 19               | 6                | 0              | -7.659349               | 0.828260  | -0.792671 |
| 20               | 6                | 0              | -7.235675               | -1.876945 | 0.137572  |
| 21               | 6                | 0              | -8.686036               | -0.121598 | -0.781632 |
| 22               | 1                | 0              | -7.804033               | 1.852074  | -1.139561 |
| 23               | 6                | 0              | -8.478051               | -1.441219 | -0.327228 |
| 24               | 1                | 0              | -7.068543               | -2.895518 | 0.490190  |
| 25               | 1                | 0              | -9.678204               | 0.168405  | -1.134710 |
| 26               | 1                | 0              | -9.314607               | -2.143526 | -0.340077 |
| 27               | 7                | 0              | -4.872477               | -0.955560 | 0.495456  |
| 28               | 8                | 0              | -5.244339               | 1.074594  | -0.219286 |
| 29               | 6                | 0              | -0.521492               | -2.107636 | -0.896119 |
| 30               | 6                | 0              | -0.190160               | -0.727075 | -0.944264 |

|    |   |   |           |           |           |
|----|---|---|-----------|-----------|-----------|
| 31 | 6 | 0 | 1.223437  | -0.299175 | -0.917423 |
| 32 | 6 | 0 | 2.182689  | -1.318023 | -0.432471 |
| 33 | 6 | 0 | 1.780775  | -2.618599 | -0.245806 |
| 34 | 6 | 0 | 0.426698  | -3.033260 | -0.495967 |
| 35 | 1 | 0 | -1.548279 | -2.405409 | -1.100359 |
| 36 | 1 | 0 | -0.858153 | -0.042614 | -1.472266 |
| 37 | 1 | 0 | 2.488455  | -3.382478 | 0.084530  |
| 38 | 8 | 0 | 1.567612  | 0.840594  | -1.242267 |
| 39 | 8 | 0 | 0.214026  | -4.338031 | -0.312031 |
| 40 | 6 | 0 | -1.108968 | -4.855927 | -0.453796 |
| 41 | 1 | 0 | -1.467316 | -4.744182 | -1.490718 |
| 42 | 1 | 0 | -1.049252 | -5.921753 | -0.200168 |
| 43 | 1 | 0 | -1.802036 | -4.345572 | 0.236435  |
| 44 | 6 | 0 | 3.545600  | -0.924091 | -0.201653 |
| 45 | 6 | 0 | 5.642685  | -1.061439 | 0.402900  |
| 46 | 6 | 0 | 5.421567  | 0.244511  | -0.050277 |
| 47 | 6 | 0 | 6.868405  | -1.512410 | 0.867157  |
| 48 | 6 | 0 | 6.444661  | 1.192888  | -0.062791 |
| 49 | 6 | 0 | 7.895099  | -0.562558 | 0.856105  |
| 50 | 1 | 0 | 7.013113  | -2.536256 | 1.213938  |
| 51 | 6 | 0 | 7.687079  | 0.757107  | 0.401847  |
| 52 | 1 | 0 | 6.277503  | 2.211496  | -0.415294 |
| 53 | 1 | 0 | 8.887299  | -0.852603 | 1.209057  |
| 54 | 1 | 0 | 8.523642  | 1.459406  | 0.414681  |
| 55 | 7 | 0 | 4.081419  | 0.271553  | -0.420529 |
| 56 | 8 | 0 | 4.453335  | -1.758667 | 0.293993  |
| 57 | 1 | 0 | -4.313972 | -1.721707 | 0.890631  |
| 58 | 1 | 0 | 3.522894  | 1.037740  | -0.815588 |

---

### TS-S3af-OC

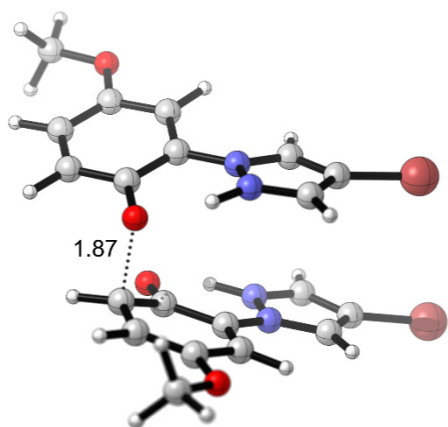

| Center<br>Number | Atomic<br>Number | Atomic<br>Type | Coordinates (Angstroms) |           |           |
|------------------|------------------|----------------|-------------------------|-----------|-----------|
|                  |                  |                | X                       | Y         | Z         |
| 1                | 6                | 0              | -2.103318               | -1.864847 | -1.807300 |
| 2                | 6                | 0              | -1.708328               | -0.790087 | -1.029508 |
| 3                | 6                | 0              | -0.425192               | -0.208903 | -1.145110 |
| 4                | 6                | 0              | 0.477764                | -0.803559 | -2.084445 |
| 5                | 6                | 0              | 0.082690                | -1.859642 | -2.893432 |
| 6                | 6                | 0              | -1.205677               | -2.408722 | -2.754219 |
| 7                | 1                | 0              | -3.104784               | -2.275378 | -1.683147 |
| 8                | 1                | 0              | -2.391839               | -0.356393 | -0.296601 |
| 9                | 1                | 0              | 0.740950                | -2.280373 | -3.653360 |
| 10               | 8                | 0              | -0.070507               | 0.843010  | -0.423650 |
| 11               | 8                | 0              | -1.488703               | -3.433371 | -3.567919 |
| 12               | 6                | 0              | -2.771835               | -4.056856 | -3.514924 |
| 13               | 1                | 0              | -3.575434               | -3.338254 | -3.745595 |
| 14               | 1                | 0              | -2.757665               | -4.843113 | -4.280837 |
| 15               | 1                | 0              | -2.951368               | -4.512250 | -2.526725 |
| 16               | 6                | 0              | 3.961895                | 0.042234  | -2.595615 |
| 17               | 6                | 0              | 3.423471                | 1.187275  | -1.992832 |
| 18               | 7                | 0              | 2.127356                | 0.952808  | -1.789163 |
| 19               | 6                | 0              | 0.602177                | 1.849043  | 1.925887  |
| 20               | 6                | 0              | 0.179809                | 0.590665  | 1.412187  |
| 21               | 6                | 0              | 1.147808                | -0.511598 | 1.214321  |
| 22               | 6                | 0              | 2.575972                | -0.141555 | 1.266073  |
| 23               | 6                | 0              | 2.941095                | 1.104954  | 1.665492  |
| 24               | 6                | 0              | 1.951157                | 2.110207  | 2.013018  |
| 25               | 1                | 0              | -0.149927               | 2.586535  | 2.200723  |
| 26               | 1                | 0              | -0.837838               | 0.256128  | 1.619527  |
| 27               | 1                | 0              | 3.984682                | 1.411781  | 1.743831  |
| 28               | 8                | 0              | 0.743028                | -1.638706 | 0.900695  |
| 29               | 8                | 0              | 2.504747                | 3.246361  | 2.426980  |
| 30               | 6                | 0              | 1.668479                | 4.349462  | 2.787322  |

|    |    |   |          |           |           |
|----|----|---|----------|-----------|-----------|
| 31 | 1  | 0 | 1.032683 | 4.091557  | 3.649878  |
| 32 | 1  | 0 | 2.346177 | 5.168200  | 3.058711  |
| 33 | 1  | 0 | 1.037769 | 4.654489  | 1.936160  |
| 34 | 6  | 0 | 5.366451 | -2.222476 | 0.288107  |
| 35 | 6  | 0 | 4.247618 | -3.054328 | 0.129310  |
| 36 | 7  | 0 | 3.178884 | -2.356549 | 0.506027  |
| 37 | 1  | 0 | 2.159088 | -2.569092 | 0.532132  |
| 38 | 1  | 0 | 1.405452 | 1.466108  | -1.249155 |
| 39 | 7  | 0 | 3.545499 | -1.116549 | 0.901488  |
| 40 | 6  | 0 | 4.891391 | -1.007338 | 0.773363  |
| 41 | 1  | 0 | 5.426877 | -0.095856 | 1.026029  |
| 42 | 1  | 0 | 4.155790 | -4.082226 | -0.217968 |
| 43 | 35 | 0 | 7.148243 | -2.661227 | -0.078181 |
| 44 | 7  | 0 | 1.802168 | -0.288944 | -2.211965 |
| 45 | 6  | 0 | 2.916126 | -0.871178 | -2.718986 |
| 46 | 1  | 0 | 3.878584 | 2.130871  | -1.696858 |
| 47 | 1  | 0 | 2.907914 | -1.883366 | -3.115191 |
| 48 | 35 | 0 | 5.741498 | -0.220239 | -3.113311 |

TS'-S3af-OC

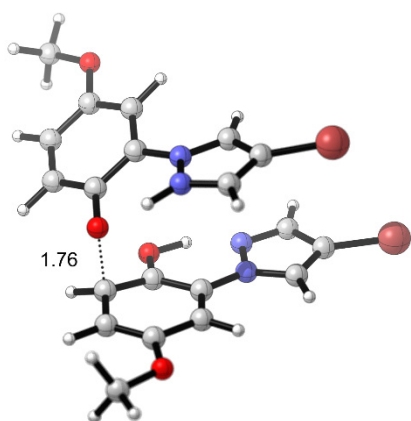

| Center<br>Number | Atomic<br>Number | Atomic<br>Type | Coordinates (Angstroms) |   |   |
|------------------|------------------|----------------|-------------------------|---|---|
|                  |                  |                | X                       | Y | Z |

|    |   |   |           |           |           |
|----|---|---|-----------|-----------|-----------|
| 1  | 6 | 0 | -2.110340 | -1.883982 | -1.777111 |
| 2  | 6 | 0 | -1.699005 | -0.850803 | -0.955262 |
| 3  | 6 | 0 | -0.417168 | -0.269100 | -1.074742 |
| 4  | 6 | 0 | 0.467151  | -0.807020 | -2.064023 |
| 5  | 6 | 0 | 0.058100  | -1.823322 | -2.910379 |
| 6  | 6 | 0 | -1.230266 | -2.381248 | -2.767812 |
| 7  | 1 | 0 | -3.109957 | -2.299495 | -1.655288 |
| 8  | 1 | 0 | -2.365307 | -0.454608 | -0.186168 |
| 9  | 1 | 0 | 0.702092  | -2.206581 | -3.701779 |
| 10 | 8 | 0 | -0.039422 | 0.759325  | -0.326261 |
| 11 | 8 | 0 | -1.528172 | -3.362774 | -3.618474 |
| 12 | 6 | 0 | -2.812249 | -3.991094 | -3.577415 |
| 13 | 1 | 0 | -3.615499 | -3.262712 | -3.775064 |
| 14 | 1 | 0 | -2.801684 | -4.748820 | -4.371128 |
| 15 | 1 | 0 | -2.980410 | -4.481510 | -2.604671 |
| 16 | 6 | 0 | 3.959158  | -0.005088 | -2.568811 |
| 17 | 6 | 0 | 3.426793  | 1.175648  | -2.032832 |
| 18 | 7 | 0 | 2.125765  | 0.967768  | -1.832774 |
| 19 | 6 | 0 | 0.601702  | 1.826854  | 1.916828  |
| 20 | 6 | 0 | 0.206730  | 0.542589  | 1.406849  |
| 21 | 6 | 0 | 1.221521  | -0.501541 | 1.240915  |
| 22 | 6 | 0 | 2.617322  | -0.134022 | 1.265987  |
| 23 | 6 | 0 | 2.947390  | 1.138782  | 1.643675  |
| 24 | 6 | 0 | 1.939667  | 2.123183  | 1.990734  |
| 25 | 1 | 0 | -0.175199 | 2.541232  | 2.181722  |
| 26 | 1 | 0 | -0.781652 | 0.167666  | 1.683423  |
| 27 | 1 | 0 | 3.986501  | 1.465499  | 1.700132  |
| 28 | 8 | 0 | 0.802611  | -1.670303 | 0.918596  |
| 29 | 8 | 0 | 2.472195  | 3.278667  | 2.389145  |
| 30 | 6 | 0 | 1.609369  | 4.358975  | 2.750012  |
| 31 | 1 | 0 | 0.986678  | 4.089154  | 3.618933  |
| 32 | 1 | 0 | 2.265143  | 5.198462  | 3.012440  |
| 33 | 1 | 0 | 0.962859  | 4.642772  | 1.902928  |
| 34 | 6 | 0 | 5.371353  | -2.229853 | 0.319316  |
| 35 | 6 | 0 | 4.214263  | -3.029926 | 0.157435  |
| 36 | 7 | 0 | 3.144312  | -2.335860 | 0.513799  |
| 37 | 1 | 0 | 1.426851  | 1.553993  | -1.359153 |
| 38 | 7 | 0 | 3.576556  | -1.107572 | 0.905479  |

|    |    |   |          |           |           |
|----|----|---|----------|-----------|-----------|
| 39 | 6  | 0 | 4.931703 | -1.006753 | 0.795149  |
| 40 | 1  | 0 | 5.478803 | -0.103391 | 1.052189  |
| 41 | 1  | 0 | 4.129242 | -4.057991 | -0.192668 |
| 42 | 35 | 0 | 7.144661 | -2.726446 | -0.033490 |
| 43 | 7  | 0 | 1.790503 | -0.291357 | -2.192857 |
| 44 | 6  | 0 | 2.903920 | -0.910385 | -2.656360 |
| 45 | 1  | 0 | 3.887786 | 2.130276  | -1.785152 |
| 46 | 1  | 0 | 2.880733 | -1.942147 | -2.998193 |
| 47 | 35 | 0 | 5.740251 | -0.308315 | -3.051808 |
| 48 | 1  | 0 | 1.658206 | -2.256629 | 0.669342  |

-----

**TS-S3af-CC**

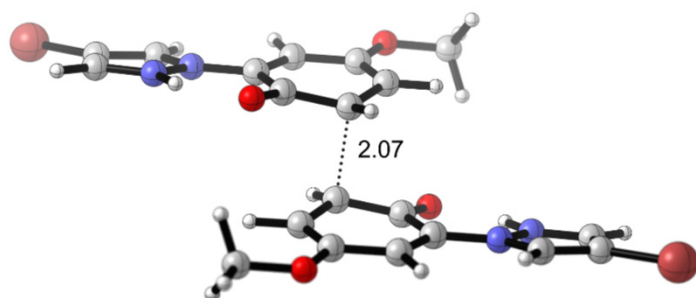

-----

| Center<br>Number | Atomic<br>Number | Atomic<br>Type | Coordinates (Angstroms) |           |           |
|------------------|------------------|----------------|-------------------------|-----------|-----------|
|                  |                  |                | X                       | Y         | Z         |
| 1                | 6                | 0              | -0.170144               | 1.339918  | 0.874927  |
| 2                | 6                | 0              | -0.565534               | -0.032335 | 0.885547  |
| 3                | 6                | 0              | -2.000234               | -0.388748 | 0.871808  |
| 4                | 6                | 0              | -2.911407               | 0.673200  | 0.397796  |
| 5                | 6                | 0              | -2.462292               | 1.950247  | 0.251747  |
| 6                | 6                | 0              | -1.083601               | 2.301546  | 0.507523  |
| 7                | 1                | 0              | 0.868793                | 1.589449  | 1.081181  |
| 8                | 1                | 0              | 0.047365                | -0.744441 | 1.444135  |
| 9                | 1                | 0              | -3.122710               | 2.766809  | -0.044340 |
| 10               | 8                | 0              | -2.388882               | -1.516957 | 1.203056  |
| 11               | 8                | 0              | -0.835638               | 3.605698  | 0.358215  |

-----

|    |    |   |           |           |           |
|----|----|---|-----------|-----------|-----------|
| 12 | 6  | 0 | 0.504138  | 4.076921  | 0.497717  |
| 13 | 1  | 0 | 1.172207  | 3.564183  | -0.215138 |
| 14 | 1  | 0 | 0.475699  | 5.150880  | 0.273840  |
| 15 | 1  | 0 | 0.871082  | 3.925224  | 1.526499  |
| 16 | 6  | 0 | -6.411640 | 0.292069  | -0.423456 |
| 17 | 6  | 0 | -6.056265 | -0.943873 | 0.136300  |
| 18 | 7  | 0 | -4.769015 | -0.871384 | 0.468867  |
| 19 | 6  | 0 | -0.547987 | -2.196706 | -0.957645 |
| 20 | 6  | 0 | -0.195319 | -0.813126 | -0.999876 |
| 21 | 6  | 0 | 1.226074  | -0.412882 | -1.010736 |
| 22 | 6  | 0 | 2.173712  | -1.433113 | -0.520384 |
| 23 | 6  | 0 | 1.767154  | -2.720986 | -0.342312 |
| 24 | 6  | 0 | 0.399287  | -3.121769 | -0.580771 |
| 25 | 1  | 0 | -1.580305 | -2.481932 | -1.148576 |
| 26 | 1  | 0 | -0.834439 | -0.129243 | -1.564470 |
| 27 | 1  | 0 | 2.456465  | -3.507785 | -0.031515 |
| 28 | 8  | 0 | 1.574813  | 0.719993  | -1.370875 |
| 29 | 8  | 0 | 0.194358  | -4.430850 | -0.406055 |
| 30 | 6  | 0 | -1.129316 | -4.948148 | -0.537020 |
| 31 | 1  | 0 | -1.501749 | -4.823489 | -1.567578 |
| 32 | 1  | 0 | -1.065950 | -6.017328 | -0.298220 |
| 33 | 1  | 0 | -1.814356 | -4.448398 | 0.168733  |
| 34 | 6  | 0 | 5.656855  | -0.902143 | 0.290271  |
| 35 | 6  | 0 | 5.262092  | 0.297003  | -0.320681 |
| 36 | 7  | 0 | 3.979504  | 0.167542  | -0.654061 |
| 37 | 1  | 0 | -4.093283 | -1.548149 | 0.885478  |
| 38 | 1  | 0 | 3.278880  | 0.806287  | -1.090816 |
| 39 | 7  | 0 | -4.272813 | 0.344084  | 0.151787  |
| 40 | 6  | 0 | -5.265060 | 1.081888  | -0.402822 |
| 41 | 1  | 0 | -6.633928 | -1.849847 | 0.312688  |
| 42 | 1  | 0 | -5.102076 | 2.099761  | -0.748356 |
| 43 | 35 | 0 | -8.097018 | 0.783770  | -1.073372 |
| 44 | 7  | 0 | 3.523970  | -1.050960 | -0.290160 |
| 45 | 6  | 0 | 4.538224  | -1.731348 | 0.295960  |
| 46 | 1  | 0 | 4.408497  | -2.739739 | 0.680033  |
| 47 | 1  | 0 | 5.810659  | 1.213124  | -0.533283 |
| 48 | 35 | 0 | 7.353462  | -1.307722 | 0.970601  |

---

## 10. Fluorescence properties of the selected products

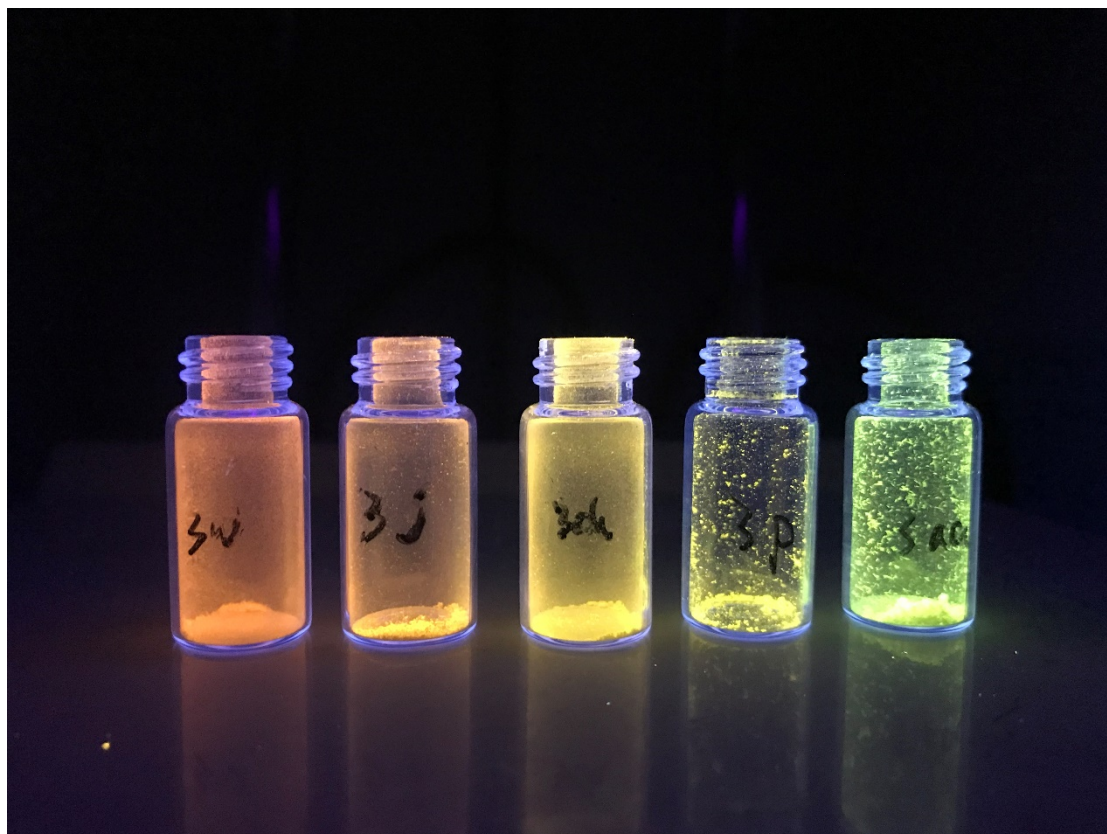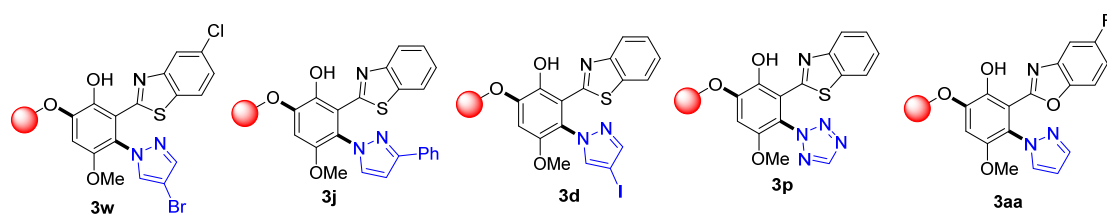

## 11. Characterization of Products

2-(Benzo[d]thiazol-2-yl)-6-(2-(benzo[d]thiazol-2-yl)-4-methoxyphenoxy)-3-(4-bromo-1H-pyrazol-1-yl)-4-methoxyphenol (3a)



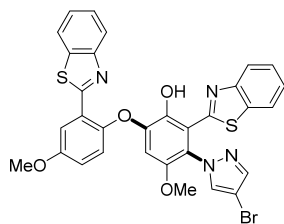

Yellow solid (72 mg, 88 % yield, electrolysis time: 6.5 h,  $R_f = 0.17$  (petroleum ether/ethyl acetate = 10 : 1 (v/v))); M.P. 292.5-295.2 °C; NMR Spectroscopy:  $^1\text{H}$  NMR (300 MHz,  $\text{CDCl}_3$ , 25 °C,  $\delta$ ): 13.95 (s, 1H), 8.18 – 8.17 (m, 1H), 8.13 (d,  $J = 8.1$  Hz, 1H), 7.97 (d,  $J = 7.8$  Hz, 1H), 7.89 (d,  $J = 8.1$  Hz, 1H), 7.86 (s, 1H), 7.81 (d,  $J = 8.1$  Hz, 1H), 7.63 (s, 1H), 7.53 - 7.47 (m, 2H), 7.43 - 7.34 (m, 2H), 7.07 - 7.00 (m, 2H), 6.82 (s, 1H), 3.97 (s, 3H), 3.61 (s, 3H).  $^{13}\text{C}$  NMR (75 MHz,  $\text{CDCl}_3$ , 25 °C,  $\delta$ ): 164.3, 162.4, 156.2, 152.3, 149.1, 149.1, 148.5, 146.8, 145.2, 142.7, 136.5, 133.9, 133.8, 126.9, 126.2, 125.3, 125.2, 123.1, 122.3, 121.9, 121.6, 121.4, 119.9, 119.3, 116.4, 112.7, 106.9, 95.5, 57.1, 56.1. Mass Spectrometry: HRMS (ESI-TOF) ( $m/z$ ): calcd for  $\text{C}_{31}\text{H}_{22}\text{BrN}_4\text{O}_4\text{S}_2^+$  ( $[\text{M} + \text{H}]^+$ ), 657.0260, found, 657.0248.

**2-(Benzo[d]thiazol-2-yl)-6-(2-(benzo[d]thiazol-2-yl)-4-methoxyphenoxy)-3-(4-fluoro-1H-pyrazol-1-yl)-4-methoxyphenol (3b)**

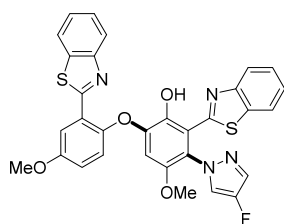

Yellow solid (17 mg, 23 % yield, electrolysis time: 6.8 h,  $R_f = 0.25$  (petroleum ether/ethyl acetate = 10 : 1 (v/v))); M.P. 287.3-288.5 °C; NMR Spectroscopy:  $^1\text{H}$  NMR (300 MHz,  $\text{CDCl}_3$ , 25 °C,  $\delta$ ): 13.95 (s, 1H), 8.17 (d,  $J = 0.9$  Hz, 1H), 8.13 (d,  $J = 8.1$  Hz, 1H), 7.97 (d,  $J = 8.1$  Hz, 1H), 7.89 (d,  $J = 8.1$  Hz, 1H), 7.81 (d,  $J = 7.8$  Hz, 1H), 7.77 (d,  $J = 3.9$  Hz, 1H), 7.52 - 7.47 (m, 3H), 7.43 - 7.34 (m, 2H), 7.07 - 7.00 (m, 2H), 6.82 (s, 1H), 3.96 (s, 3H), 3.61 (s, 3H).  $^{13}\text{C}$  NMR (75 MHz,  $\text{CDCl}_3$ , 25 °C,  $\delta$ ): 164.5, 162.4, 156.2, 152.8, 152.3, 149.3, 149.2, 148.5, 146.7, 145.2, 136.5, 133.9, 129.9 (d,  $J = 13.5$  Hz, 1C), 126.9, 126.2, 125.3, 125.2, 123.1, 122.6, 122.3, 121.6, 121.3, 119.9, 119.5, 119.3, 116.6, 112.7, 107.1, 57.2, 56.1.  $^{19}\text{F}$  NMR (282 MHz,  $\text{CDCl}_3$ , 25 °C,  $\delta$ ): -174.8 (s). Mass Spectrometry: HRMS (ESI-TOF) ( $m/z$ ): calcd for  $\text{C}_{31}\text{H}_{22}\text{FN}_4\text{O}_4\text{S}_2^+$  ( $[\text{M} + \text{H}]^+$ ), 597.1061, found, 597.1070.

**2-(Benzo[d]thiazol-2-yl)-6-(2-(benzo[d]thiazol-2-yl)-4-methoxyphenoxy)-3-(4-chloro-1H-pyrazol-1-yl)-4-methoxyphenol (3c)**

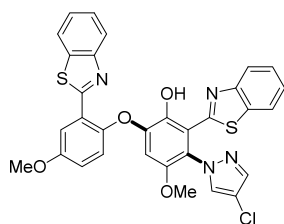

Yellow solid (32 mg, 42 % yield, electrolysis time: 7.5 h,  $R_f = 0.20$  (petroleum ether/ethyl acetate = 10 : 1 (v/v))); M.P. 265.6-268.2 °C; NMR Spectroscopy:  $^1\text{H}$  NMR (300 MHz,  $\text{CDCl}_3$ , 25 °C,  $\delta$ ): 13.86 (s, 1H), 8.16 (d,  $J = 1.5$  Hz, 1H), 8.12 (d,  $J = 8.1$  Hz, 1H), 7.96 (d,  $J = 8.1$  Hz, 1H), 7.89 (d,  $J = 8.1$  Hz, 1H), 7.84 (s, 1H), 7.80 (d,  $J = 7.8$  Hz, 1H), 7.62 (s, 1H), 7.51 - 7.46 (m, 3H), 7.42 - 7.34 (m, 2H), 7.07 - 7.03 (m, 2H), 6.83 (s, 1H), 3.95 (s, 3H), 3.60 (s, 3H).  $^{13}\text{C}$  NMR (75 MHz,  $\text{CDCl}_3$ , 25 °C,  $\delta$ ): 164.3, 162.4, 156.2, 152.3, 149.1, 148.5, 146.8, 145.1, 140.7, 136.5, 133.9, 131.7, 126.9, 126.2, 125.3, 125.2, 123.1, 122.3, 122.0, 121.6, 121.4, 119.9, 119.3, 116.5, 112.7, 112.4, 106.9, 57.1, 56.1. Mass Spectrometry: HRMS (ESI-TOF) ( $m/z$ ): calcd for  $\text{C}_{31}\text{H}_{22}\text{ClN}_4\text{O}_4\text{S}_2^+$  ( $[\text{M} + \text{H}]^+$ ), 613.0766, found, 613.0775.

**2-(Benzo[d]thiazol-2-yl)-6-(2-(benzo[d]thiazol-2-yl)-4-methoxyphenoxy)-3-(4-iodo-1H-pyrazol-1-yl)-4-methoxyphenol (3d)**

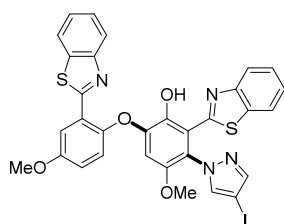

Yellow solid (38 mg, 43 % yield, electrolysis time: 7.3 h,  $R_f = 0.35$  (petroleum ether/ethyl acetate = 3 : 1 (v/v))); M.P. 283.3-285.2 °C; NMR Spectroscopy:  $^1\text{H}$  NMR (300 MHz,  $\text{CDCl}_3$ , 25 °C,  $\delta$ ): 13.96 (s, 1H), 8.17 (d,  $J = 1.8$  Hz, 1H), 8.12 (d,  $J = 8.1$  Hz, 1H), 7.95 (d,  $J = 7.8$  Hz, 1H), 7.91 - 7.87 (m, 2H), 7.79 (d,  $J = 8.1$  Hz, 1H), 7.66 (s, 1H), 7.52 - 7.45 (m, 2H), 7.41 - 7.33 (m, 2H), 7.06 - 6.99 (m, 2H), 6.84 (s, 1H), 3.95 (s, 3H), 3.59 (s, 3H).  $^{13}\text{C}$  NMR (75 MHz,  $\text{CDCl}_3$ , 25 °C,  $\delta$ ): 164.4, 162.4, 156.2, 152.3, 149.1, 149.0, 148.5, 147.1, 146.7, 145.2, 138.0, 136.5, 133.9, 126.9, 126.2, 125.3, 125.2, 123.1, 122.3, 121.9, 121.6, 121.4, 119.9, 119.3, 116.4, 112.7, 107.0, 57.1, 56.1. Mass Spectrometry: HRMS (ESI-TOF) ( $m/z$ ): calcd for  $\text{C}_{31}\text{H}_{22}\text{IN}_4\text{O}_4\text{S}_2^+$  ( $[\text{M} + \text{H}]^+$ ), 705.0122, found, 705.0131.

**2-(Benzo[d]thiazol-2-yl)-6-(2-(benzo[d]thiazol-2-yl)-4-methoxyphenoxy)-4-methoxy-3-(1H-pyrazol-1-yl)phenol (3e)**

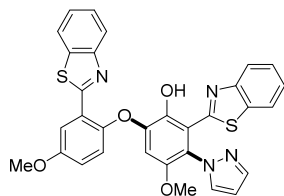

Yellow solid (51 mg, 70 % yield, electrolysis time: 7.0 h,  $R_f = 0.3$  (petroleum ether/ethyl acetate = 5 : 1 (v/v))); M.P. 280.3-281.2 °C; NMR Spectroscopy:  $^1\text{H}$  NMR (300 MHz,  $\text{CDCl}_3$ , 25 °C,  $\delta$ ): 14.01 (s, 1H), 8.17 (d,  $J = 1.8$  Hz, 1H), 8.13 (d,  $J = 8.1$  Hz, 1H), 7.97 - 7.88 (m, 3H), 7.75 (d,  $J = 7.5$  Hz, 1H), 7.60 (d,  $J = 2.4$  Hz, 1H), 7.53 - 7.44 (m, 2H), 7.37 (t,  $J = 7.8$  Hz, 2H), 7.07 - 7.00 (m, 2H), 6.86 (s, 1H), 6.86 (t,  $J = 2.1$  Hz, 1H), 3.96 (s, 3H), 3.59 (s, 3H).  $^{13}\text{C}$  NMR (75 MHz,  $\text{CDCl}_3$ , 25 °C,  $\delta$ ): 164.9, 162.5, 156.1, 152.3, 149.3, 149.1, 148.7, 146.3, 145.3, 142.1, 136.5, 134.1, 133.8,

126.8 126.2, 126.0, 125.2, 125.1, 123.1, 122.9, 122.2, 121.6, 121.3, 119.8, 119.3, 116.7, 112.7, 108.1, 107.5, 57.3, 56.1. Mass Spectrometry: HRMS (ESI-TOF) (m/z): calcd for C<sub>31</sub>H<sub>23</sub>N<sub>4</sub>O<sub>4</sub>S<sub>2</sub><sup>+</sup> ([M + H]<sup>+</sup>), 579.1155, found, 579.1170.

Crystal structure determination of **3e**: C<sub>31</sub>H<sub>22</sub>N<sub>4</sub>O<sub>4</sub>S<sub>2</sub>, light yellow block crystal, CCDC number: 2142731.

## Datablock: zzc-1

---

|                                         |                                                            |                                |
|-----------------------------------------|------------------------------------------------------------|--------------------------------|
| Bond precision:                         | C-C = 0.0040 Å                                             | Wavelength=1.54184             |
| Cell:                                   | a=10.3322(2)      b=10.7423(2)      c=14.3583(2)           |                                |
|                                         | alpha=97.245(2)      beta=100.734(2)      gamma=116.704(2) |                                |
| Temperature:                            | 298 K                                                      |                                |
|                                         | Calculated                                                 | Reported                       |
| Volume                                  | 1358.21(5)                                                 | 1358.21(5)                     |
| Space group                             | P -1                                                       | P -1                           |
| Hall group                              | -P 1                                                       | -P 1                           |
| Moiety formula                          | C31 H22 N4 O4 S2                                           | 0.33(C31 H22 N4 O4 S2)         |
| Sum formula                             | C31 H22 N4 O4 S2                                           | C10.33 H7.33 N1.33 O1.33 S0.67 |
| Mr                                      | 578.65                                                     | 192.88                         |
| Dx, g cm <sup>-3</sup>                  | 1.415                                                      | 1.415                          |
| Z                                       | 2                                                          | 6                              |
| Mu (mm <sup>-1</sup> )                  | 2.157                                                      | 2.157                          |
| F000                                    | 600.0                                                      | 600.0                          |
| F000'                                   | 603.00                                                     |                                |
| h, k, lmax                              | 12, 13, 17                                                 | 12, 13, 17                     |
| Nref                                    | 5506                                                       | 5313                           |
| Tmin, Tmax                              |                                                            | 0.736, 1.000                   |
| Tmin'                                   |                                                            |                                |
| Correction method= # Reported T Limits: | Tmin=0.736 Tmax=1.000 AbsCorr =                            |                                |
| MULTI-SCAN                              |                                                            |                                |
| Data completeness= 0.965                | Theta(max)= 74.179                                         |                                |
| R(reflections)= 0.0683( 4260)           | wR2(reflections)= 0.2069( 5313)                            |                                |
| S = 1.049                               | Npar= 373                                                  |                                |

---

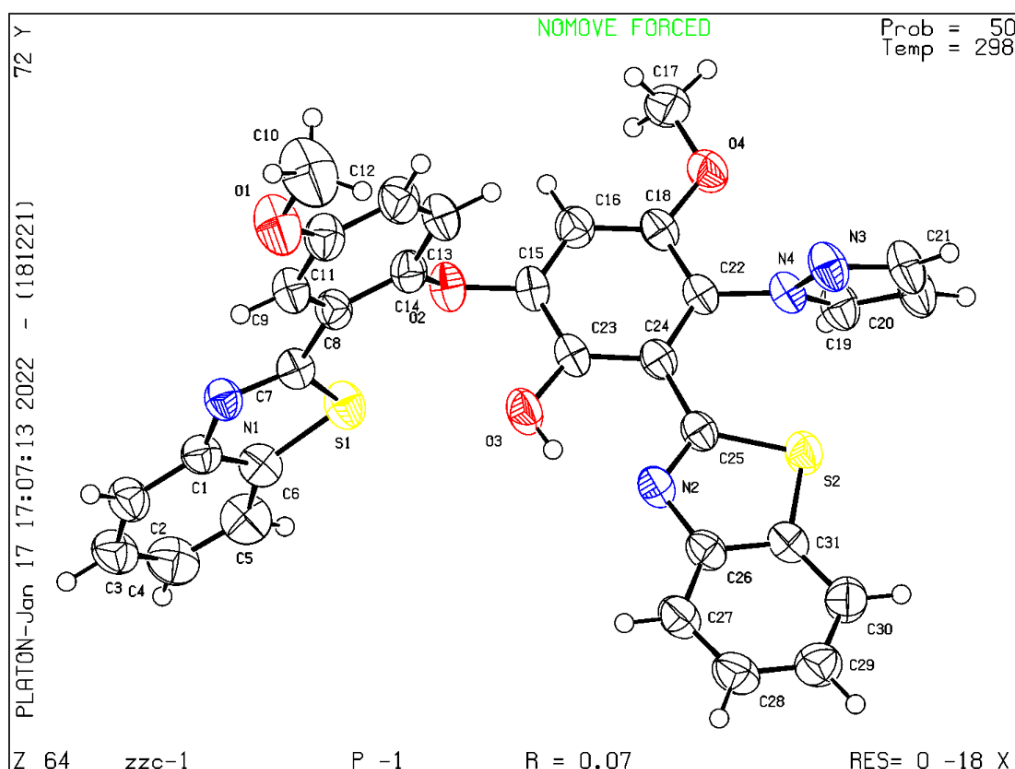

**2-(Benzo[d]thiazol-2-yl)-6-(2-(benzo[d]thiazol-2-yl)-4-methoxyphenoxy)-4-methoxy-3-(4-methyl-1H-pyrazol-1-yl)phenol (3f)**

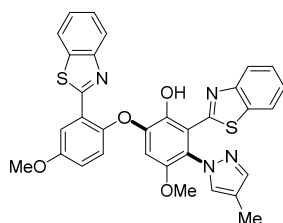

Yellow solid (49 mg, 67 % yield, electrolysis time: 7.5 h,  $R_f = 0.21$  (petroleum ether/ethyl acetate = 5 : 1 (v/v))); M.P. 272.4-274.2 °C; NMR Spectroscopy:  $^1\text{H}$  NMR (300 MHz,  $\text{CDCl}_3$ , 25 °C,  $\delta$ ): 13.96 (s, 1H), 8.18 – 8.17 (m, 1H), 8.13 (d,  $J = 7.8$  Hz, 1H), 7.94 (d,  $J = 8.1$  Hz, 1H), 7.89 (d,  $J = 7.5$  Hz, 1H), 7.77 (d,  $J = 7.5$  Hz, 1H), 7.73 (s, 1H), 7.52 - 7.43 (m, 2H), 7.39 - 7.34 (m, 3H), 7.06 - 7.00 (m, 2H), 6.86 (s, 1H), 3.96 (s, 3H), 3.60 (s, 3H), 2.27 (s, 3H).  $^{13}\text{C}$  NMR (75 MHz,  $\text{CDCl}_3$ , 25 °C,  $\delta$ ): 164.9, 162.5, 155.9, 152.3, 149.3, 149.1, 148.8, 145.9, 145.2, 142.9, 136.5, 134.2, 132.0, 126.7, 126.1, 125.9, 125.1, 123.3, 123.1, 122.1, 121.6, 121.3, 119.6, 119.2, 118.6, 116.8, 112.6, 107.6, 57.3, 56.1, 9.3. Mass Spectrometry: HRMS (ESI-TOF) (m/z): calcd for  $\text{C}_{32}\text{H}_{26}\text{N}_4\text{O}_4\text{S}_2^+$  ( $[\text{M} + \text{H}]^+$ ), 593.1312, found, 593.1327.

**2-(Benzo[d]thiazol-2-yl)-6-(2-(benzo[d]thiazol-2-yl)-4-methoxyphenoxy)-4-methoxy-3-(4-nitro-1H-pyrazol-1-yl)phenol (3g)**

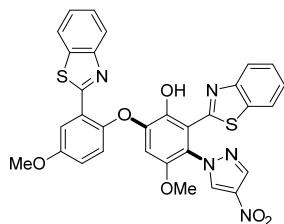

Yellow solid (50 mg, 64 % yield, electrolysis time: 6.3 h,  $R_f = 0.16$  (petroleum ether/ethyl acetate = 3 : 1 (v/v))); M.P. 286.5-289.6 °C; NMR Spectroscopy:  $^1\text{H}$  NMR (300 MHz,  $\text{CDCl}_3$ , 25 °C,  $\delta$ ): 13.80 (s, 1H), 8.42 (d,  $J = 3.3$  Hz, 2H), 8.14 (d,  $J = 2.7$  Hz, 1H), 8.11 (d,  $J = 8.1$  Hz, 1H), 7.96 (d,  $J = 7.8$  Hz, 1H), 7.87 (d,  $J = 7.8$  Hz, 1H), 7.79 (d,  $J = 7.8$  Hz, 1H), 7.52 - 7.41 (m, 3H), 7.39 - 7.31 (m, 1H), 7.07 - 6.98 (m, 2H), 6.84 (s, 1H), 3.93 (s, 3H), 3.59 (s, 3H).  $^{13}\text{C}$  NMR (75 MHz,  $\text{CDCl}_3$ , 25 °C,  $\delta$ ): 163.4, 162.2, 156.3, 152.2, 149.1, 148.6, 147.9, 147.1, 145.0, 137.7, 136.3, 133.8, 133.3, 127.2, 126.5, 126.2, 125.5, 125.2, 123.1, 122.4, 121.5, 121.4, 120.2, 119.2, 115.8, 112.7, 106.3, 56.9, 56.0. Mass Spectrometry: HRMS (ESI-TOF) ( $m/z$ ): calcd for  $\text{C}_{31}\text{H}_{22}\text{N}_5\text{O}_6\text{S}_2^+$  ( $[\text{M} + \text{H}]^+$ ), 624.1006, found, 624.1005.

**1-(2-(benzo[d]thiazol-2-yl)-4-(2-(benzo[d]thiazol-2-yl)-4-methoxyphenoxy)-3-hydroxy-6-methoxyphenyl)-1H-pyrazole-4-carbonitrile (3h)**

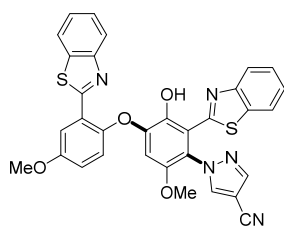

Yellow solid (52 mg, 68 % yield, electrolysis time: 7.1 h,  $R_f = 0.10$  (petroleum ether/ethyl acetate = 3 : 1 (v/v))); M.P. 267.2-271.4 °C; NMR Spectroscopy:  $^1\text{H}$  NMR (300 MHz,  $\text{CDCl}_3$ , 25 °C,  $\delta$ ): 13.86 (s, 1H), 8.15 (s, 2H), 8.12 (d,  $J = 8.1$  Hz, 1H), 8.08 (s, 1H), 7.98 (d,  $J = 8.1$  Hz, 1H), 7.88 (d,  $J = 7.8$  Hz, 1H), 7.81 (d,  $J = 7.5$  Hz, 1H), 7.79 (d,  $J = 7.8$  Hz, 1H), 7.54 - 7.46 (m, 2H), 7.45 - 7.40 (m, 1H), 7.38 - 7.33 (m, 1H), 7.07 - 6.99 (m, 2H), 6.80 (s, 1H), 3.95 (s, 3H), 3.58 (s, 3H).  $^{13}\text{C}$  NMR (75 MHz,  $\text{CDCl}_3$ , 25 °C,  $\delta$ ): 163.6, 162.3, 156.4, 152.3, 149.2, 148.8, 148.0, 147.6, 145.1, 144.1, 139.6, 136.4, 133.4, 127.2, 126.5, 126.3, 125.5, 125.2, 123.2, 122.4, 121.6, 121.4, 120.3, 120.2, 119.3, 116.1, 113.2, 112.8, 106.4, 94.9, 57.0, 56.1. Mass Spectrometry: HRMS (ESI-TOF) ( $m/z$ ): calcd for  $\text{C}_{32}\text{H}_{22}\text{N}_5\text{O}_4\text{S}_2^+$  ( $[\text{M} + \text{H}]^+$ ), 604.1108, found, 604.1120.

**Ethyl 1-(2-(benzo[d]thiazol-2-yl)-4-(2-(benzo[d]thiazol-2-yl)-4-methoxyphenoxy)-3-hydroxy-6-methoxyphenyl)-1H-pyrazole-4-carboxylate (3i)**

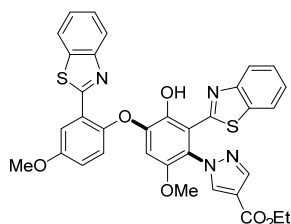

Yellow solid (37 mg, 46 % yield, electrolysis time: 6.4 h,  $R_f = 0.32$  (petroleum ether/ethyl acetate = 5 : 1 (v/v)); M.P. 265.1-269.8 °C; NMR Spectroscopy:  $^1\text{H}$  NMR (300 MHz,  $\text{CDCl}_3$ , 25 °C,  $\delta$ ): 13.93 (s, 1H), 8.29 (s, 1H), 8.16 (d,  $J = 2.1$  Hz, 1H), 8.12 (d,  $J = 8.4$  Hz, 2H), 7.95 (d,  $J = 8.1$  Hz, 1H), 7.95 (d,  $J = 7.5$  Hz, 1H), 7.88 (d,  $J = 7.5$  Hz, 1H), 7.77 (d,  $J = 7.8$  Hz, 1H), 7.51 - 7.45 (m, 2H), 7.41 - 7.33 (m, 2H), 7.07 - 6.99 (m, 2H), 6.84 (s, 1H), 4.41 - 4.34 (q,  $J = 9$  Hz, 2H), 3.95 (s, 3H), 3.59 (s, 3H), 1.39 (t,  $J = 9$  Hz, 3H).  $^{13}\text{C}$  NMR (75 MHz,  $\text{CDCl}_3$ , 25 °C,  $\delta$ ): 164.2, 162.9, 162.3, 156.2, 152.3, 149.1, 148.9, 148.4, 146.9, 145.1, 143.1, 137.6, 136.4, 133.7, 126.9, 126.2, 126.1, 125.3, 125.1, 123.1, 122.2, 121.6, 121.5, 121.3, 119.9, 117.5, 116.2, 112.6, 106.9, 60.7, 57.1, 56.0, 14.5. Mass Spectrometry: HRMS (ESI-TOF) (m/z): calcd for  $\text{C}_{34}\text{H}_{27}\text{N}_4\text{O}_6\text{S}_2^+$  ( $[\text{M} + \text{H}]^+$ ), 651.1367, found, 651.1351.

**2-(Benzo[d]thiazol-2-yl)-6-(2-(benzo[d]thiazol-2-yl)-4-methoxyphenoxy)-4-methoxy-3-(3-phenyl-1H-pyrazol-1-yl)phenol (3j)**

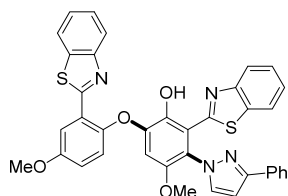

Yellow solid (63 mg, 76 % yield, electrolysis time: 7.5 h,  $R_f = 0.29$  (petroleum ether/ethyl acetate = 5 : 1 (v/v)); M.P. 276.4-279.1 °C; NMR Spectroscopy:  $^1\text{H}$  NMR (300 MHz,  $\text{CDCl}_3$ , 25 °C,  $\delta$ ): 14.12 (s, 1H), 8.18 (d,  $J = 2.4$  Hz, 1H), 8.14 (d,  $J = 8.1$  Hz, 1H), 7.98 - 7.89 (m, 4H), 7.72 (d,  $J = 7.8$  Hz, 1H), 7.62 (d,  $J = 2.4$  Hz, 1H), 7.53 - 7.48 (m, 1H), 7.47 - 7.43 (m, 2H), 7.40 - 7.32 (m, 4H), 7.09 - 7.01 (m, 2H), 6.95 (d,  $J = 2.4$  Hz, 1H), 6.87 (s, 1H), 3.97 (s, 3H), 3.61 (s, 3H).  $^{13}\text{C}$  NMR (75 MHz,  $\text{CDCl}_3$ , 25 °C,  $\delta$ ): 164.9, 162.5, 156.1, 154.0, 152.4, 149.4, 149.1, 148.7, 146.4, 145.4, 136.6, 135.1, 134.2, 133.1, 128.8, 128.3, 126.8, 126.2, 125.9, 125.3, 125.1, 123.1, 122.9, 122.2, 121.7, 121.4, 119.9, 119.3, 116.8, 112.6, 107.6, 105.4, 57.4, 56.1. Mass Spectrometry: HRMS (ESI-TOF) (m/z): calcd for  $\text{C}_{37}\text{H}_{27}\text{N}_4\text{O}_4\text{S}_2^+$  ( $[\text{M} + \text{H}]^+$ ), 655.1468, found, 655.1478.

**2-(Benzo[d]thiazol-2-yl)-6-(2-(benzo[d]thiazol-2-yl)-4-methoxyphenoxy)-3-(3,5-dimethyl-1H-pyrazol-1-yl)-4-methoxyphenol (3k)**

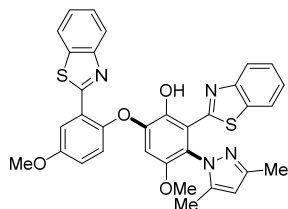

Yellow solid (62 mg, 81 % yield, electrolysis time: 6.8 h,  $R_f = 0.27$  (petroleum ether/ethyl acetate = 3 : 1 (v/v)); M.P. 252.6-255.3 °C; NMR Spectroscopy:  $^1\text{H}$  NMR (300 MHz,  $\text{CDCl}_3$ , 25 °C,  $\delta$ ): 14.16 (s, 1H), 7.18 (t,  $J = 1.5$  Hz, 1H), 8.13 (d,  $J = 8.1$  Hz, 1H), 7.94 (d,  $J = 8.1$  Hz, 1H), 7.89 (d,  $J = 7.8$  Hz, 1H), 7.79 (d,  $J = 7.8$  Hz, 1H),

7.52 - 7.43 (m, 2H), 7.39 - 7.34 (m, 2H), 7.02 (d,  $J = 1.5$  Hz, 2H), 6.88 (s, 1H), 6.18 (s, 1H), 3.95 (s, 3H), 3.62 (s, 3H), 2.37 (s, 3H), 2.06 (s, 3H).  $^{13}\text{C}$  NMR (75 MHz,  $\text{CDCl}_3$ , 25 °C,  $\delta$ ): 165.1, 162.5, 155.9, 152.3, 151.3, 149.2, 149.1, 148.9, 145.8, 145.5, 143.0, 136.5, 134.2, 126.7, 126.1, 125.9, 125.0, 124.8, 123.0, 122.1, 121.6, 121.3, 119.4, 119.1, 117.0, 112.6, 107.7, 107.0, 57.0, 56.0, 14.0, 11.2. Mass Spectrometry: HRMS (ESI-TOF) ( $m/z$ ): calcd for  $\text{C}_{33}\text{H}_{27}\text{N}_4\text{O}_4\text{S}_2^+$  ( $[\text{M} + \text{H}]^+$ ), 607.1468, found, 607.1477.

**2-(Benzo[d]thiazol-2-yl)-6-(2-(benzo[d]thiazol-2-yl)-4-methoxyphenoxy)-3-(3,5-di phenyl-1H-pyrazol-1-yl)-4-methoxyphenol (3l)**

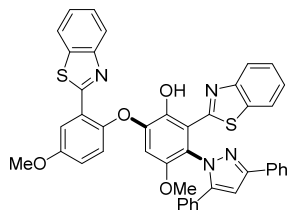

Yellow solid (82 mg, 90 % yield, electrolysis time: 7.6 h,  $R_f = 0.23$  (petroleum ether/ethyl acetate = 5 : 1 (v/v))); M.P. 255.3-258.8 °C; NMR Spectroscopy:  $^1\text{H}$  NMR (300 MHz,  $\text{CDCl}_3$ , 25 °C,  $\delta$ ): 14.25 (s, 1H), 8.16 - 8.12 (m, 2H), 7.98 - 7.91 (m, 4H), 7.75 (d,  $J = 7.8$  Hz, 1H), 7.51 - 7.44 (m, 3H), 7.41 - 7.36 (m, 3H), 7.33 - 7.29 (m, 2H), 7.26 - 7.22 (m, 4H), 7.09 (s, 1H), 7.01 (s, 2H), 6.77 (s, 1H), 3.96 (s, 3H), 3.42 (s, 3H).  $^{13}\text{C}$  NMR (75 MHz,  $\text{CDCl}_3$ , 25 °C,  $\delta$ ): 165.1, 162.6, 156.0, 154.0, 152.4, 149.2, 149.0, 148.9, 147.8, 146.1, 145.8, 136.6, 134.2, 133.1, 129.9, 128.8, 128.7, 128.6, 128.4, 127.6, 126.9, 126.2, 126.0, 125.1, 124.9, 123.2, 122.7, 122.2, 121.7, 121.5, 119.5, 119.2, 117.1, 112.8, 108.1, 104.9, 57.0, 56.1. Mass Spectrometry: HRMS (ESI-TOF) ( $m/z$ ): calcd for  $\text{C}_{43}\text{H}_{31}\text{N}_4\text{O}_4\text{S}_2^+$  ( $[\text{M} + \text{H}]^+$ ), 731.1781, found, 731.1791.

**2-(Benzo[d]thiazol-2-yl)-6-(2-(benzo[d]thiazol-2-yl)-4-methoxyphenoxy)-3-(4-bromo-3-methyl-1H-pyrazol-1-yl)-4-methoxyphenol (3m)**

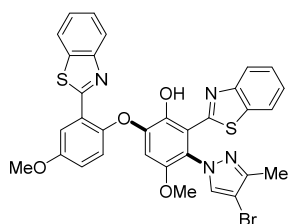

Yellow solid (51 mg, 61 % yield, electrolysis time: 6.8 h,  $R_f = 0.18$  (petroleum ether/ethyl acetate = 5 : 1 (v/v))); M.P. 271.6-273.8 °C; NMR Spectroscopy:  $^1\text{H}$  NMR (300 MHz,  $\text{CDCl}_3$ , 25 °C,  $\delta$ ): 13.98 (s, 1H), 8.17 (s, 1H), 8.12 (d,  $J = 8.4$  Hz, 1H), 7.96 (d,  $J = 8.1$  Hz, 1H), 7.89 (d,  $J = 8.1$  Hz, 1H), 7.83 (d,  $J = 8.4$  Hz, 1H), 7.57 (s, 1H), 7.52 - 7.46 (m, 2H), 7.42 - 7.34 (m, 2H), 7.04 - 7.02 (m, 2H), 6.82 (s, 1H), 3.96 (s, 3H), 3.60 (s, 3H), 2.40 (s, 3H).  $^{13}\text{C}$  NMR (75 MHz,  $\text{CDCl}_3$ , 25 °C,  $\delta$ ): 164.5, 162.4, 156.0, 152.2, 150.3, 149.1, 149.0, 148.5, 146.4, 145.1, 136.4, 134.0, 133.9, 126.8, 126.1, 126.0, 125.1, 125.0, 123.0, 122.1, 121.5, 121.3, 119.8, 116.5, 112.6, 106.9, 96.2, 56.9, 55.9, 12.3. Mass Spectrometry: HRMS (ESI-TOF) ( $m/z$ ): calcd for  $\text{C}_{32}\text{H}_{24}\text{BrN}_4\text{O}_4\text{S}_2^+$  ( $[\text{M} + \text{H}]^+$ ), 671.0417, found, 671.0410.

**2-(Benzo[d]thiazol-2-yl)-6-(2-(benzo[d]thiazol-2-yl)-4-methoxyphenoxy)-3-(1*H*-imidazol-1-yl)-4-methoxyphenol (3n)**

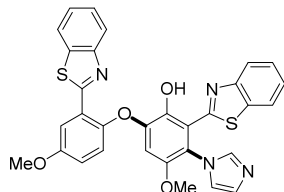

Yellow solid (48 mg, 66 % yield, electrolysis time: 7.9 h,  $R_f = 0.14$  (petroleum ether/ethyl acetate = 1 : 1 (v/v))); M.P. 290.0-292.9 °C; NMR Spectroscopy:  $^1\text{H}$  NMR (300 MHz,  $\text{CDCl}_3$ , 25 °C,  $\delta$ ): 14.00 (s, 1H), 8.16 (d,  $J = 2.4$  Hz, 1H), 8.12 (d,  $J = 8.1$  Hz, 1H), 7.96 (d,  $J = 8.1$  Hz, 1H), 7.88 (d,  $J = 7.8$  Hz, 1H), 7.77 (d,  $J = 7.8$  Hz, 1H), 7.56 (s, 1H), 7.49 (t,  $J = 7.2$  Hz, 2H), 7.42 - 7.33 (m, 3H), 7.08 - 7.00 (m, 2H), 6.96 (s, 1H), 6.84 (s, 1H), 3.96 (s, 3H), 3.59 (s, 3H).  $^{13}\text{C}$  NMR (75 MHz,  $\text{CDCl}_3$ , 25 °C,  $\delta$ ): 164.3, 162.3, 156.1, 152.2, 148.9, 148.6, 148.4, 146.2, 145.0, 138.7, 136.4, 133.7, 130.4, 126.9, 126.2, 126.1, 125.2, 125.1, 123.1, 122.1, 121.5, 121.4, 119.8, 119.2, 118.9, 116.2, 112.6, 106.8, 56.8, 55.9. Mass Spectrometry: HRMS (ESI-TOF) ( $m/z$ ): calcd for  $\text{C}_{31}\text{H}_{23}\text{N}_4\text{O}_4\text{S}_2^+$  ( $[\text{M} + \text{H}]^+$ ), 579.1155, found, 579.1157.

**2-(Benzo[d]thiazol-2-yl)-6-(2-(benzo[d]thiazol-2-yl)-4-methoxyphenoxy)-4-methoxy-3-(1*H*-1,2,4-triazol-1-yl)phenol (3o)**

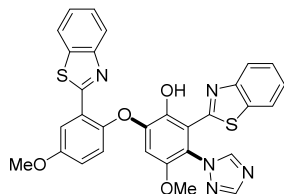

Yellow solid (40 mg, 56 % yield, electrolysis time: 8.0 h,  $R_f = 0.45$  (petroleum ether/ethyl acetate = 1 : 1 (v/v))); M.P. 282.4-288.3 °C; NMR Spectroscopy:  $^1\text{H}$  NMR (300 MHz,  $\text{CDCl}_3$ , 25 °C,  $\delta$ ): 13.93 (s, 1H), 8.32 (d,  $J = 9$  Hz, 2H), 8.15 (d,  $J = 2.1$  Hz, 1H), 8.11 (d,  $J = 6$  Hz, 1H), 7.96 (d,  $J = 6.3$  Hz, 1H), 7.88 (d,  $J = 6$  Hz, 1H), 7.75 (d,  $J = 6$  Hz, 1H), 7.51 - 7.46 (m, 2H), 7.41 - 7.33 (m, 2H), 7.07 - 7.01 (m, 2H), 6.82 (s, 1H), 3.95 (s, 3H), 3.57 (s, 3H).  $^{13}\text{C}$  NMR (75 MHz,  $\text{CDCl}_3$ , 25 °C,  $\delta$ ): 163.9, 162.3, 156.3, 153.5, 152.3, 149.1, 148.9, 148.2, 147.6, 147.1, 145.2, 136.4, 133.4, 127.2, 126.4, 126.2, 125.5, 125.2, 123.2, 122.4, 121.6, 121.4, 120.2, 119.3, 118.2, 116.2, 112.8, 106.5, 57.0, 56.1. Mass Spectrometry: HRMS (ESI-TOF) ( $m/z$ ): calcd for  $\text{C}_{30}\text{H}_{22}\text{N}_5\text{O}_4\text{S}_2^+$  ( $[\text{M} + \text{H}]^+$ ), 580.1108, found, 580.1108.

**2-(Benzo[d]thiazol-2-yl)-6-(2-(benzo[d]thiazol-2-yl)-4-methoxyphenoxy)-4-methoxy-3-(1*H*-tetrazol-1-yl)phenol (3p)**

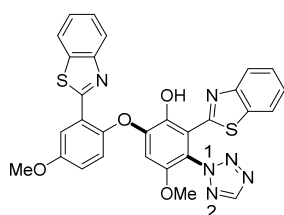



isomer 1, Yellow solid (10 mg, 14 % yield, electrolysis time: 6.0 h,  $R_f = 0.35$  (petroleum ether/ethyl acetate = 3 : 1 (v/v)); M.P. 297.6-301.2 °C; NMR Spectroscopy:  $^1\text{H}$  NMR (300 MHz,  $\text{CDCl}_3$ , 25 °C,  $\delta$ ): 13.75 (s, 1H), 8.93 (s, 1H), 8.17 (d,  $J = 2.7$  Hz, 1H), 8.12 (d,  $J = 8.1$  Hz, 1H), 7.99 (d,  $J = 8.1$  Hz, 1H), 7.90 (d,  $J = 7.5$  Hz, 1H), 7.74 (d,  $J = 7.5$  Hz, 1H), 7.54 - 7.48 (m, 2H), 7.43 - 7.35 (m, 2H), 7.12 - 7.04 (m, 2H), 6.84 (s, 1H), 3.98 (s, 3H), 3.59 (s, 3H).  $^{13}\text{C}$  NMR (75 MHz,  $\text{CDCl}_3$ , 25 °C,  $\delta$ ): 163.2, 162.2, 156.6, 153.9, 152.3, 149.3, 149.1, 148.8, 147.9, 145.1, 136.4, 133.2, 127.3, 126.6, 126.3, 125.8, 125.3, 123.2, 122.5, 121.7, 121.4, 120.6, 119.3, 118.0, 115.8, 112.9, 106.2, 57.2, 56.1. Mass Spectrometry: HRMS (ESI-TOF) ( $m/z$ ): calcd for  $\text{C}_{29}\text{H}_{20}\text{N}_6\text{O}_4\text{S}_2^+$  ( $[\text{M} + \text{H}]^+$ ), 581.1060, found, 581.1072. isomer 2, Yellow solid (24 mg, 32 % yield, electrolysis time: 6.0 h,  $R_f = 0.25$  (petroleum ether/ethyl acetate = 3 : 1 (v/v)); M.P. 295.4-296.9 °C; NMR Spectroscopy:  $^1\text{H}$  NMR (300 MHz,  $(\text{CD}_3)_2\text{SO}$ , 25 °C,  $\delta$ ): 11.7 (s, 1H), 9.8 (s, 1H), (s, 1H), 8.18 - 8.11 (m, 3H), 8.07 - 8.06 (m, 1H), 7.85 - 7.82 (m, 1H), 7.60 - 7.53 (m, 1H), 7.52 - 7.44 (m, 3H), 7.22 (d,  $J = 1.1$  Hz, 2H), 7.18 (s, 1H), 3.91 (s, 3H), 3.63 (s, 3H).  $^{13}\text{C}$  NMR (75 MHz,  $(\text{CD}_3)_2\text{SO}$ , 25 °C,  $\delta$ ): 161.6, 160.1, 155.7, 151.6, 150.5, 148.3, 147.9, 147.3, 146.6, 142.5, 135.5, 134.3, 126.6, 126.5, 126.0, 125.4, 124.7, 122.7, 122.1, 121.9, 120.4, 119.2, 118.8, 115.7, 112.2, 106.6, 57.2, 55.8. Mass Spectrometry: HRMS (ESI-TOF) ( $m/z$ ): calcd for  $\text{C}_{29}\text{H}_{21}\text{N}_6\text{O}_4\text{S}_2^+$  ( $[\text{M} + \text{H}]^+$ ), 581.1060, found, 581.1072.

**2-(Benzo[*d*]thiazol-2-yl)-6-(2-(benzo[*d*]thiazol-2-yl)-4-methoxyphenoxy)-4-methoxy-3-(5-methyl-1*H*-tetrazol-1-yl)phenol (3q)**

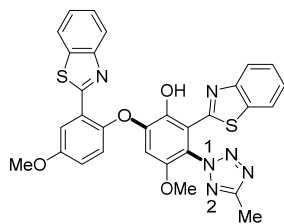

isomer 1, Yellow solid (23 mg, 31 % yield, electrolysis time: 6.3 h,  $R_f = 0.32$  (petroleum ether/ethyl acetate = 3 : 1 (v/v)); M.P. 271.1-276.7 °C; NMR Spectroscopy:  $^1\text{H}$  NMR (300 MHz,  $\text{CDCl}_3$ , 25 °C,  $\delta$ ): 13.84 (s, 1H), 8.17 (d,  $J = 2.1$  Hz, 1H), 8.13 (d,  $J = 7.8$  Hz, 1H), 7.99 (d,  $J = 8.1$  Hz, 1H), 7.89 (d,  $J = 7.5$  Hz, 1H), 7.76 (d,  $J = 7.5$  Hz, 1H), 7.54 - 7.48 (m, 2H), 7.43 - 7.35 (m, 2H), 7.10 - 7.03 (m, 2H), 6.83 (s, 1H), 3.97 (s, 3H), 3.60 (s, 3H), 2.77 (s, 3H).  $^{13}\text{C}$  NMR (75 MHz,  $\text{CDCl}_3$ , 25 °C,  $\delta$ ): 164.2, 163.4, 162.3, 156.5, 152.3, 149.3, 149.1, 148.5, 147.9, 145.0, 136.4, 133.3, 127.3, 126.5, 126.3, 125.7, 125.3, 123.2, 122.5, 121.7, 121.4, 120.5, 119.3, 118.4, 115.9, 112.9, 106.3, 57.1, 56.1, 11.4. Mass Spectrometry: HRMS (ESI-TOF) ( $m/z$ ): calcd for  $\text{C}_{30}\text{H}_{22}\text{N}_6\text{O}_4\text{S}_2^+$  ( $[\text{M} + \text{H}]^+$ ), 595.1217, found, 595.1230. isomer 2, Yellow solid (19 mg, 26 % yield, electrolysis time: 6.3 h,  $R_f = 0.23$  (petroleum ether/ethyl acetate = 3 : 1 (v/v)); M.P. 275.3-278.1 °C; NMR Spectroscopy:  $^1\text{H}$  NMR (300 MHz,  $(\text{CD}_3)_2\text{SO}$ , 25 °C,  $\delta$ ): 11.90 (s, 1H), 8.18 - 8.11 (m, 3H), 8.07 (d,  $J = 3$  Hz, 1H), 7.88 - 7.85 (m, 1H), 7.59 - 7.44 (m, 4H), 7.28 - 7.18 (m, 3H), 3.91 (s, 3H), 3.67 (s, 3H), 2.44 (s, 3H).  $^{13}\text{C}$  NMR (75 MHz,  $(\text{CD}_3)_2\text{SO}$ , 25 °C,  $\delta$ ): 161.7, 160.3, 155.6, 154.8, 151.6, 150.4, 148.3, 148.1, 147.3, 142.9, 135.6, 134.2, 126.7, 126.5, 126.1, 125.4, 124.4, 122.7,

122.6, 122.1, 121.9, 120.2, 119.1, 118.7, 114.7, 112.2, 107.1, 57.1, 55.8, 8.3. Mass Spectrometry: HRMS (ESI-TOF) (m/z): calcd for  $C_{30}H_{23}N_6O_4S_2^+$  ( $[M + H]^+$ ), 595.1217, found, 595.1228.

**2-(Benzo[d]thiazol-2-yl)-6-(2-(benzo[d]thiazol-2-yl)-4-methoxyphenoxy)-4-methoxy-3-(5-phenyl-2H-tetrazol-2-yl)phenol (3r)**

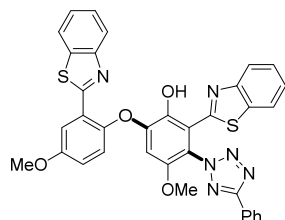

Yellow solid (39 mg, 48 % yield, electrolysis time: 7.7 h,  $R_f = 0.41$  (petroleum ether/ethyl acetate = 3 : 1 (v/v))); M.P. 272.9-275.7 °C; NMR Spectroscopy:  $^1H$  NMR (300 MHz,  $CDCl_3$ , 25 °C,  $\delta$ ): 13.85 (s, 1H), 8.33 (d,  $J = 4.2$  Hz, 2H), 8.18 (d,  $J = 1.5$  Hz, 1H), 8.13 (d,  $J = 8.1$  Hz, 1H), 8.00 (d,  $J = 8.1$  Hz, 1H), 7.92 (d,  $J = 7.8$  Hz, 1H), 7.72 (d,  $J = 8.4$  Hz, 1H), 7.55 - 7.49 (m, 5H), 7.41 - 7.36 (m, 2H), 7.12 - 7.09 (m, 2H), 6.85 (s, 1H), 3.99 (s, 3H), 3.61 (s, 3H).  $^{13}C$  NMR (75 MHz,  $CDCl_3$ , 25 °C,  $\delta$ ): 166.2, 163.4, 162.3, 156.6, 152.4, 149.3, 149.2, 148.8, 147.9, 145.1, 136.5, 133.3, 139.0, 129.2, 127.4, 127.3, 127.2, 126.5, 126.3, 125.9, 125.3, 123.2, 122.5, 121.7, 121.5, 120.6, 119.4, 118.3, 115.9, 112.9, 106.3, 57.2, 56.2. Mass Spectrometry: HRMS (ESI-TOF) (m/z): calcd for  $C_{35}H_{25}N_6O_4S_2^+$  ( $[M + H]^+$ ), 657.1373, found, 657.1383.

**2-(Benzo[d]thiazol-2-yl)-6-(2-(benzo[d]thiazol-2-yl)-4-methoxyphenoxy)-3-(5-chloro-1H-indazol-1-yl)-4-methoxyphenol (3s)**

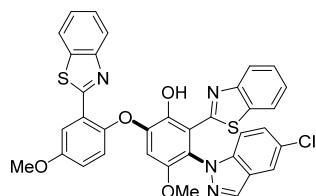

Yellow solid (46 mg, 56 % yield, electrolysis time: 7.8 h,  $R_f = 0.31$  (petroleum ether/ethyl acetate = 3 : 1 (v/v))); M.P. 284.8-287.7 °C; NMR Spectroscopy:  $^1H$  NMR (300 MHz,  $CDCl_3$ , 25 °C,  $\delta$ ): 14.02 (s, 1H), 8.18 (d,  $J = 2.7$  Hz, 1H), 8.14 - 8.12 (m, 2H), 7.96 - 7.89 (m, 2H), 7.79 - 7.75 (m, 2H), 7.62 (d,  $J = 8.1$  Hz, 1H), 7.53 - 7.42 (m, 2H), 7.39 - 7.29 (m, 3H), 7.09 - 7.02 (m, 2H), 6.87 (s, 1H), 3.96 (s, 3H), 3.55 (s, 3H).  $^{13}C$  NMR (75 MHz,  $CDCl_3$ , 25 °C,  $\delta$ ): 164.3, 162.4, 156.2, 152.3, 149.0, 148.6, 148.5, 147.0, 145.2, 136.5, 133.8, 128.6, 128.4, 127.5, 126.9, 126.2, 126.1, 125.4, 125.2, 123.3, 123.2, 122.5, 122.2, 121.6, 121.4, 120.1, 120.0, 119.5, 119.3, 116.2, 112.7, 106.9, 57.1, 56.1. Mass Spectrometry: HRMS (ESI-TOF) (m/z): calcd for  $C_{35}H_{24}ClN_4O_4S_2^+$  ( $[M + H]^+$ ), 663.0922, found, 663.0932.

**2-(Benzo[d]thiazol-2-yl)-6-(2-(benzo[d]thiazol-2-yl)-4-methoxyphenoxy)-4-methoxy-3-(5-methoxy-1H-indazol-1-yl)phenol (3t)**

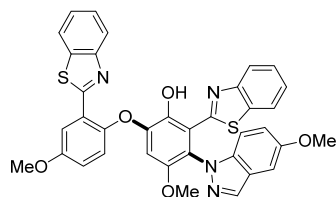

Yellow solid (45 mg, 55 % yield, electrolysis time: 6.4 h,  $R_f = 0.40$  (petroleum ether/ethyl acetate = 3 : 1 (v/v))); M.P. 280.4-285.8 °C; NMR Spectroscopy:  $^1\text{H}$  NMR (300 MHz,  $\text{CDCl}_3$ , 25 °C,  $\delta$ ): 14.06 (s, 1H), 8.18 (d,  $J = 2.4$  Hz, 1H), 8.13 (d,  $J = 8.1$  Hz, 1H), 8.01 (s, 1H), 7.92 (t,  $J = 9.3$  Hz, 2H), 7.72 (d,  $J = 9.3$  Hz, 1H), 7.61 (d,  $J = 7.8$  Hz, 1H), 7.53 - 7.28 (m, 5H), 7.13 - 7.09 (m, 1H), 7.06 - 7.04 (m, 2H), 6.99 (d,  $J = 2.1$  Hz, 1H), 6.88 (s, 1H), 3.96 (s, 3H), 3.89 (s, 3H), 3.55 (s, 3H).  $^{13}\text{C}$  NMR (75 MHz,  $\text{CDCl}_3$ , 25 °C,  $\delta$ ): 164.7, 162.5, 156.1, 155.7, 152.3, 149.0, 148.8, 148.7, 147.3, 146.6, 145.2, 136.5, 134.0, 126.8, 126.5, 126.2, 125.9, 125.2, 125.1, 123.2, 123.1, 122.9, 122.4, 122.2, 121.6, 119.9, 119.3, 116.4, 112.7, 107.2, 96.5, 57.2, 56.1, 55.5. Mass Spectrometry: HRMS (ESI-TOF) ( $m/z$ ): calcd for  $\text{C}_{36}\text{H}_{27}\text{N}_4\text{O}_5\text{S}_2^+$  ( $[\text{M} + \text{H}]^+$ ), 659.1417, found, 659.1419.

**3-(1H-benzo[d]imidazol-1-yl)-2-(benzo[d]thiazol-2-yl)-6-(2-(benzo[d]thiazol-2-yl)-4-methoxyphenoxy)-4-methoxyphenol (3u)**

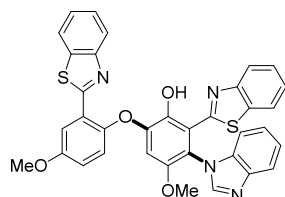

Yellow solid (77 mg, 98 % yield, electrolysis time: 6.6 h,  $R_f = 0.19$  (petroleum ether/ethyl acetate = 5 : 1 (v/v))); M.P. 276.8-280.7 °C; NMR Spectroscopy:  $^1\text{H}$  NMR (300 MHz,  $\text{CDCl}_3$ , 25 °C,  $\delta$ ): 14.07 (s, 1H), 8.19 (d,  $J = 3$  Hz, 1H), 8.14 (d,  $J = 8.1$  Hz, 1H), 7.97 - 7.89 (m, 4H), 7.57 (d,  $J = 6$  Hz, 1H), 7.52 - 7.49 (m, 1H), 7.46 (d,  $J = 9$  Hz, 1H), 7.42 - 7.33 (m, 3H), 7.29 (d,  $J = 9$  Hz, 1H), 7.24 (d,  $J = 9$  Hz, 1H), 7.13 - 7.03 (m, 3H), 6.91 (s, 1H), 3.96 (s, 3H), 3.49 (s, 3H).  $^{13}\text{C}$  NMR (75 MHz,  $\text{CDCl}_3$ , 25 °C,  $\delta$ ): 164.2, 162.4, 156.2, 152.3, 149.2, 148.9, 148.5, 146.6, 145.4, 144.3, 143.9, 136.5, 134.9, 133.4, 127.0, 126.2, 125.3, 125.2, 124.2, 123.2, 123.1, 122.1, 121.6, 121.5, 120.6, 119.9, 119.3, 116.9, 116.8, 112.7, 110.4, 107.1, 56.8, 56.1. Mass Spectrometry: HRMS (ESI-TOF) ( $m/z$ ): calcd for  $\text{C}_{35}\text{H}_{25}\text{N}_4\text{O}_4\text{S}_2^+$  ( $[\text{M} + \text{H}]^+$ ), 629.1312, found, 629.1329.

**3-(1H-benzo[d][1,2,3]triazol-1-yl)-2-(benzo[d]thiazol-2-yl)-6-(2-(benzo[d]thiazol-2-yl)-4-methoxyphenoxy)-4-methoxyphenol (3v)**

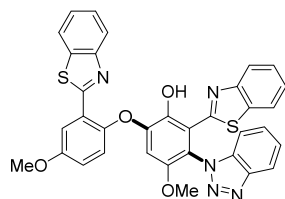

Yellow solid (74 mg, 94 % yield, electrolysis time: 7.8 h,  $R_f = 0.49$  (petroleum

ether/ethyl acetate = 3 : 1 (v/v)); M.P. 296.8-299.6 °C; NMR Spectroscopy: <sup>1</sup>H NMR (300 MHz, CDCl<sub>3</sub>, 25 °C, δ): 14.01 (s, 1H), 8.26 - 8.23 (m, 1H), 8.19 (d, *J* = 3 Hz, 1H), 8.14 (d, *J* = 8.1 Hz, 1H), 7.93 (t, *J* = 7.8 Hz, 2H), 7.57 (d, *J* = 6 Hz, 1H), 7.54 - 7.45 (m, 4H), 7.42 - 7.38 (m, 1H), 7.36 - 7.28 (m, 2H), 7.15 - 7.05 (m, 2H), 6.91 (s, 1H), 3.97 (s, 3H), 3.49 (s, 3H). <sup>13</sup>C NMR (75 MHz, CDCl<sub>3</sub>, 25 °C, δ): 163.9, 162.5, 156.3, 152.3, 149.2, 148.9, 148.2, 147.7, 146.2, 145.4, 136.4, 135.4, 128.8, 127.1, 126.3, 125.4, 125.3, 124.6, 123.1, 122.2, 121.6, 121.3, 120.3, 120.2, 119.3, 116.8, 116.7, 112.8, 110.0, 106.9, 56.9, 56.1. Mass Spectrometry: HRMS (ESI-TOF) (*m/z*): calcd for C<sub>34</sub>H<sub>24</sub>N<sub>5</sub>O<sub>4</sub>S<sub>2</sub><sup>+</sup> ([M + H]<sup>+</sup>), 630.1264, found, 630.1275.

**3-(4-Bromo-1*H*-pyrazol-1-yl)-2-(5-chlorobenzo[*d*]thiazol-2-yl)-6-(2-(5-chlorobenzo[*d*]thiazol-2-yl)-4-methoxyphenoxy)-4-methoxyphenol (3w)**

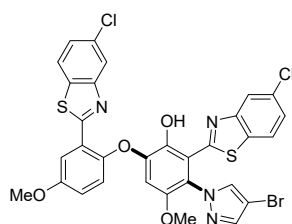

Yellow solid (57 mg, 63 % yield, electrolysis time: 7.8 h, *R<sub>f</sub>* = 0.11 (petroleum ether/ethyl acetate = 3 : 1 (v/v))); M.P. 285.9-289.4 °C; NMR Spectroscopy: <sup>1</sup>H NMR (300 MHz, CDCl<sub>3</sub>, 25 °C, δ): 13.61 (s, 1H), 8.13 - 8.12 (m, 1H), 7.92 (d, *J* = 1.8 Hz, 1H), 7.85 (s, 1H), 7.78 (d, *J* = 8.4 Hz, 1H), 7.71 (d, *J* = 8.7 Hz, 1H), 7.64 (s, 1H), 7.38 - 7.30 (m, 2H), 7.02 (s, 2H), 6.85 (s, 1H), 3.95 (s, 3H), 3.61 (s, 3H). <sup>13</sup>C NMR (75 MHz, CDCl<sub>3</sub>, 25 °C, δ): 166.0, 164.0, 156.1, 153.1, 149.9, 149.1, 148.4, 146.6, 145.1, 142.8, 134.6, 133.7, 133.0, 132.1, 126.7, 125.5, 124.8, 122.8, 122.2, 122.1, 121.9, 121.8, 119.7, 119.5, 116.1, 112.6, 107.3, 95.6, 57.1, 55.9. Mass Spectrometry: HRMS (ESI-TOF) (*m/z*): calcd for C<sub>31</sub>H<sub>20</sub>BrCl<sub>2</sub>N<sub>4</sub>O<sub>4</sub>S<sub>2</sub><sup>+</sup> ([M + H]<sup>+</sup>), 724.9481, found, 724.9474.

**2-(Benzo[*d*]oxazol-2-yl)-6-(2-(benzo[*d*]oxazol-2-yl)-4-methoxyphenoxy)-3-(4-bromo-1*H*-pyrazol-1-yl)-4-methoxyphenol (3x)**

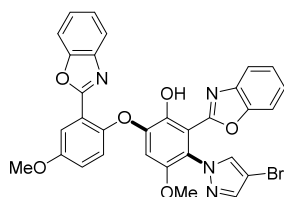

Light yellow solid (50 mg, 64 % yield, electrolysis time: 7.3 h, *R<sub>f</sub>* = 0.15 (petroleum ether/ethyl acetate = 3 : 1 (v/v))); M.P. 270.2-272.1 °C; NMR Spectroscopy: <sup>1</sup>H NMR (300 MHz, CDCl<sub>3</sub>, 25 °C, δ): 12.18 (s, 1H), 7.82 (d, *J* = 2.7 Hz, 1H), 7.79 - 7.76 (m, 1H), 7.70 - 7.66 (m, 3H), 7.55 - 7.52 (m, 1H), 7.36 - 7.28 (m, 5H), 7.12 - 7.04 (m, 2H), 6.88 (s, 1H), 3.92 (s, 3H), 3.64 (s, 3H). <sup>13</sup>C NMR (75 MHz, CDCl<sub>3</sub>, 25 °C, δ): 160.8, 160.5, 156.0, 150.8, 149.2, 148.8, 147.7, 145.1, 141.7, 140.9, 138.4, 132.9, 126.1, 125.4, 125.3, 124.6, 121.5, 121.4, 120.3, 119.6, 119.4, 119.3, 114.6, 110.9, 110.8, 110.6, 107.8, 93.8, 57.1, 56.0. Mass Spectrometry: HRMS (ESI-TOF) (*m/z*): calcd for

C<sub>31</sub>H<sub>22</sub>BrN<sub>4</sub>O<sub>6</sub><sup>+</sup> ([M + H]<sup>+</sup>), 625.0717, found, 625.0710.

**3-(4-Bromo-1*H*-pyrazol-1-yl)-4-methoxy-6-(4-methoxy-2-(5-methylbenzo[*d*]oxazol-2-yl)phenoxy)-2-(5-methylbenzo[*d*]oxazol-2-yl)phenol (3y)**

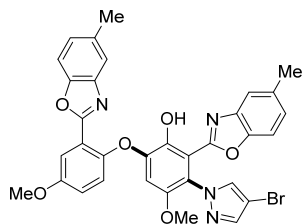

Light yellow solid (47 mg, 58 % yield, electrolysis time: 7.4 h,  $R_f = 0.19$  (petroleum ether/ethyl acetate = 3 : 1 (v/v))); M.P. 294.4-295.8 °C; NMR Spectroscopy: <sup>1</sup>H NMR (300 MHz, CDCl<sub>3</sub>, 25 °C,  $\delta$ ): 12.26 (s, 1H), 7.80 (d,  $J = 2.7$  Hz, 1H), 7.69 (s, 1H), 7.63 (s, 1H), 7.55 (s, 1H), 7.48 (s, 1H), 7.40 (d,  $J = 8.1$  Hz, 1H), 7.18 - 7.04 (m, 5H), 6.84 (s, 1H), 3.92 (s, 3H), 3.63 (s, 3H), 2.45 (s, 6H). <sup>13</sup>C NMR (75 MHz, CDCl<sub>3</sub>, 25 °C,  $\delta$ ): 160.9, 160.6, 156.1, 149.1, 148.8, 148.6, 147.8, 147.5, 145.0, 141.9, 141.0, 138.6, 135.4, 134.4, 133.0, 127.3, 126.6, 121.5, 121.3, 120.1, 119.5, 119.3, 114.5, 110.7, 110.3, 107.4, 93.8, 57.2, 56.1, 21.6. Mass Spectrometry: HRMS (ESI-TOF) (m/z): calcd for C<sub>33</sub>H<sub>26</sub>BrN<sub>4</sub>O<sub>6</sub><sup>+</sup> ([M + H]<sup>+</sup>), 653.1030, found, 653.1034.

**4-Methoxy-6-(4-methoxy-2-(5-methylbenzo[*d*]oxazol-2-yl)phenoxy)-2-(5-methylbenzo[*d*]oxazol-2-yl)-3-(1*H*-pyrazol-1-yl)phenol (3z)**

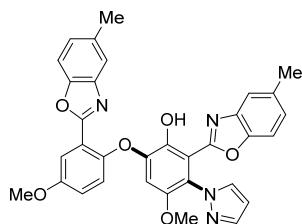

Light yellow solid (40 mg, 55 % yield, electrolysis time: 6.9 h,  $R_f = 0.21$  (petroleum ether/ethyl acetate = 3 : 1 (v/v))); M.P. 274.4-276.1 °C; NMR Spectroscopy: <sup>1</sup>H NMR (300 MHz, CDCl<sub>3</sub>, 25 °C,  $\delta$ ): 12.31 (s, 1H), 7.81 (d,  $J = 2.7$  Hz, 1H), 7.75 (d,  $J = 1.5$  Hz, 1H), 7.60 (d,  $J = 2.1$  Hz, 1H), 7.56 (s, 1H), 7.46 (s, 1H), 7.41 (d,  $J = 8.4$  Hz, 1H), 7.13 - 7.03 (m, 5H), 6.88 (s, 1H), 6.51 (t,  $J = 2.1$  Hz, 1H), 3.92 (s, 3H), 3.62 (s, 3H), 2.44 (d,  $J = 3.5$  Hz, 6H). <sup>13</sup>C NMR (75 MHz, CDCl<sub>3</sub>, 25 °C,  $\delta$ ): 160.9, 160.8, 155.8, 149.0, 148.8, 148.8, 147.4, 147.1, 145.0, 141.8, 140.4, 138.6, 135.1, 134.3, 132.7, 127.0, 126.4, 122.3, 121.2, 120.1, 119.4, 119.3, 119.1, 114.4, 110.9, 110.2, 110.1, 107.9, 106.1, 57.2, 55.9, 21.5, 21.4. Mass Spectrometry: HRMS (ESI-TOF) (m/z): calcd for C<sub>33</sub>H<sub>27</sub>N<sub>4</sub>O<sub>6</sub><sup>+</sup> ([M + H]<sup>+</sup>), 575.1925, found, 575.1935.

**2-(5-Fluorobenzo[*d*]oxazol-2-yl)-6-(2-(5-fluorobenzo[*d*]oxazol-2-yl)-4-methoxyphenoxy)-4-methoxy-3-(1*H*-pyrazol-1-yl)phenol (3aa)**

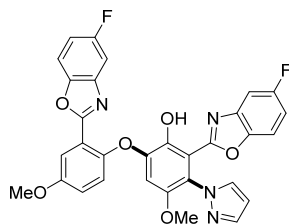

Light yellow solid (35 mg, 49 % yield, electrolysis time: 7.0 h,  $R_f = 0.23$  (petroleum ether/ethyl acetate = 3 : 1 (v/v))); M.P. 299.1-301.5 °C; NMR Spectroscopy:  $^1\text{H}$  NMR (300 MHz,  $\text{CDCl}_3$ , 25 °C,  $\delta$ ): 11.95 (s, 1H), 7.79 (s, 1H), 7.74 (d,  $J = 1.5$  Hz, 1H), 7.63 (d,  $J = 2.1$  Hz, 1H), 7.49 - 7.44 (m, 2H), 7.37 - 7.34 (m, 1H), 7.19 - 7.14 (m, 1H), 7.09 - 7.00 (m, 4H), 6.92 (s, 1H), 6.52 (t,  $J = 2.1$  Hz, 1H), 3.92 (s, 3H), 3.64 (s, 3H).  $^{13}\text{C}$  NMR (75 MHz,  $\text{CDCl}_3$ , 25 °C,  $\delta$ ): 162.7, 162.5, 161.9 (d,  $J = 18.4$  Hz, 1C), 158.7 (d,  $J = 16.5$  Hz, 1C), 155.9, 149.1, 148.9, 147.2, 147.0, 145.6, 145.2, 142.5 (d,  $J = 13.3$  Hz, 1C), 140.6, 139.3 (d,  $J = 13.4$  Hz, 1C), 132.9, 122.6, 121.1, 119.9, 118.9, 114.6, 113.9 - 112.9 (m, 2C), 111.4 - 111.2 (m, 1C), 110.7, 108.6, 106.8 - 105.6 (m, 2C), 106.4, 57.3, 56.1.  $^{19}\text{F}$  NMR (282 MHz,  $\text{CDCl}_3$ , 25 °C,  $\delta$ ): -116.3, -117.7. Mass Spectrometry: HRMS (ESI-TOF) ( $m/z$ ): calcd for  $\text{C}_{31}\text{H}_{21}\text{F}_2\text{N}_4\text{O}_6^+$  ( $[\text{M} + \text{H}]^+$ ), 583.1424, found, 583.1434.

**2-(5-Chlorobenzo[d]oxazol-2-yl)-6-(2-(5-chlorobenzo[d]oxazol-2-yl)-4-methoxyphenoxy)-4-methoxy-3-(1H-pyrazol-1-yl)phenol (3ab)**

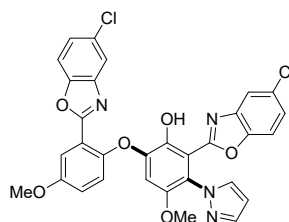

Light yellow solid (42 mg, 54 % yield, electrolysis time: 8.0 h,  $R_f = 0.12$  (petroleum ether/ethyl acetate = 3 : 1 (v/v))); M.P. 292.5-294.0 °C; NMR Spectroscopy:  $^1\text{H}$  NMR (300 MHz,  $\text{CDCl}_3$ , 25 °C,  $\delta$ ): 11.89 (s, 1H), 7.80 (t,  $J = 1.5$  Hz, 1H), 7.76 (d,  $J = 2.1$  Hz, 1H), 7.74 (d,  $J = 1.5$  Hz, 1H), 7.67 (d,  $J = 2.1$  Hz, 1H), 7.62 (d,  $J = 2.1$  Hz, 1H), 7.47 (d,  $J = 8.7$  Hz, 1H), 7.32 - 7.27 (m, 2H), 7.16 (d,  $J = 8.7$  Hz, 1H), 7.09 (d,  $J = 1.8$  Hz, 2H), 6.92 (s, 1H), 6.52 (t,  $J = 2.1$  Hz, 1H), 3.93 (s, 3H), 3.65 (s, 3H).  $^{13}\text{C}$  NMR (75 MHz,  $\text{CDCl}_3$ , 25 °C,  $\delta$ ): 162.2, 162.1, 156.0, 149.4, 149.1, 148.9, 147.9, 146.9, 145.2, 142.9, 140.6, 139.7, 132.9, 130.8, 130.1, 126.3, 125.7, 121.1, 120.2, 119.9, 119.3, 118.7, 114.7, 111.7, 110.7, 108.7, 106.4, 57.3, 56.1. Mass Spectrometry: HRMS (ESI-TOF) ( $m/z$ ): calcd for  $\text{C}_{31}\text{H}_{21}\text{Cl}_2\text{N}_4\text{O}_6^+$  ( $[\text{M} + \text{H}]^+$ ), 615.0833, found, 615.0831.

**2-(Benzo[d]thiazol-2-yl)-6-(2-(benzo[d]thiazol-2-yl)-4-(prop-2-yn-1-yloxy)phenoxy)-4-(prop-2-yn-1-yloxy)-3-(1H-pyrazol-1-yl)phenol (3ac)**

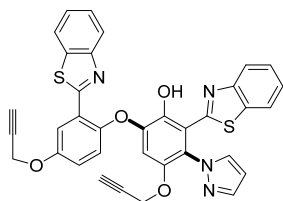

Light yellow solid (27 mg, 35 % yield, electrolysis time: 7.4 h,  $R_f = 0.23$  (petroleum ether/ethyl acetate = 3 : 1 (v/v))); M.P. 283.9-287.8 °C; NMR Spectroscopy:  $^1\text{H}$  NMR (300 MHz,  $\text{CDCl}_3$ , 25 °C,  $\delta$ ): 14.17 (s, 1H), 7.25 (d,  $J = 2.4$  Hz, 1H), 8.12 (d,  $J = 8.1$  Hz, 1H), 7.96 (d,  $J = 8.1$  Hz, 1H), 7.92 - 7.88 (m, 2H), 7.76 (d,  $J = 7.8$  Hz, 1H), 7.64 (d,  $J = 2.4$  Hz, 1H), 7.52 - 7.45 (m, 2H), 7.41 - 7.34 (m, 2H), 7.10 - 7.05 (m, 3H), 6.64 (t,  $J = 2.1$  Hz, 1H), 4.84 (d,  $J = 2.4$  Hz, 2H), 4.40 (d,  $J = 2.4$  Hz, 2H), 2.57 (t,  $J = 2.4$  Hz, 1H), 2.37 (t,  $J = 2.4$  Hz, 1H).  $^{13}\text{C}$  NMR (75 MHz,  $\text{CDCl}_3$ , 25 °C,  $\delta$ ): 164.8, 162.2, 154.1, 152.3, 149.2, 149.1, 146.9, 146.6, 146.0, 142.2, 136.5, 134.1, 133.8, 126.9, 126.2, 126.1, 125.5, 125.2, 124.6, 123.2, 122.2, 121.6, 121.3, 120.1, 119.9, 116.6, 114.4, 110.8, 108.2, 78.5, 77.9, 77.4, 75.9, 58.6, 56.8. Mass Spectrometry: HRMS (ESI-TOF) ( $m/z$ ): calcd for  $\text{C}_{35}\text{H}_{23}\text{N}_4\text{O}_4\text{S}_2^+$  ( $[\text{M} + \text{H}]^+$ ), 627.1155, found, 627.1154.

**3-(1H-Benzo[d]imidazol-1-yl)-2-(benzo[d]thiazol-2-yl)-6-(2-(benzo[d]thiazol-2-yl)-4-((*tert*-butyldimethylsilyl)oxy)phenoxy)-4-((*tert*-butyldimethylsilyl)oxy)phenol (3ad)**

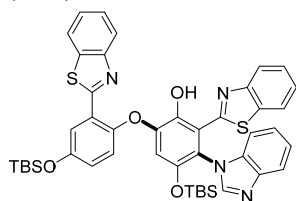

Yellow solid (42 mg, 41 % yield, electrolysis time: 7.7 h,  $R_f = 0.17$  (petroleum ether/ethyl acetate = 3 : 1 (v/v))); M.P. 287.4-289.5 °C; NMR Spectroscopy:  $^1\text{H}$  NMR (300 MHz,  $\text{CDCl}_3$ , 25 °C,  $\delta$ ): 14.18 (s, 1H), 8.14 - 8.12 (m, 2H), 7.98 - 7.89 (m, 4H), 7.59 (d,  $J = 7.8$  Hz, 1H), 7.52 - 7.43 (m, 2H), 7.39 - 7.28 (m, 3H), 7.22 (d,  $J = 7.2$  Hz, 1H), 7.11 - 7.07 (m, 2H), 7.02 - 6.98 (m, 1H), 6.70 (s, 1H), 1.05 (d,  $J = 3$  Hz, 9H), 0.43 (s, 9H), 0.29 (s, 6H), -0.13 (s, 3H), -0.3 (s, 3H).  $^{13}\text{C}$  NMR (75 MHz,  $\text{CDCl}_3$ , 25 °C,  $\delta$ ): 164.6, 162.1, 152.6, 152.5, 149.1, 148.2, 147.2, 145.7, 145.2, 144.1, 144.0, 136.5, 134.9, 133.4, 127.0, 126.3, 126.2, 126.1, 125.2, 124.1, 123.5, 123.3, 123.1, 122.1, 121.6, 121.5, 120.8, 120.7, 120.6, 118.5, 116.4, 112.2, 110.6, 25.9, 24.9, 18.4, 17.5, -4.2, -4.4, -4.8. Mass Spectrometry: HRMS (ESI-TOF) ( $m/z$ ): calcd for  $\text{C}_{45}\text{H}_{49}\text{N}_4\text{O}_4\text{S}_2\text{Si}_2^+$  ( $[\text{M} + \text{H}]^+$ ), 829.2728, found, 829.2739.

**3-(1H-benzo[d]imidazol-1-yl)-2-(benzo[d]thiazol-2-yl)-6-(2-(benzo[d]thiazol-2-yl)-4-(methylthio)phenoxy)-4-(methylthio)phenol (3ae)**

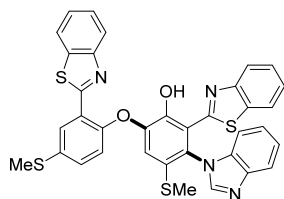

Yellow solid (39 mg, 47 % yield, electrolysis time: 7.2 h,  $R_f = 0.27$  (petroleum ether/ethyl acetate = 3 : 1 (v/v))); M.P. 279.3-283.0 °C; NMR Spectroscopy:  $^1\text{H}$  NMR (300 MHz,  $\text{CDCl}_3$ , 25 °C,  $\delta$ ): 14.59 (s, 1H), 8.15 (d,  $J = 8.1$  Hz, 1H), 8.00 (d,  $J = 8.0$  Hz, 2H), 7.91 (d,  $J = 8.1$  Hz, 2H), 7.59 (d,  $J = 7.9$  Hz, 1H), 7.54 - 7.45 (m, 2H), 7.43 - 7.38 (m, 2H), 7.37 - 7.35 (m, 1H), 7.32 - 7.28 (m, 1H), 2.61 (s, 3H), 2.19 (s, 3H).  $^{13}\text{C}$  NMR (75 MHz,  $\text{CDCl}_3$ , 25 °C,  $\delta$ ): 164.1, 162.0, 152.9, 152.4, 150.3, 148.7, 145.8, 143.9, 143.3, 136.4, 134.1, 133.2, 130.7, 130.4, 128.8, 128.2, 127.2, 126.4, 126.3, 125.2, 124.6, 123.5, 123.3, 122.1, 121.5, 121.4, 120.9, 117.9, 117.8, 110.3, 16.9, 16.6. Mass Spectrometry: HRMS (ESI-TOF) ( $m/z$ ): calcd for  $\text{C}_{35}\text{H}_{25}\text{N}_4\text{O}_2\text{S}_4^+$  ( $[\text{M} + \text{H}]^+$ ), 661.0855, found, 661.0855.

### 2-(4-Bromo-1H-pyrazol-1-yl)-4-methoxy-6-(1H-pyrazol-1-yl)phenol (3af)

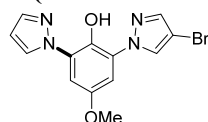

White solid (14 mg, 21 % yield, electrolysis time: 5.0 h,  $R_f = 0.27$  (petroleum ether/ethyl acetate = 3 : 1 (v/v))); M.P. 280.5-284.5 °C; NMR Spectroscopy:  $^1\text{H}$  NMR (300 MHz,  $\text{CDCl}_3$ , 25 °C,  $\delta$ ): 11.74 (s, 1H), 8.38 (d,  $J = 0.3$  Hz, 1H), 8.08 (d,  $J = 2.7$  Hz, 1H), 7.76 (d,  $J = 1.8$  Hz, 1H), 7.68 (s, 1H), 7.26 (d,  $J = 2.7$  Hz, 1H), 7.02 (d,  $J = 3$  Hz, 1H), 6.54 (t,  $J = 2.4$  Hz, 1H), 3.86 (s, 3H).  $^{13}\text{C}$  NMR (75 MHz,  $\text{CDCl}_3$ , 25 °C,  $\delta$ ): 152.3, 140.5, 139.5, 135.4, 131.3, 129.2, 128.3, 126.8, 107.2, 105.7, 104.5, 94.8, 56.1. Mass Spectrometry: HRMS (ESI-TOF) ( $m/z$ ): calcd for  $\text{C}_{13}\text{H}_{12}\text{BrN}_4\text{O}_2^+$  ( $[\text{M} + \text{H}]^+$ ), 335.0138, found, 335.0138.

### 2-(Benzo[d]thiazol-2-yl)-6-(2-(benzo[d]thiazol-2-yl)-4-methoxyphenoxy)-4-methoxyphenol (4)

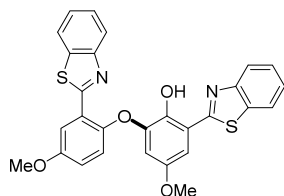

Yellow solid (29 mg, 45 % yield, electrolysis time: 2.5 h,  $R_f = 0.45$  (petroleum ether/ethyl acetate = 10 : 1 (v/v))); M.P. 277.8-279.9 °C; NMR Spectroscopy:  $^1\text{H}$  NMR (300 MHz,  $\text{CDCl}_3$ , 25 °C,  $\delta$ ): 12.50 (s, 1H), 8.16 - 8.15 (m, 1H), 8.12 (d,  $J = 8.1$  Hz, 1H), 7.95 (d,  $J = 8.1$  Hz, 1H), 7.92 - 7.86 (m, 2H), 7.53 - 7.48 (m, 2H), 7.46 - 7.42 (m, 1H), 7.39 - 7.32 (m, 1H), 7.04 - 6.97 (m, 3H), 6.72 (d,  $J = 2.7$  Hz, 1H), 3.95 (s, 3H), 3.78 (s, 3H).  $^{13}\text{C}$  NMR (75 MHz,  $\text{CDCl}_3$ , 25 °C,  $\delta$ ): 168.7, 162.7, 155.9, 152.3, 151.9, 148.9, 145.8, 144.5, 136.5, 132.9, 127.0, 126.1, 125.9, 125.2, 125.0, 123.1, 122.4,



121.7, 121.6, 119.9, 119.3, 117.8, 112.5, 110.3, 107.0, 56.1. Mass Spectrometry:  
HRMS (ESI-TOF) (m/z): calcd for  $C_{28}H_{21}N_2O_4S_2^+$  ( $[M + H]^+$ ), 513.0937,  
found, 513.0946.

## 12. NMR Spectrum

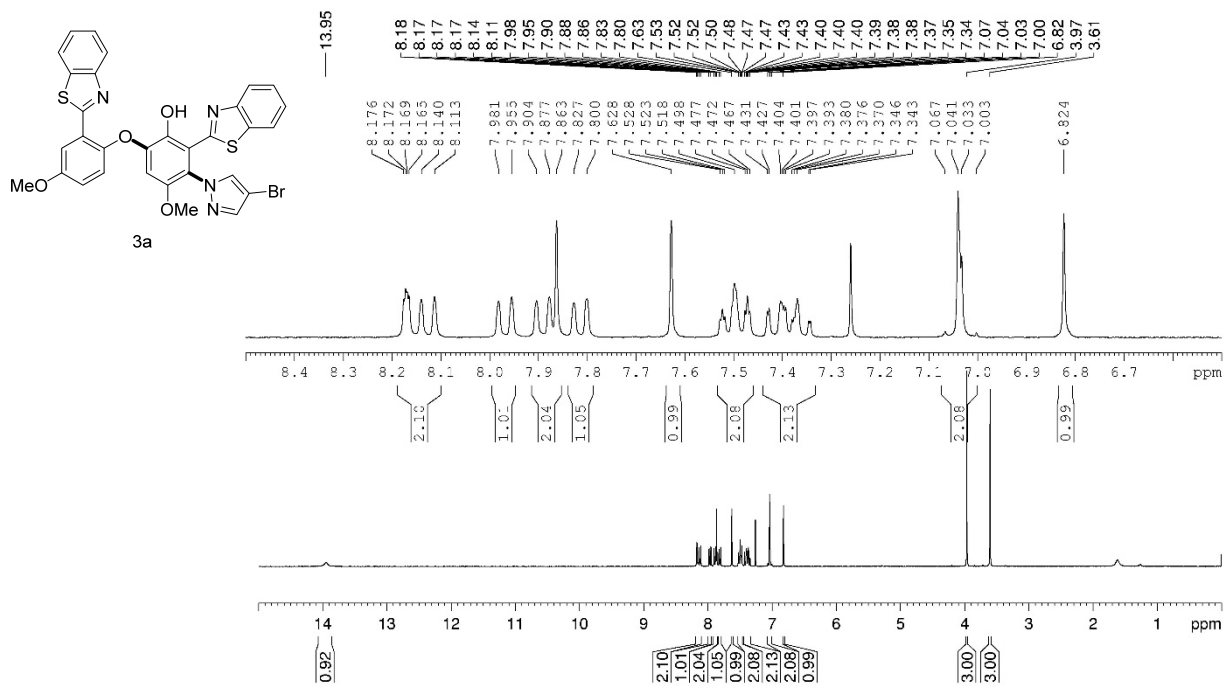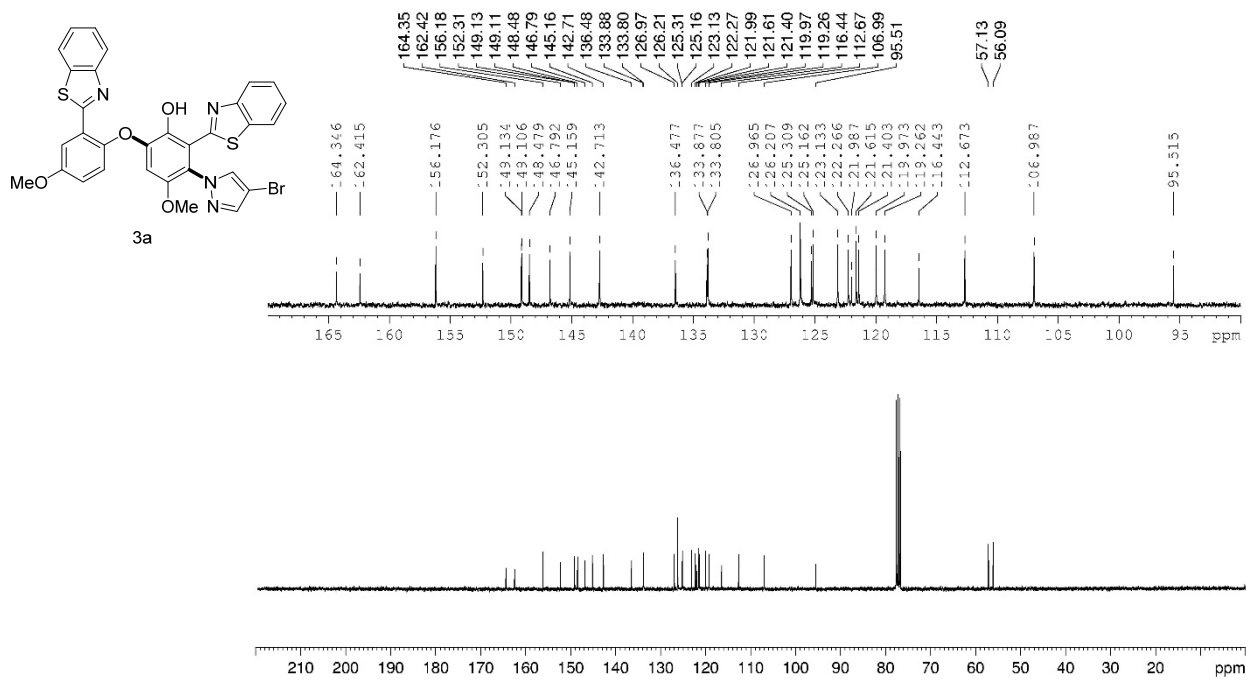

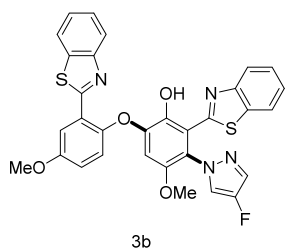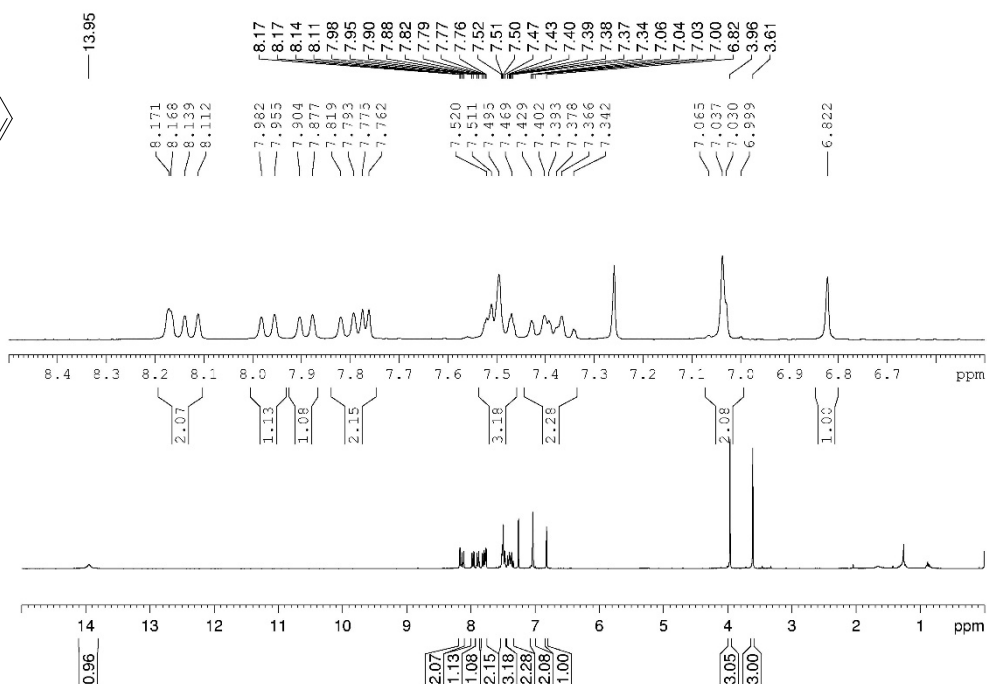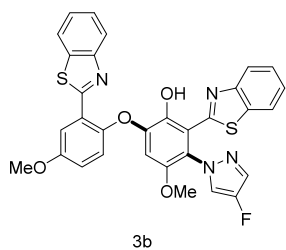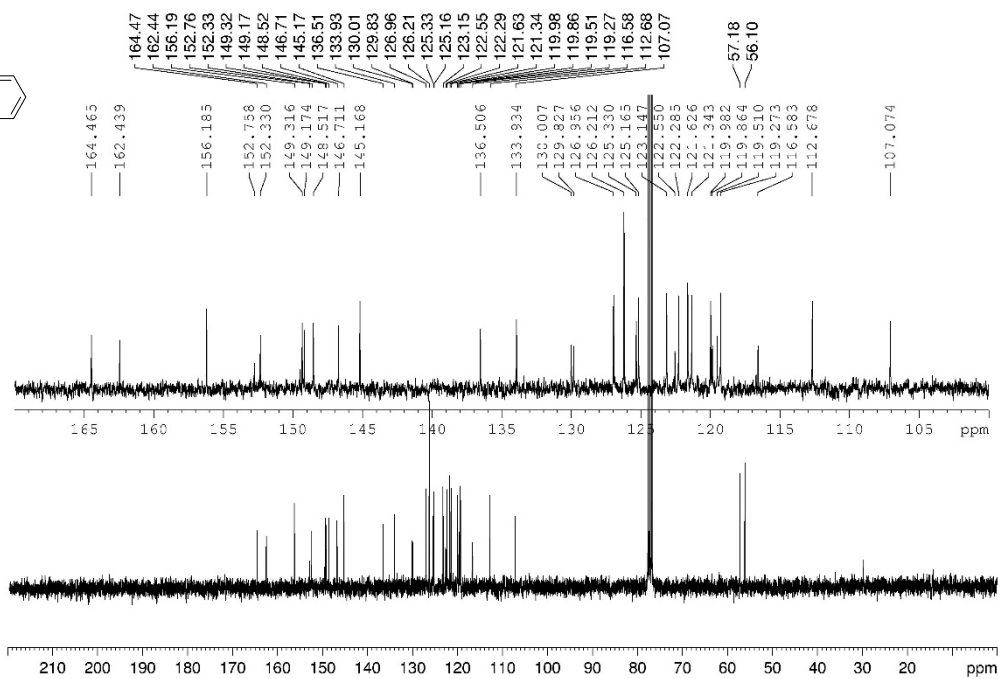

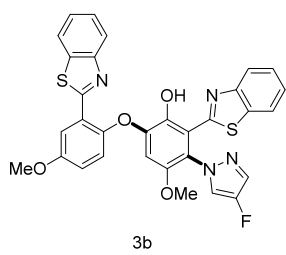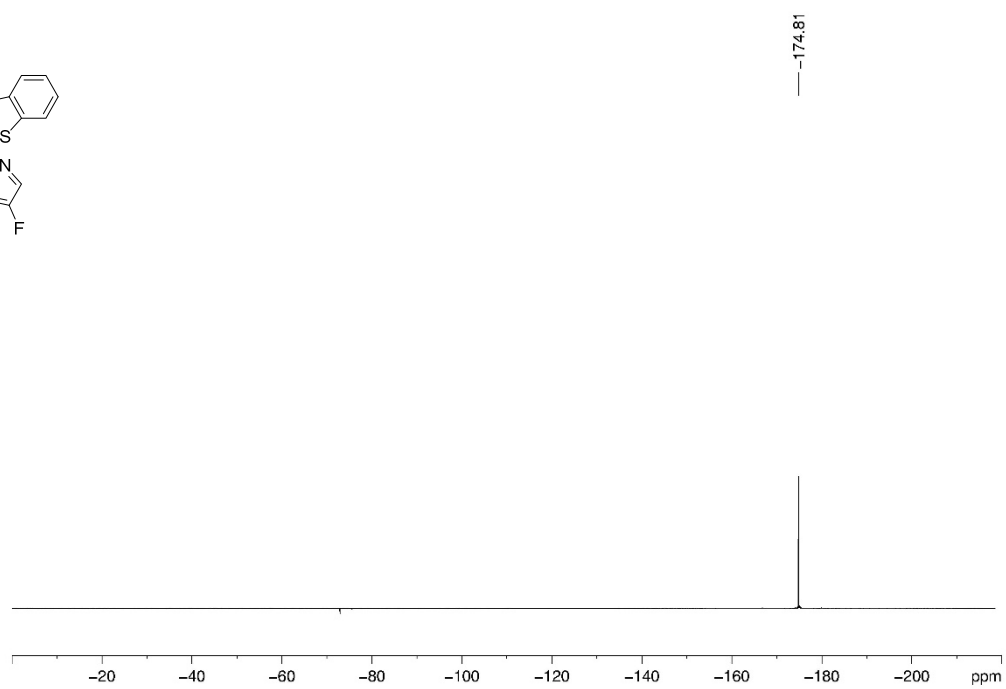

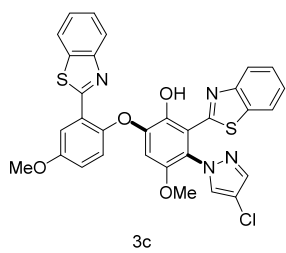

3c

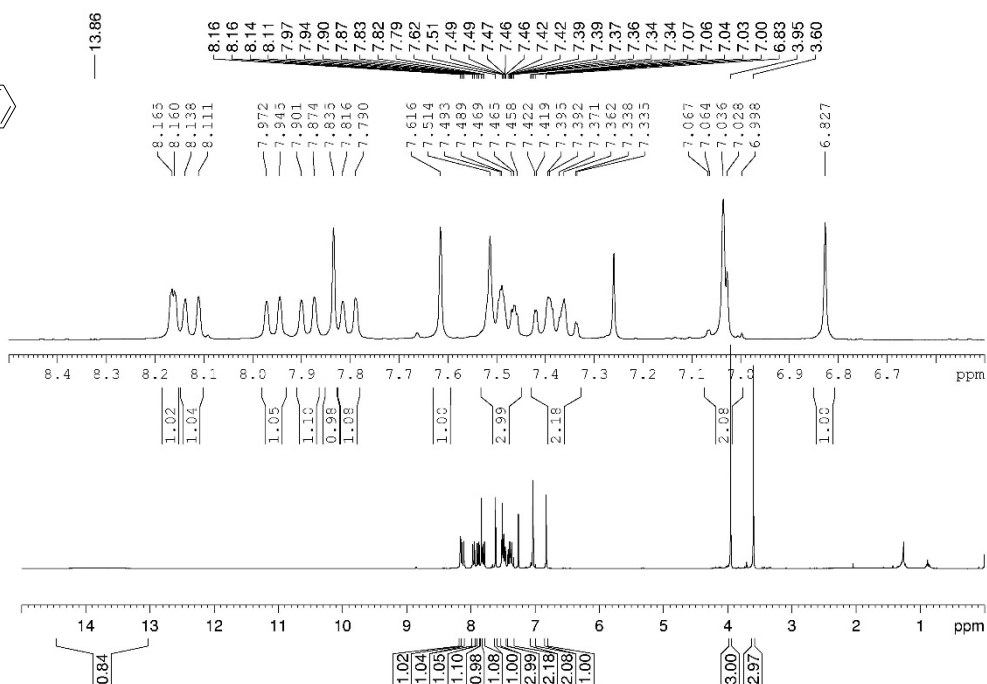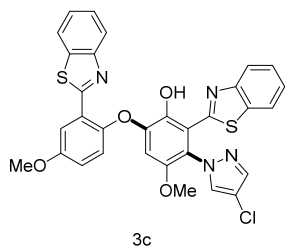

3c

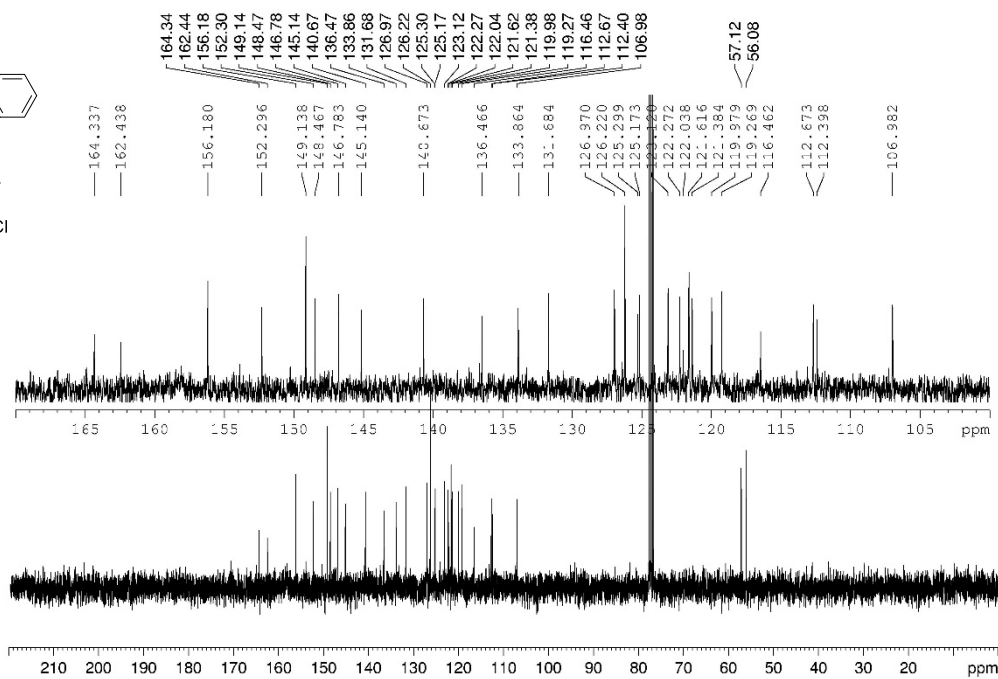



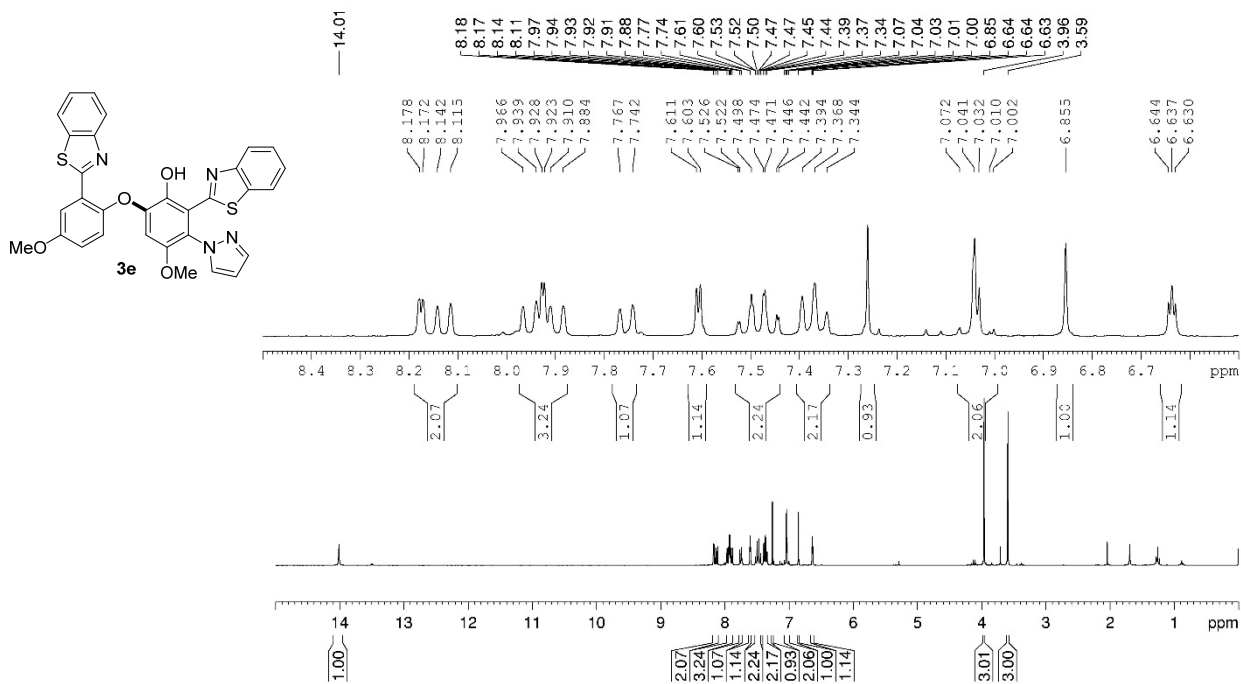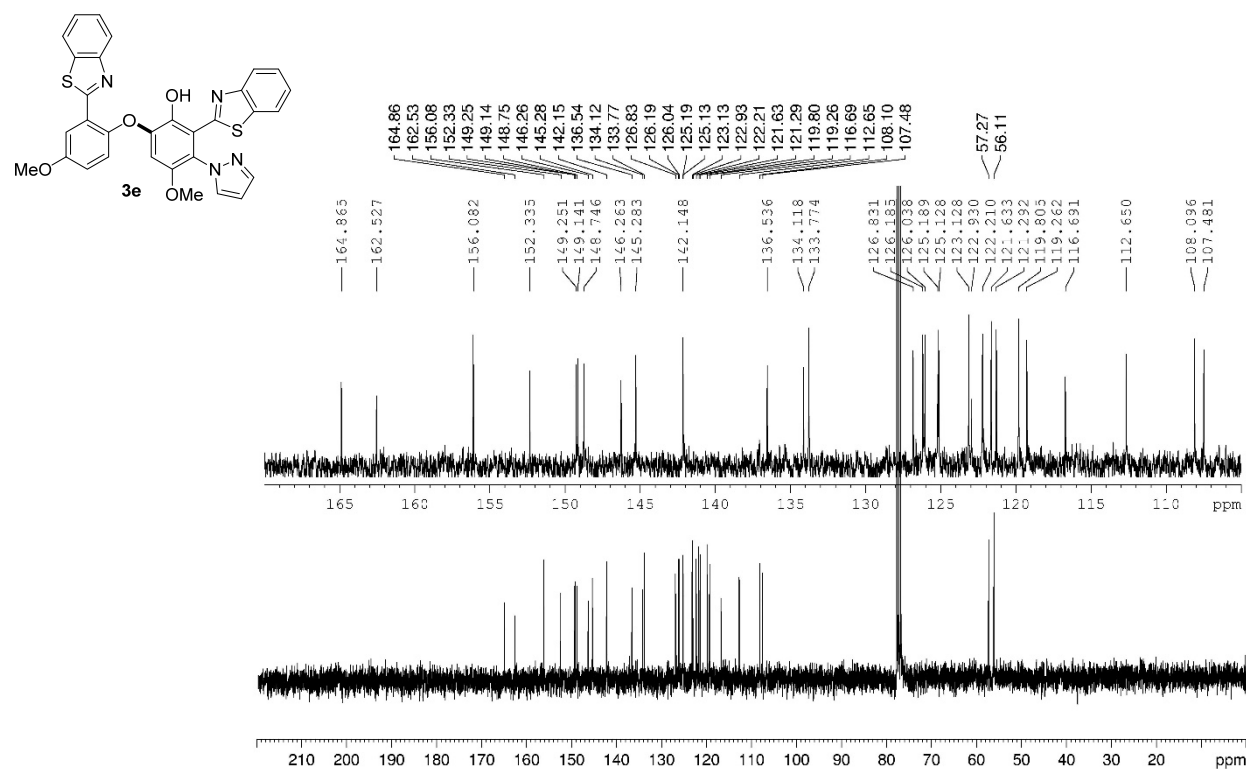

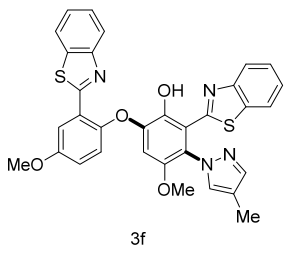

3f

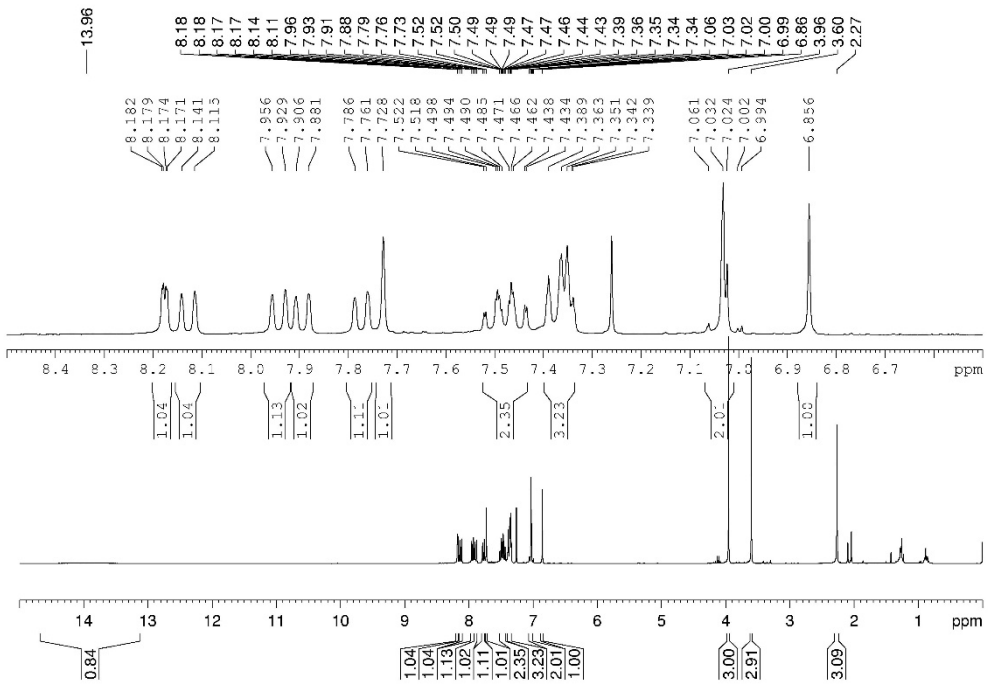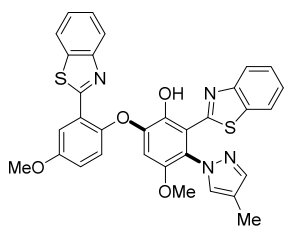

3f

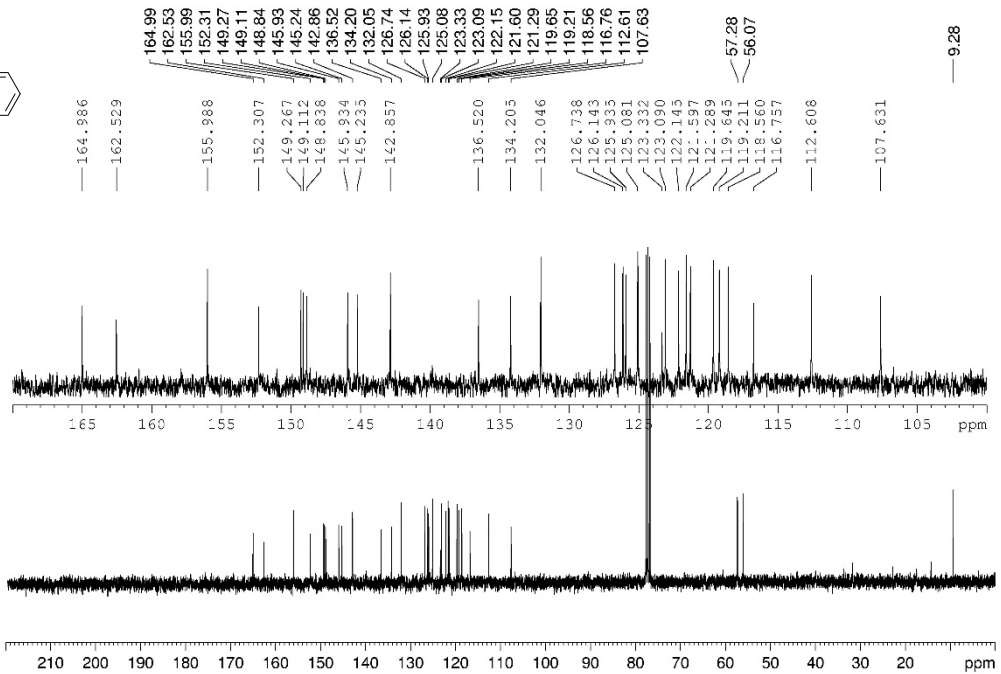



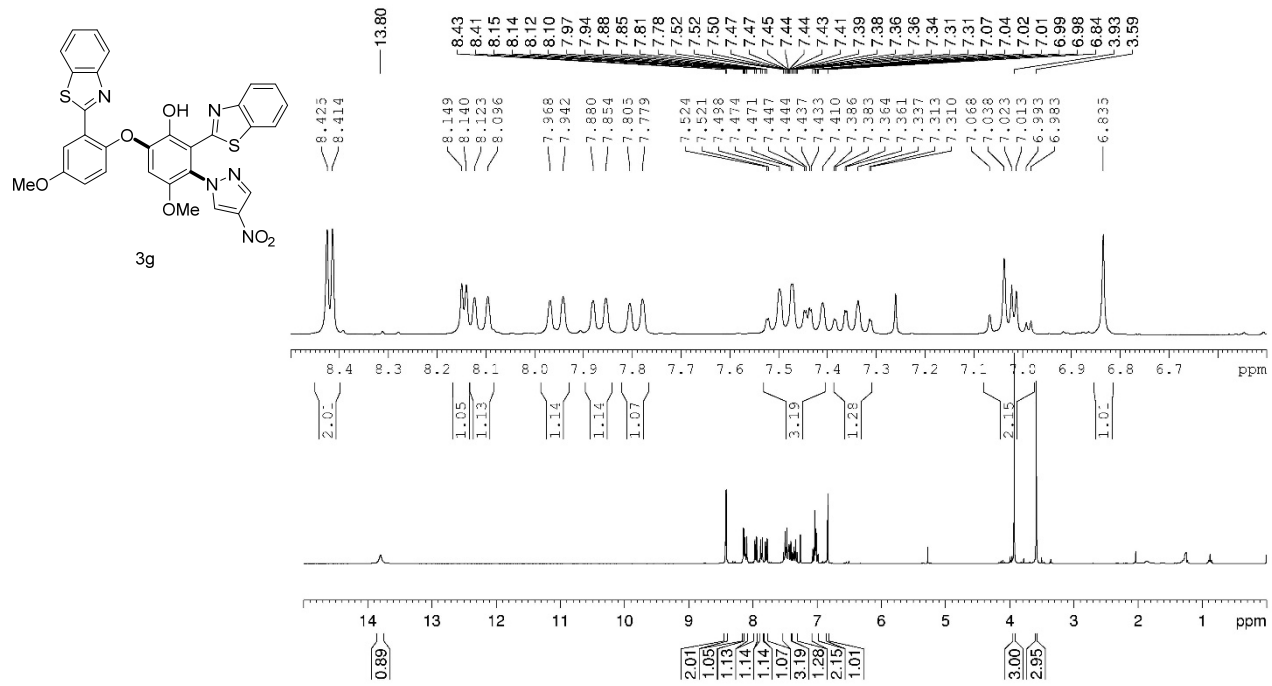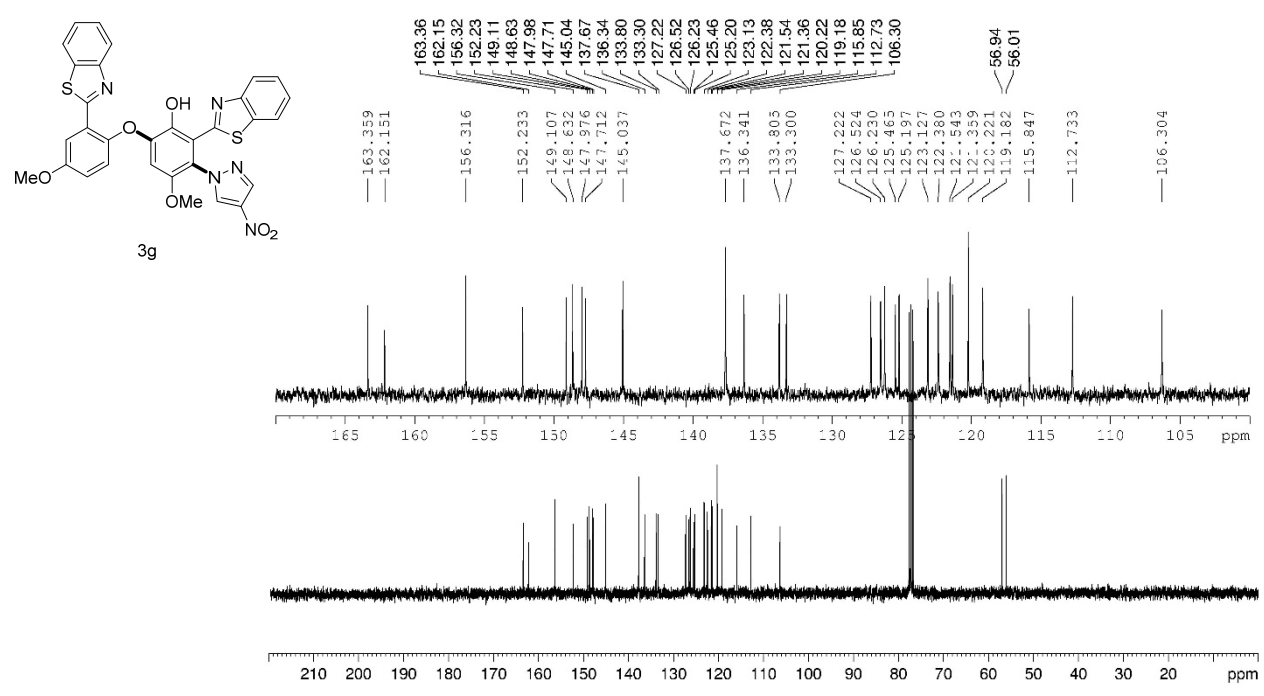

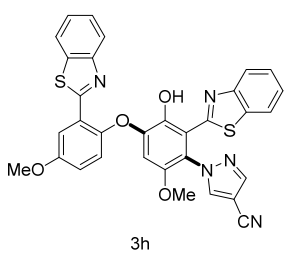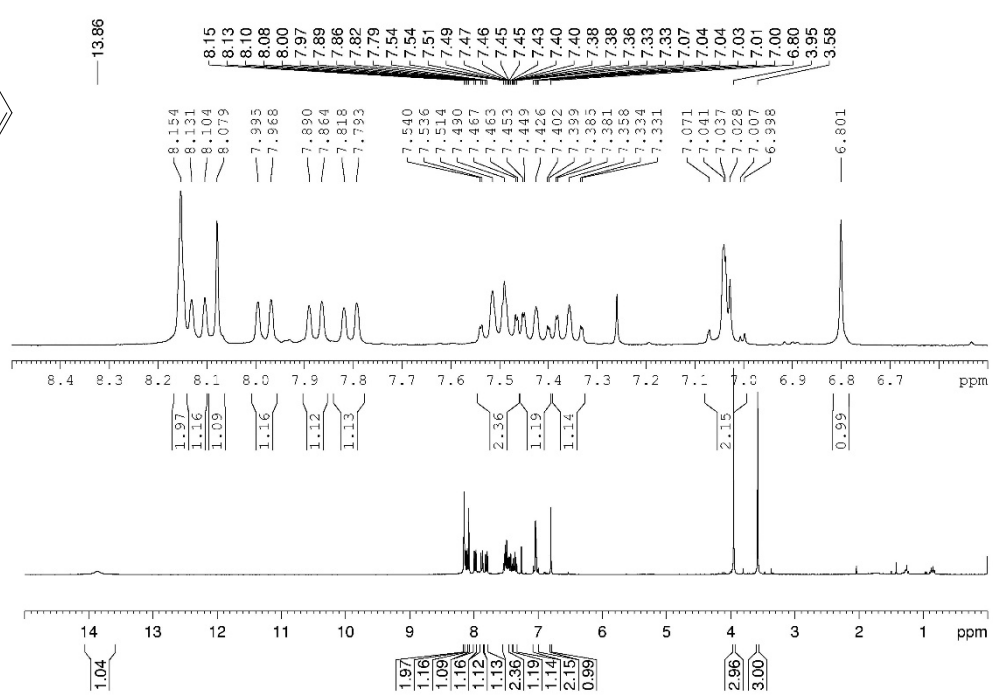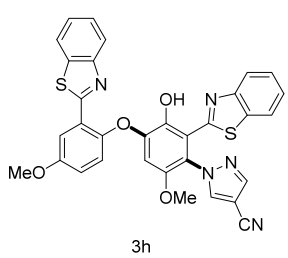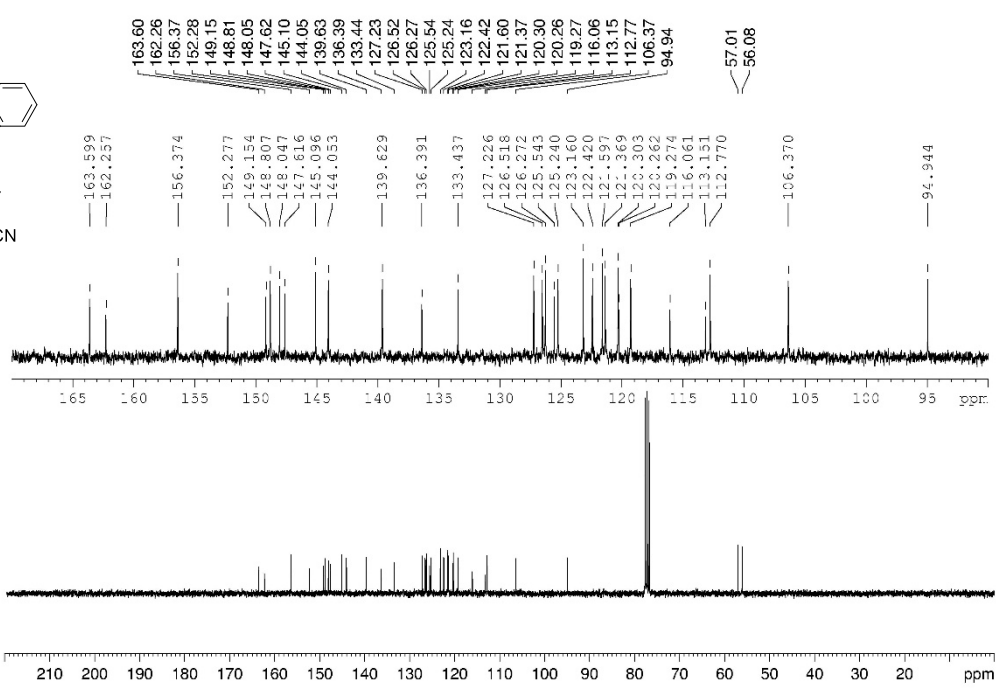

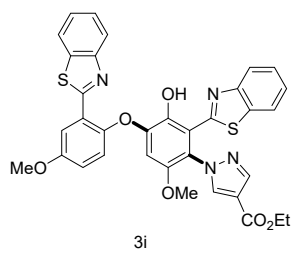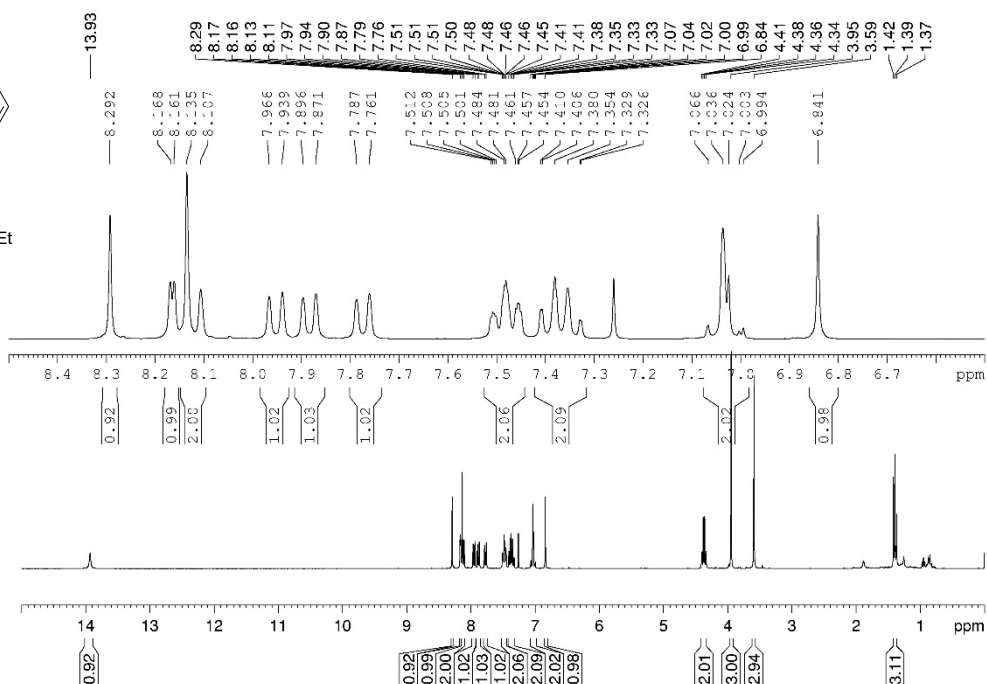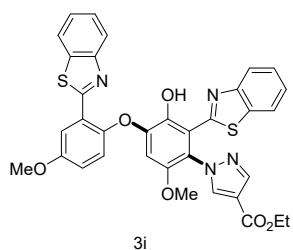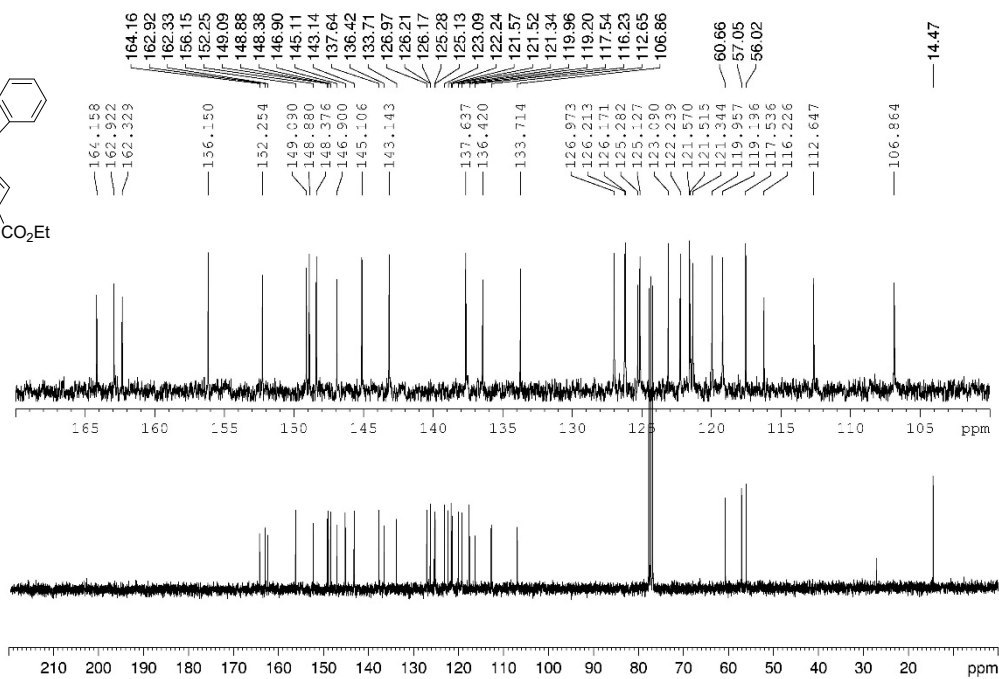

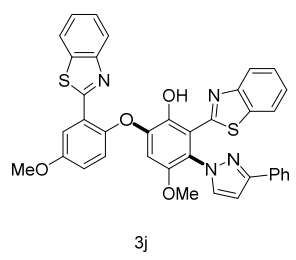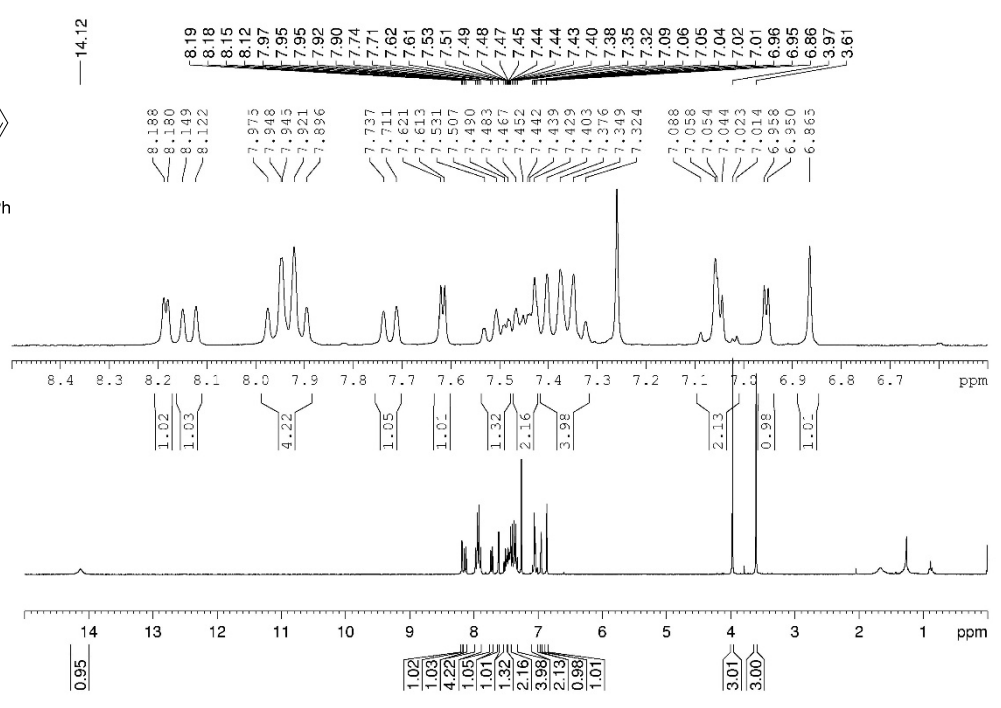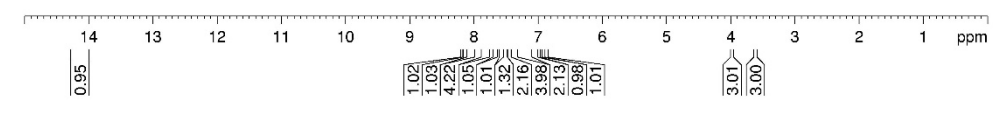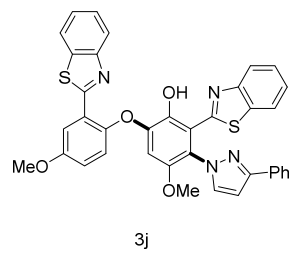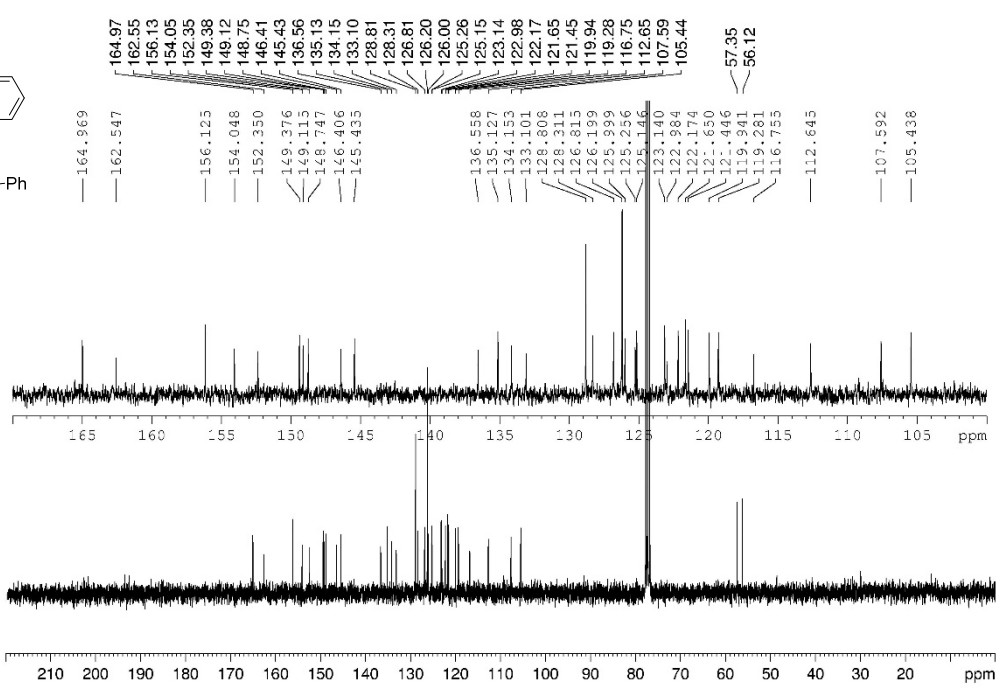

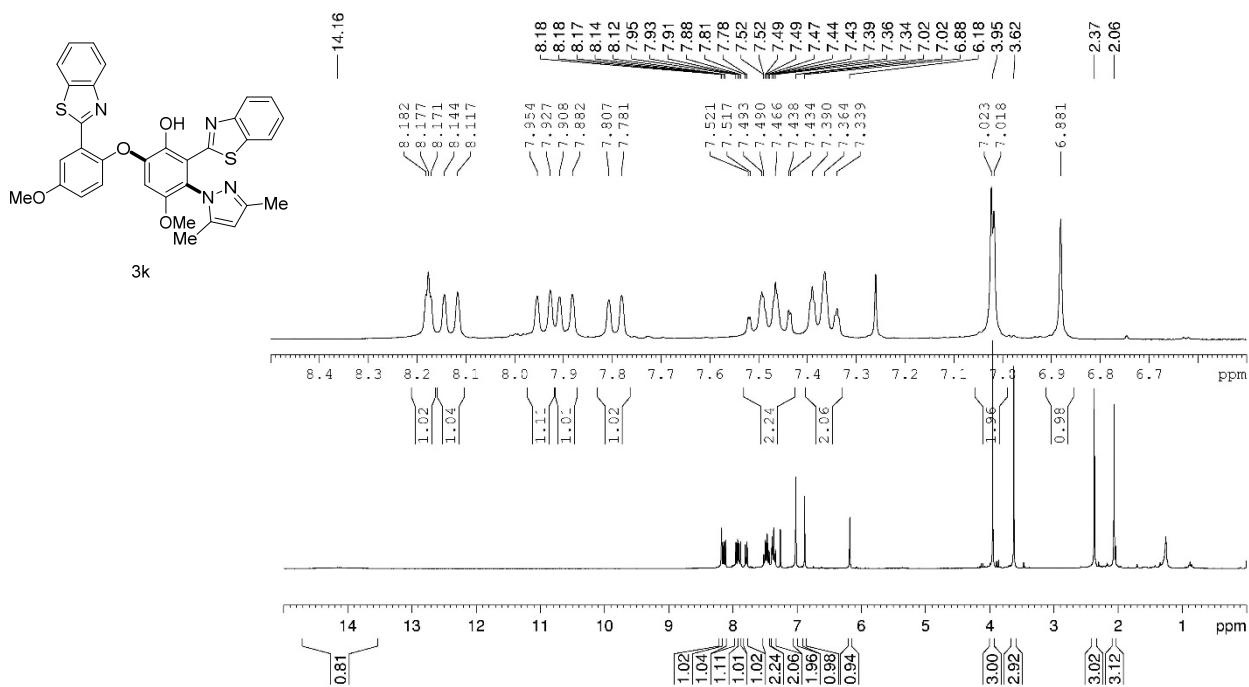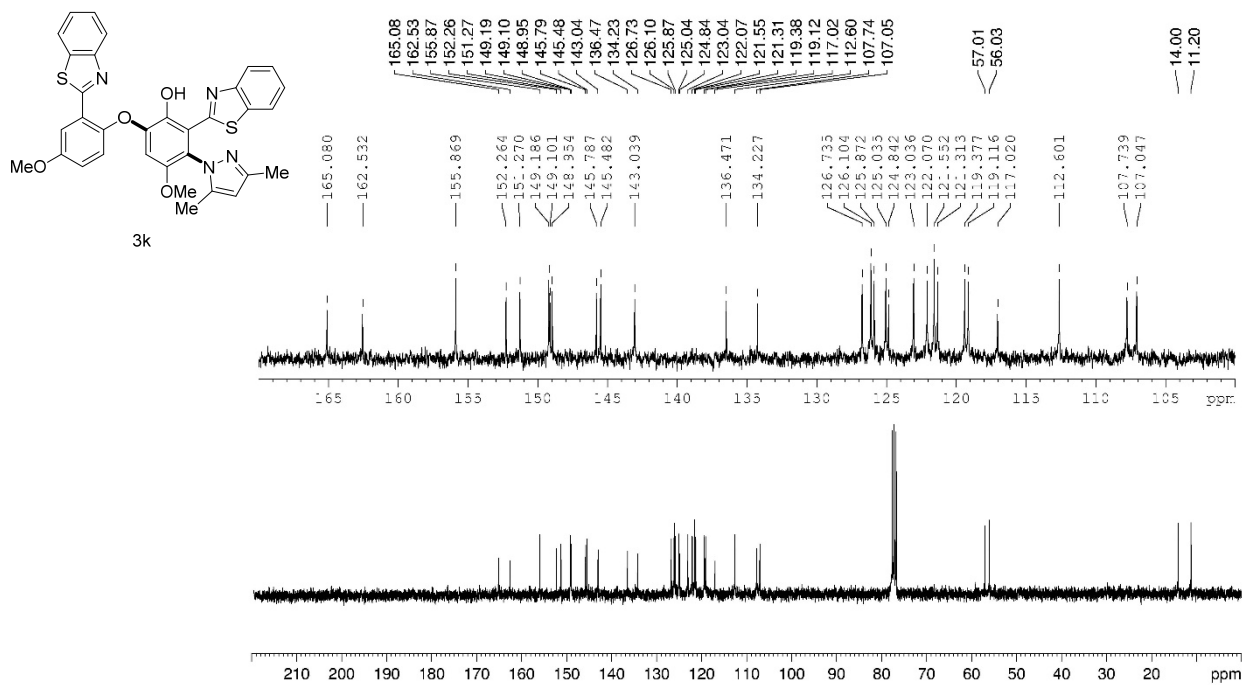

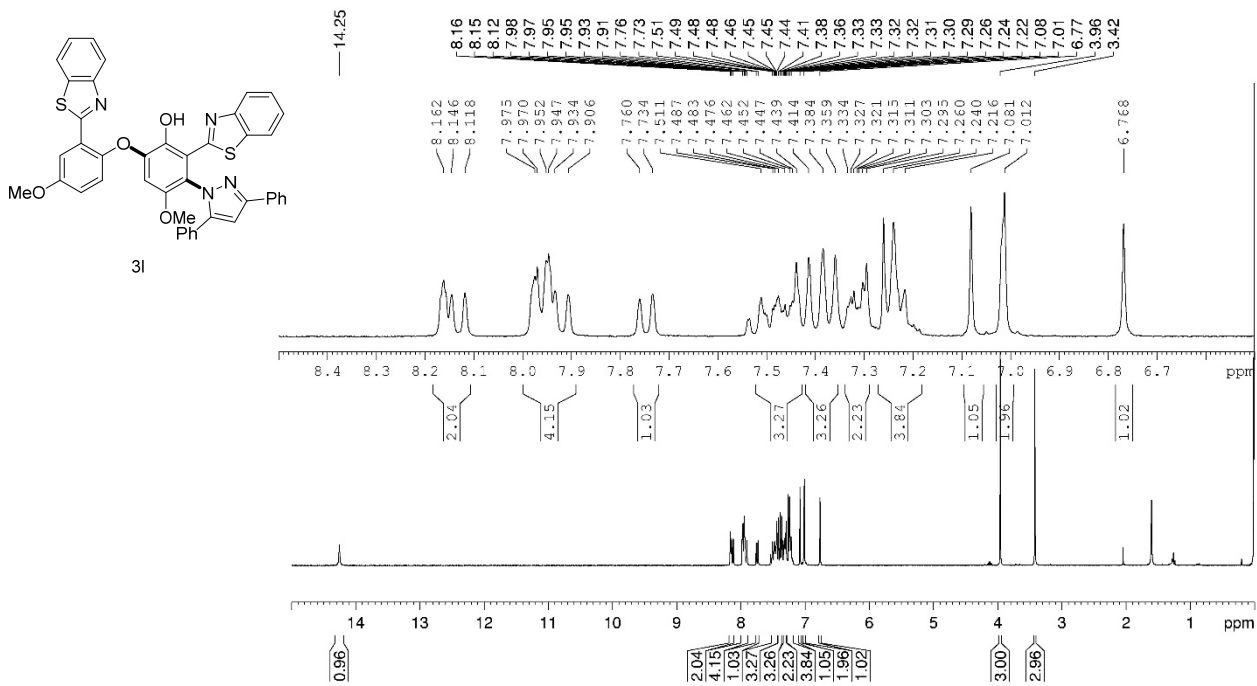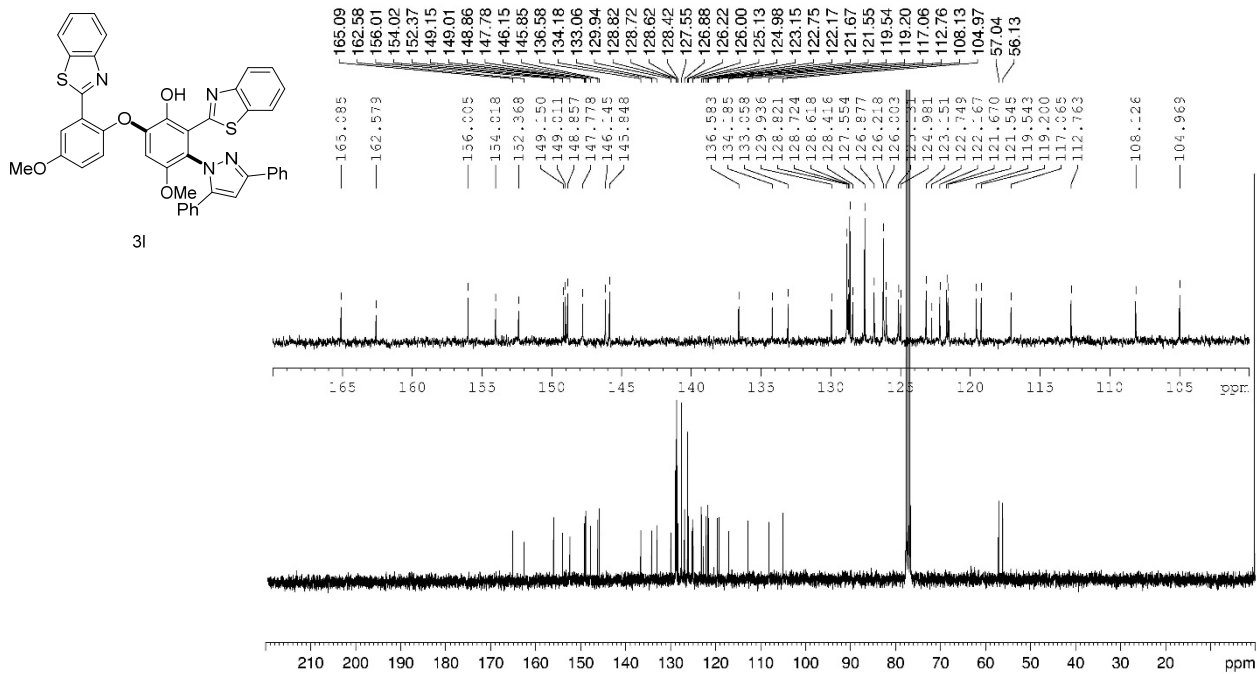

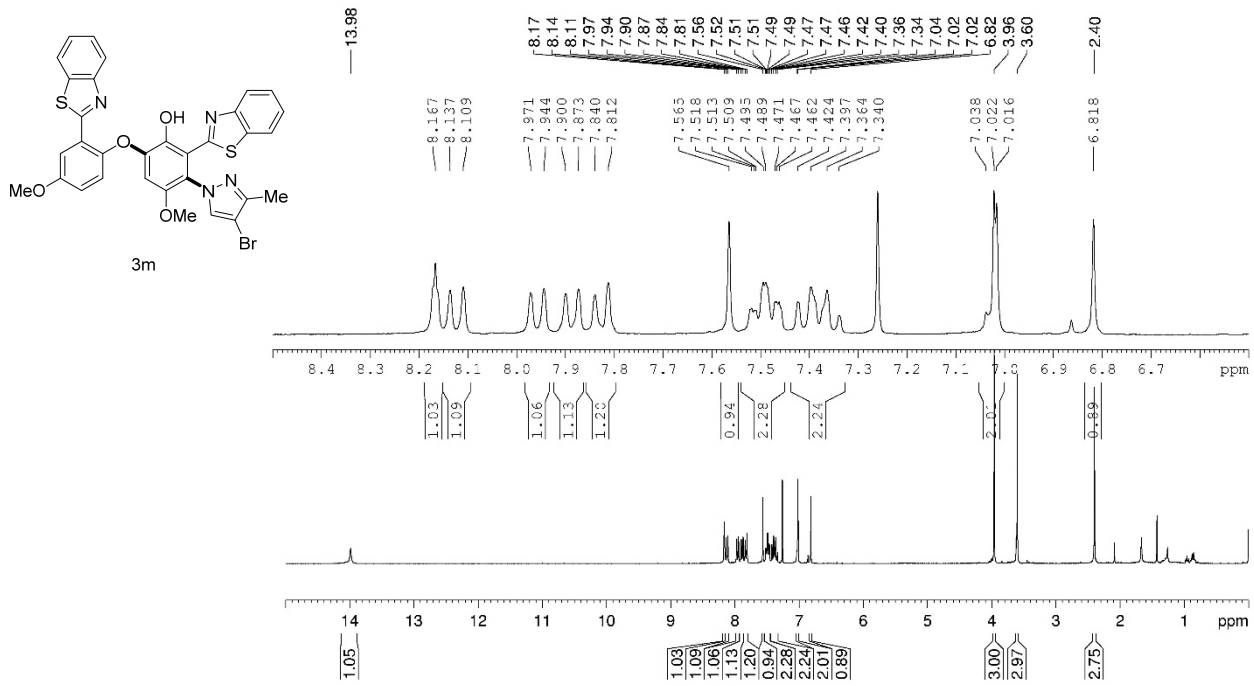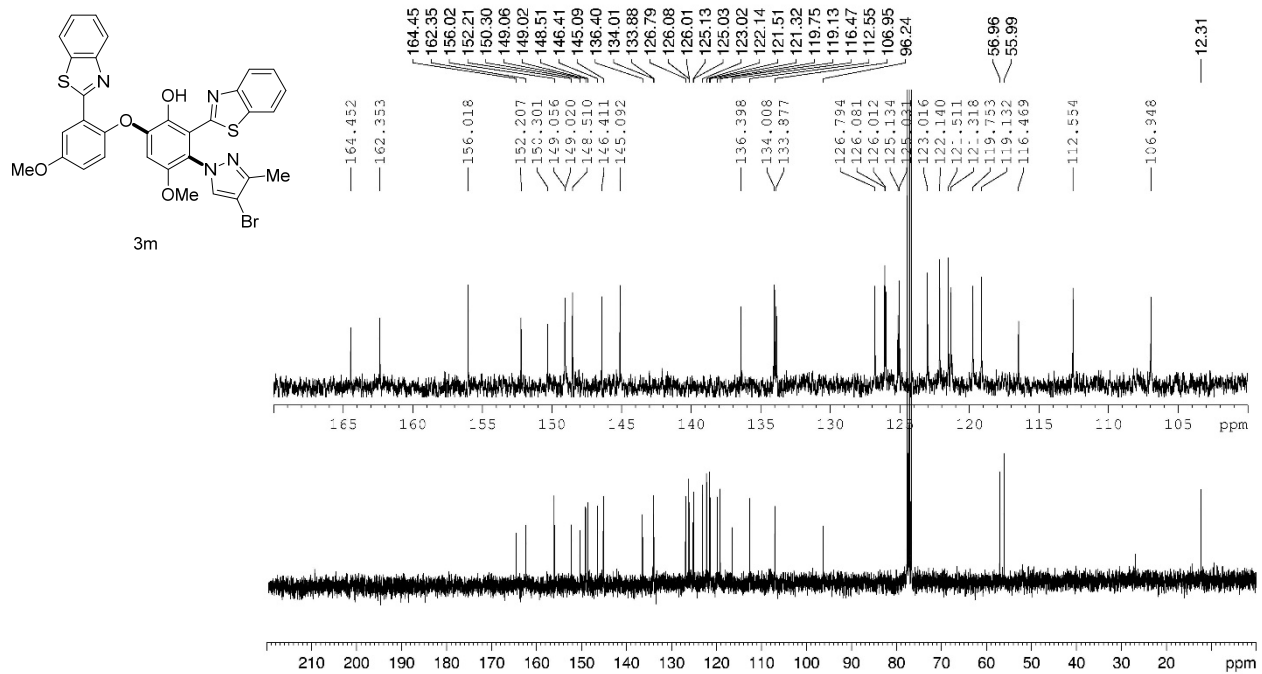





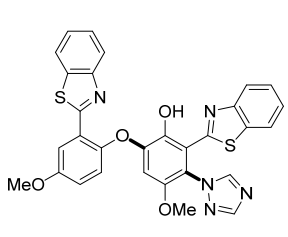

3o

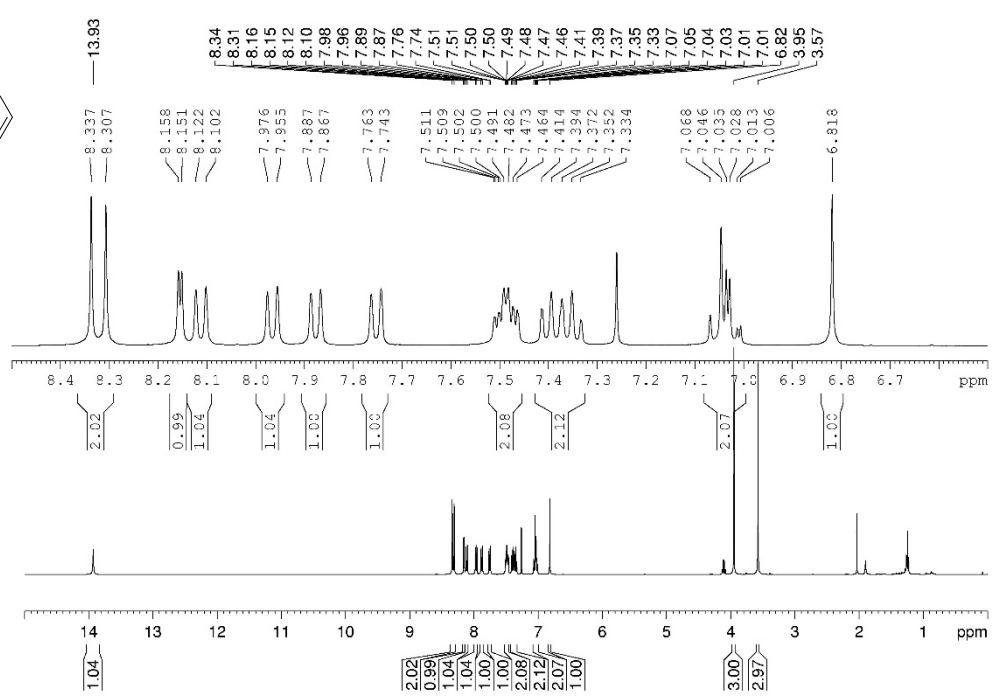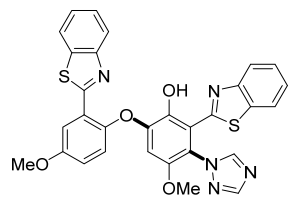

3o

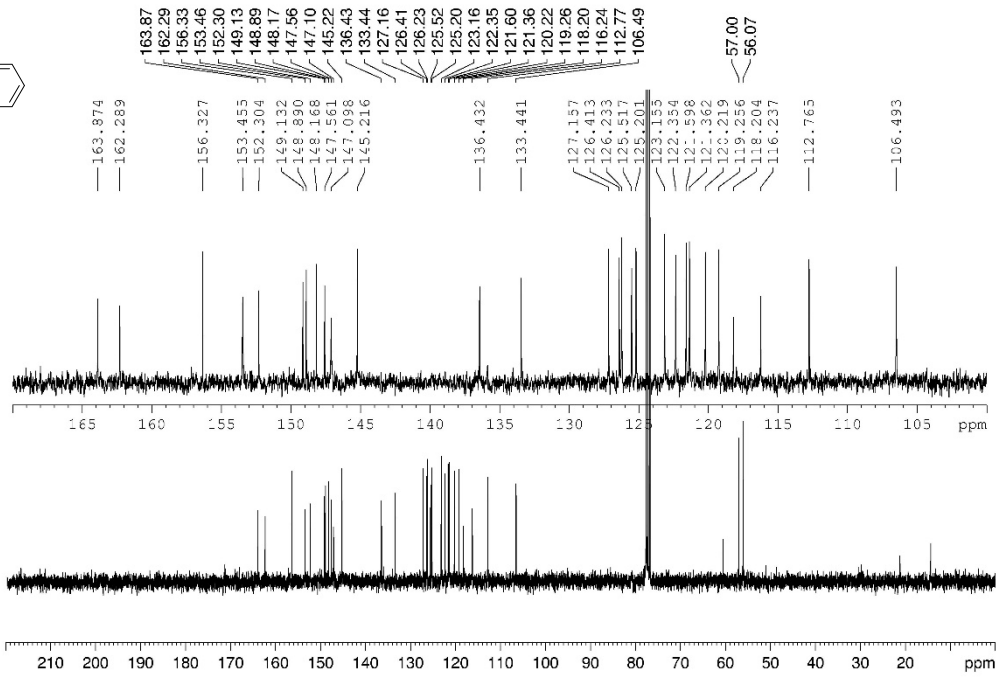



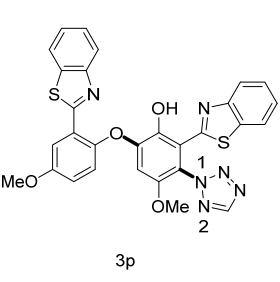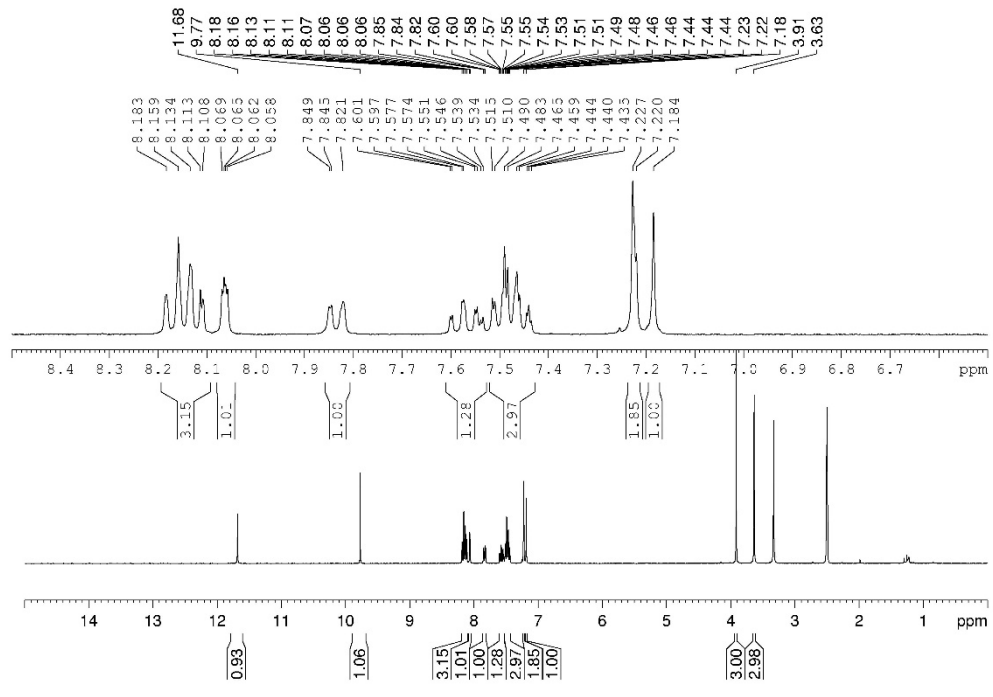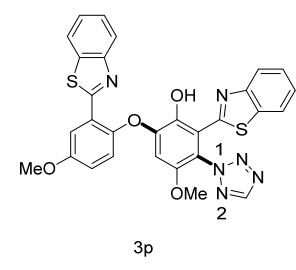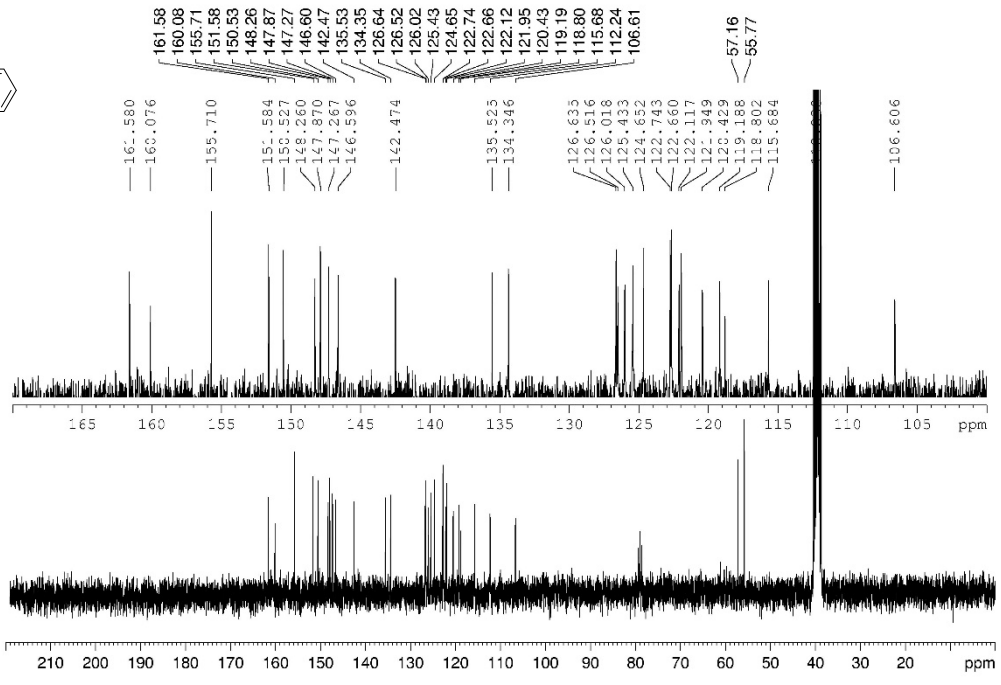

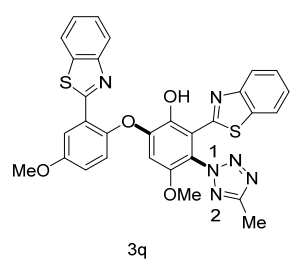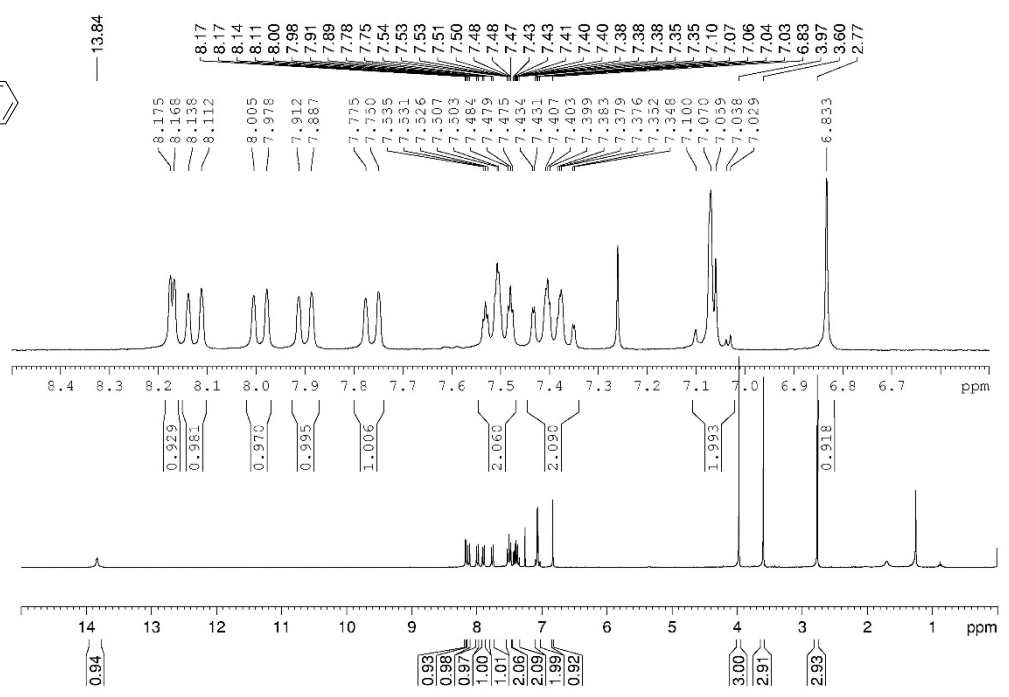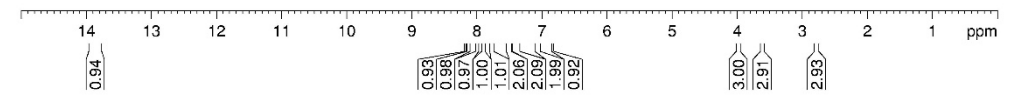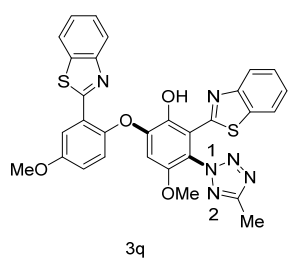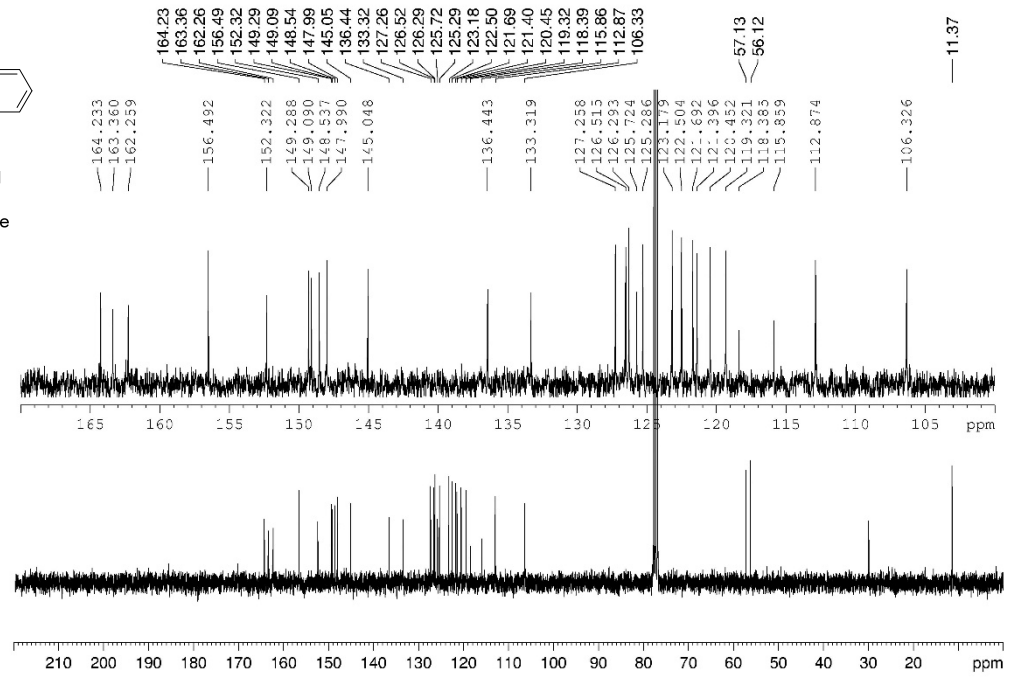

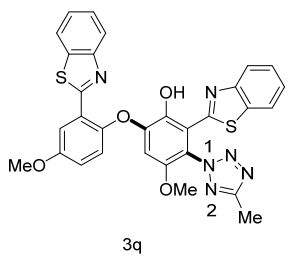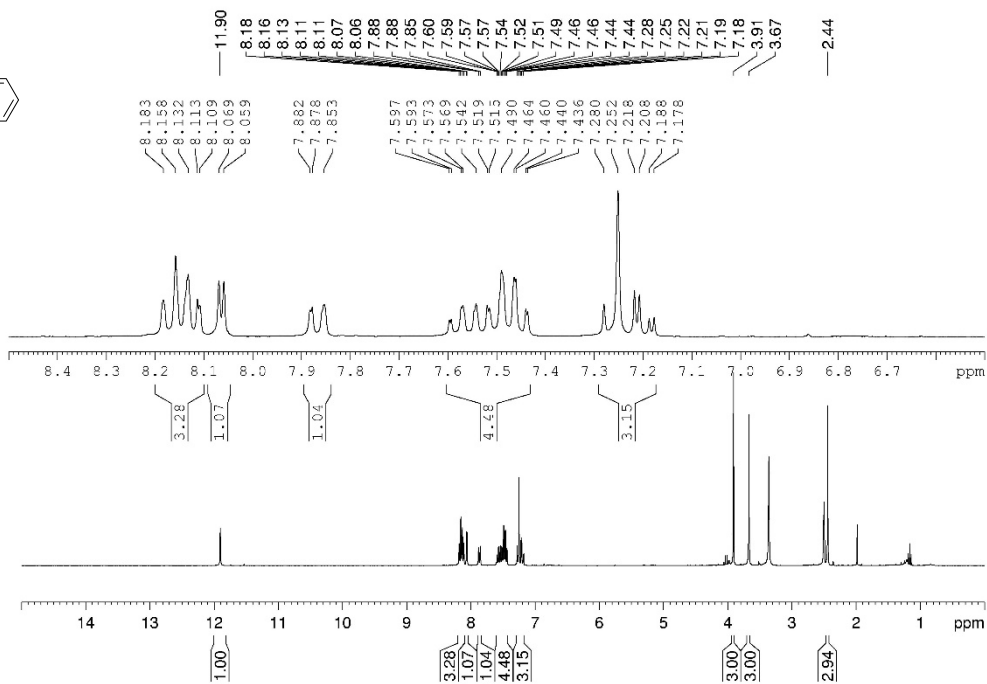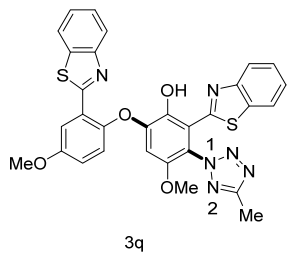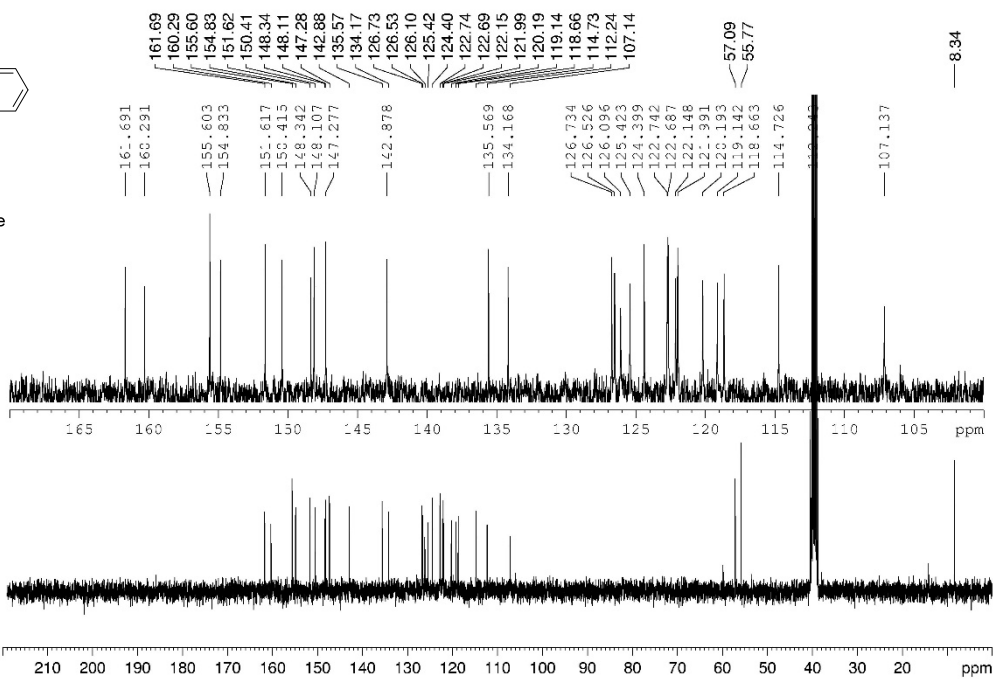



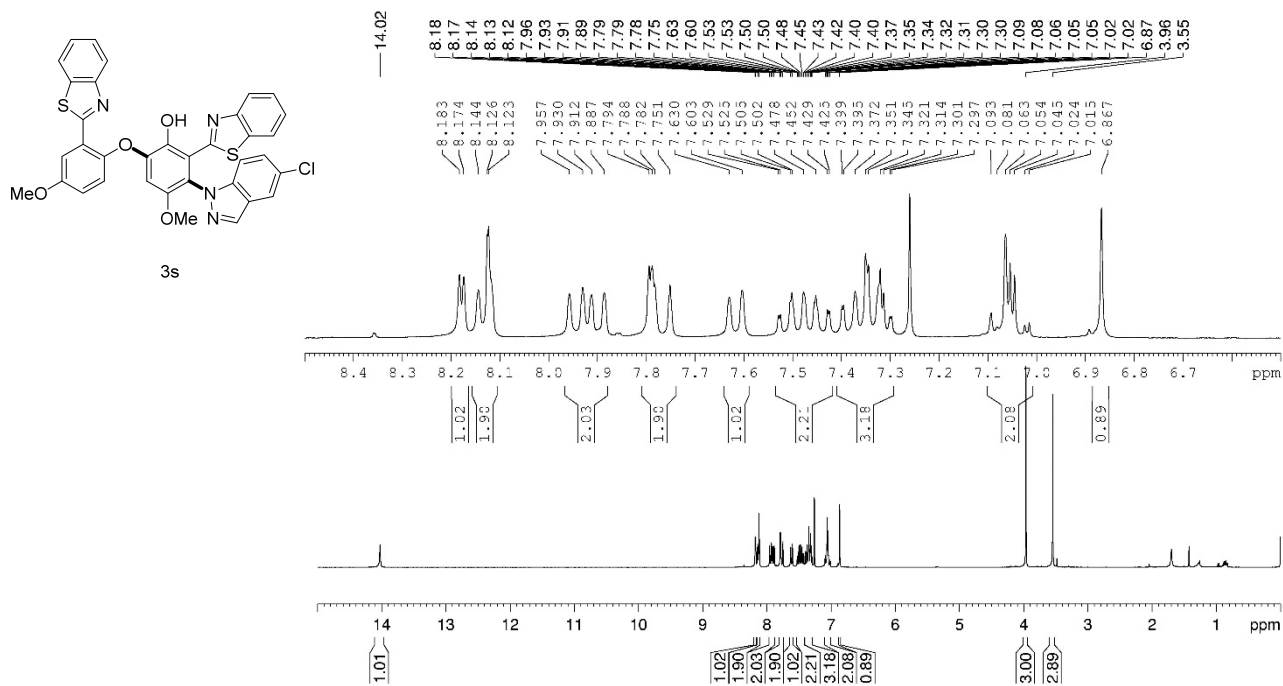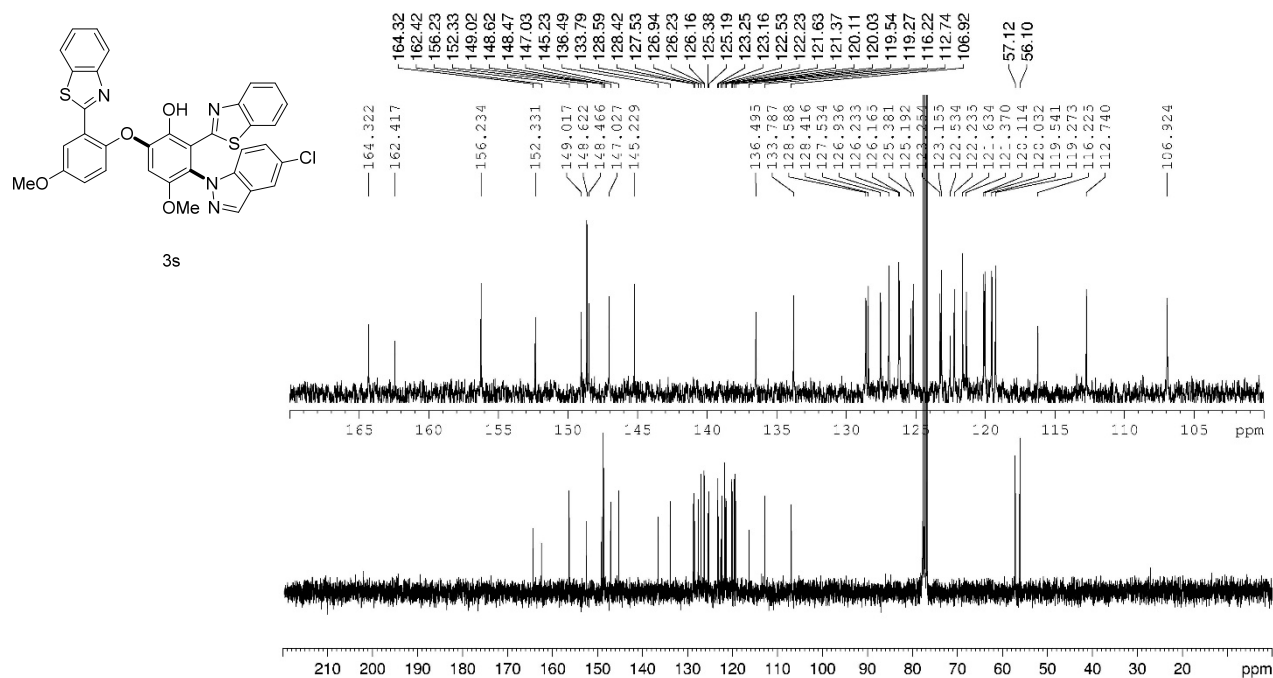

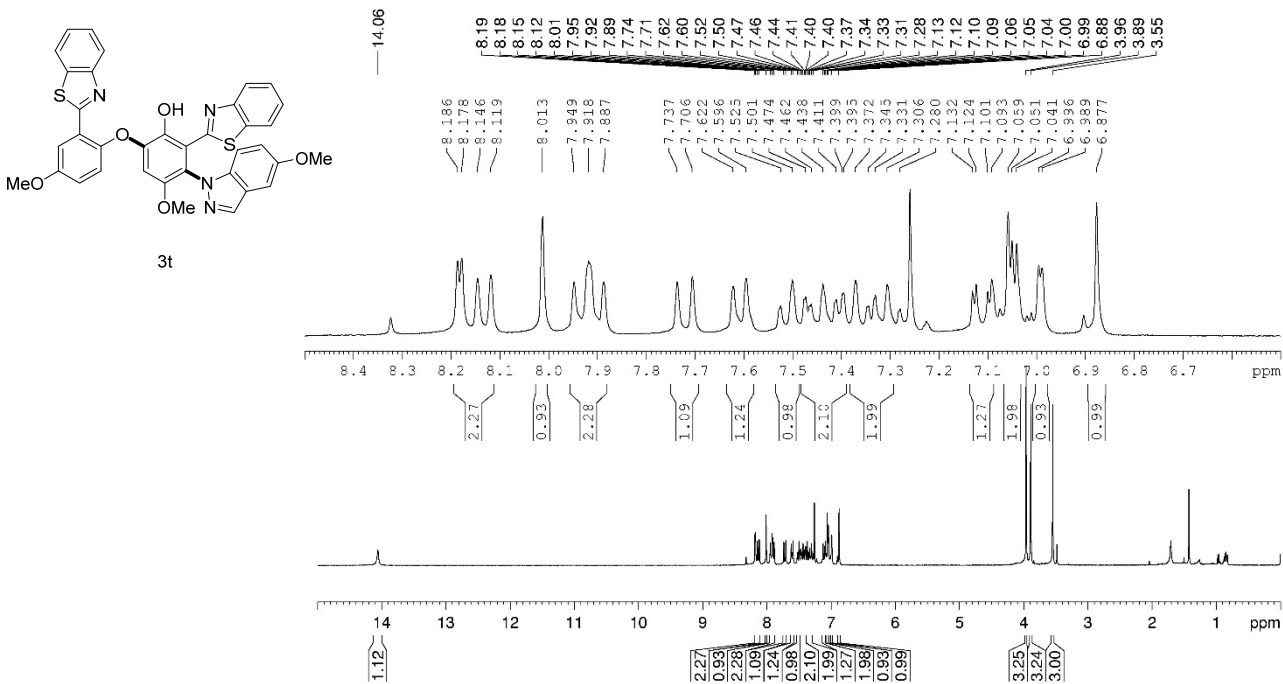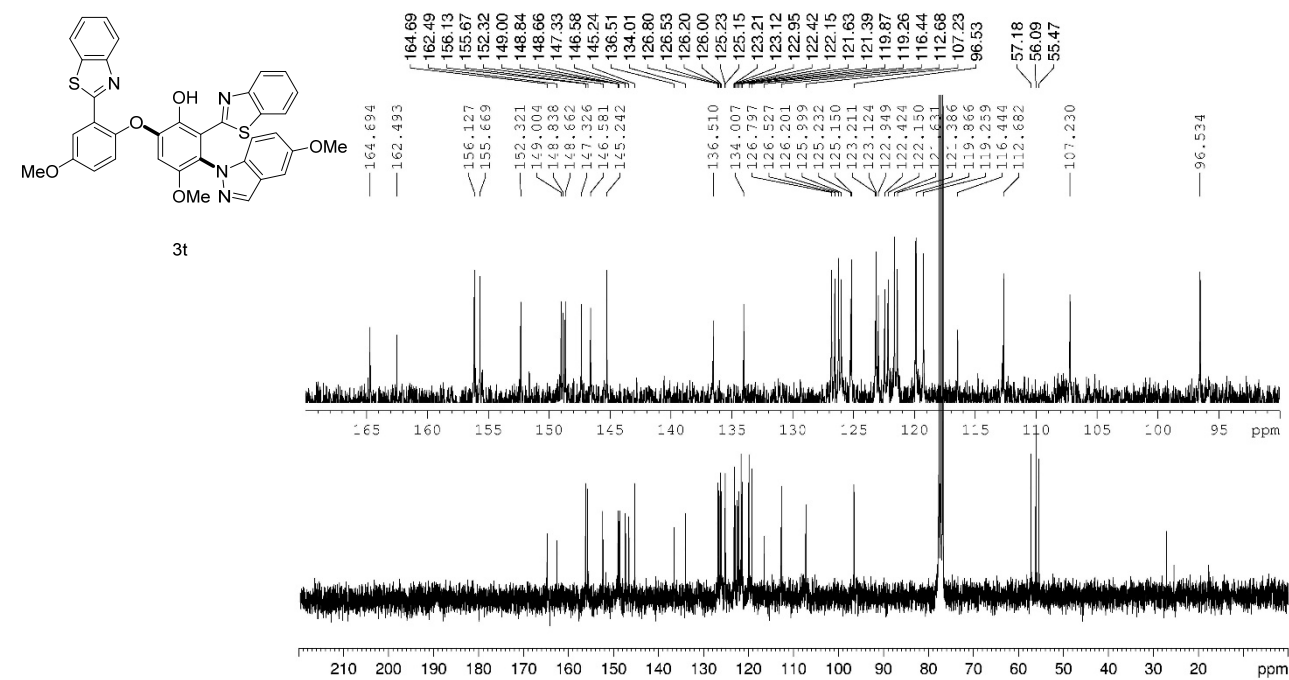





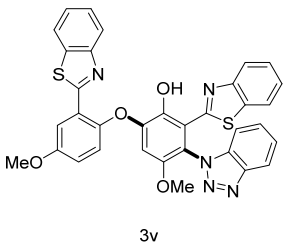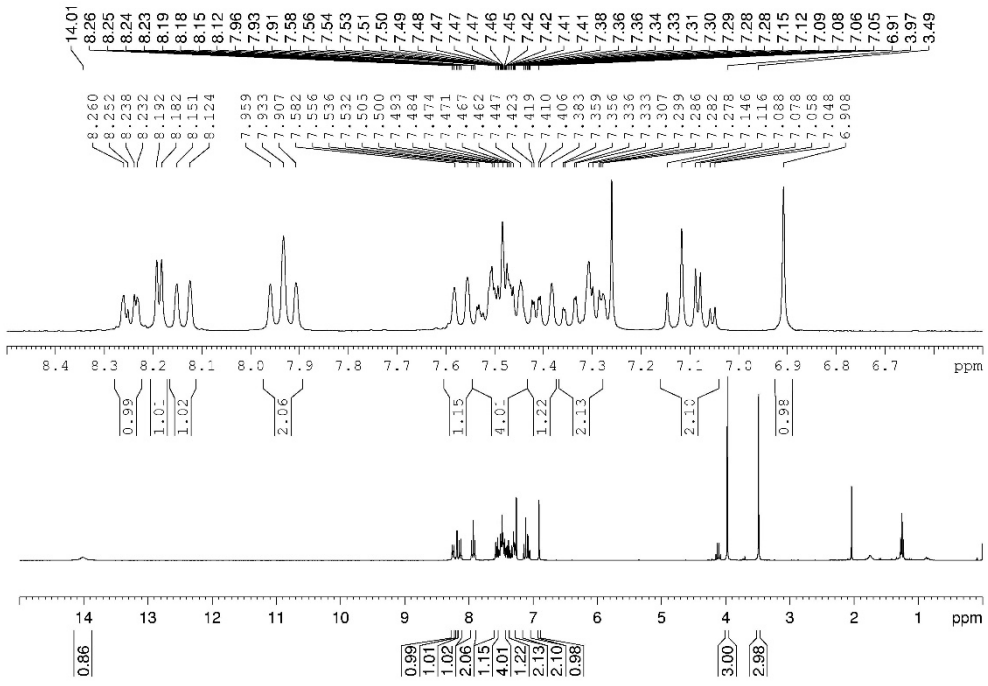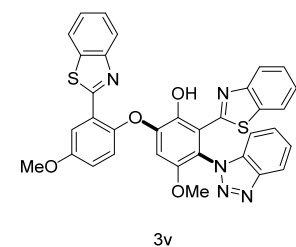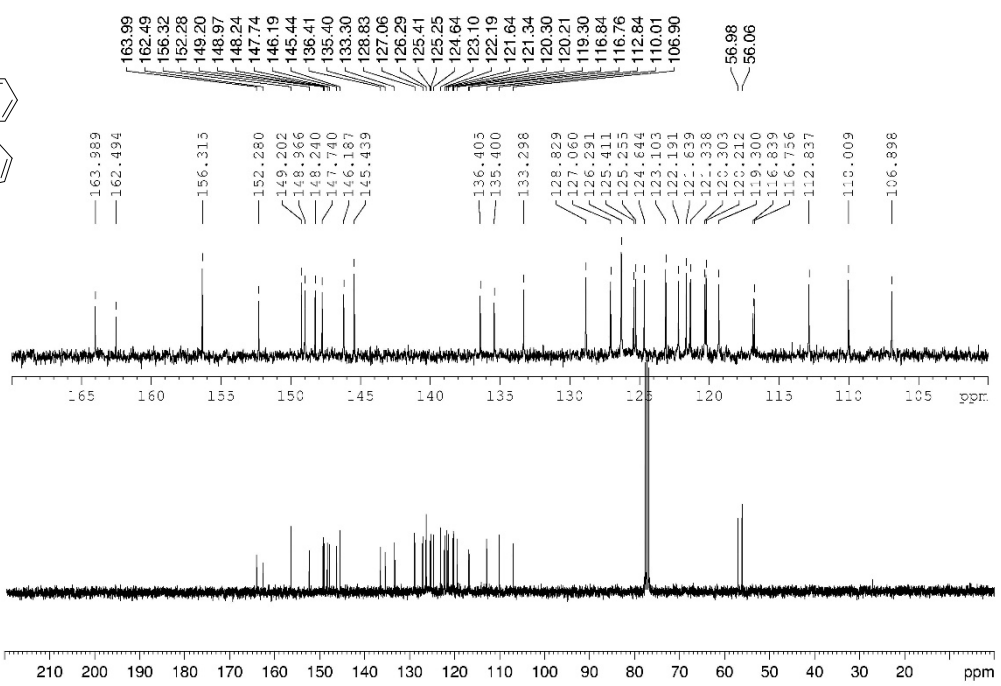

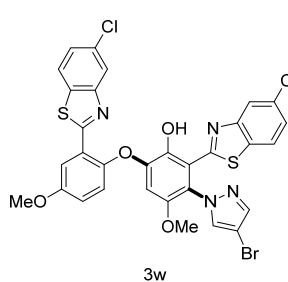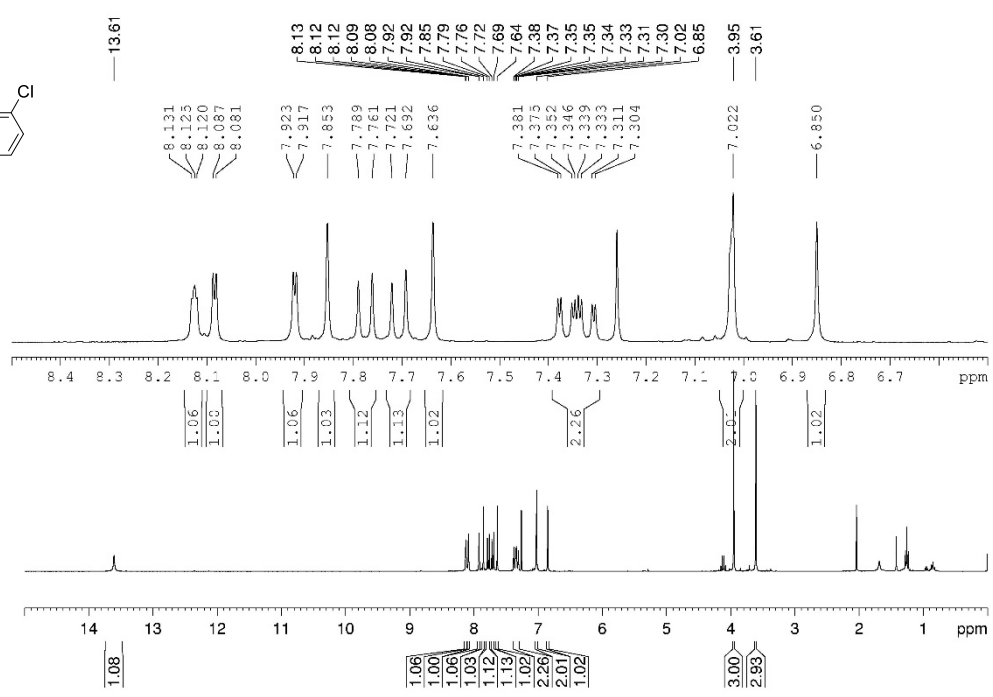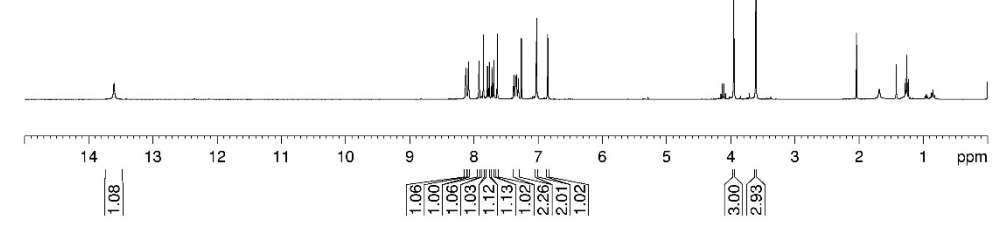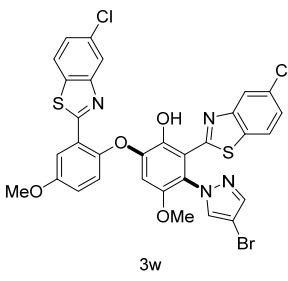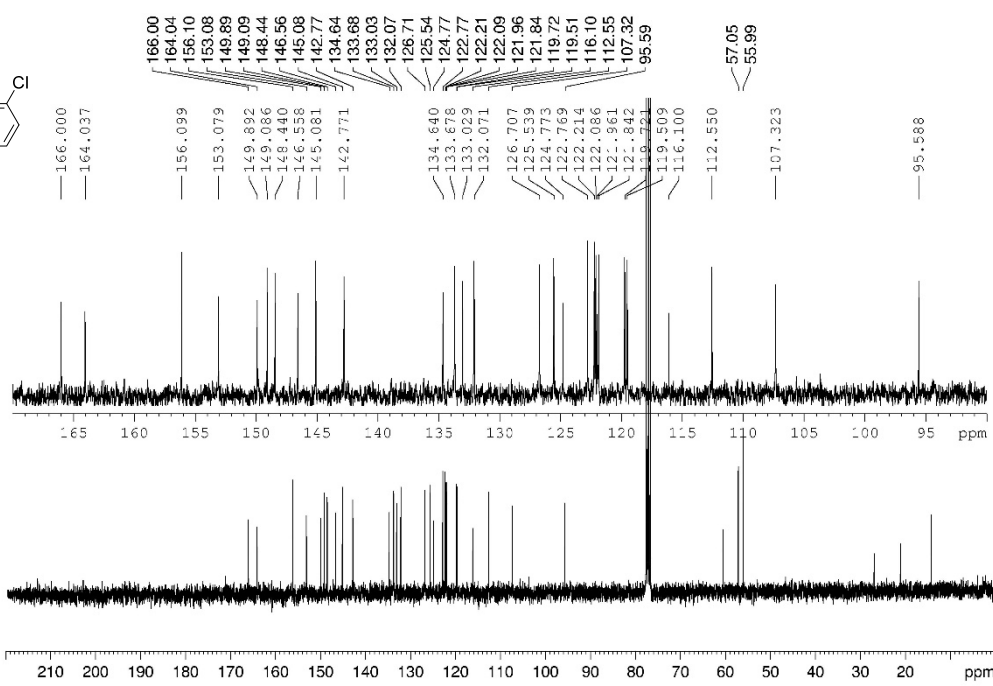

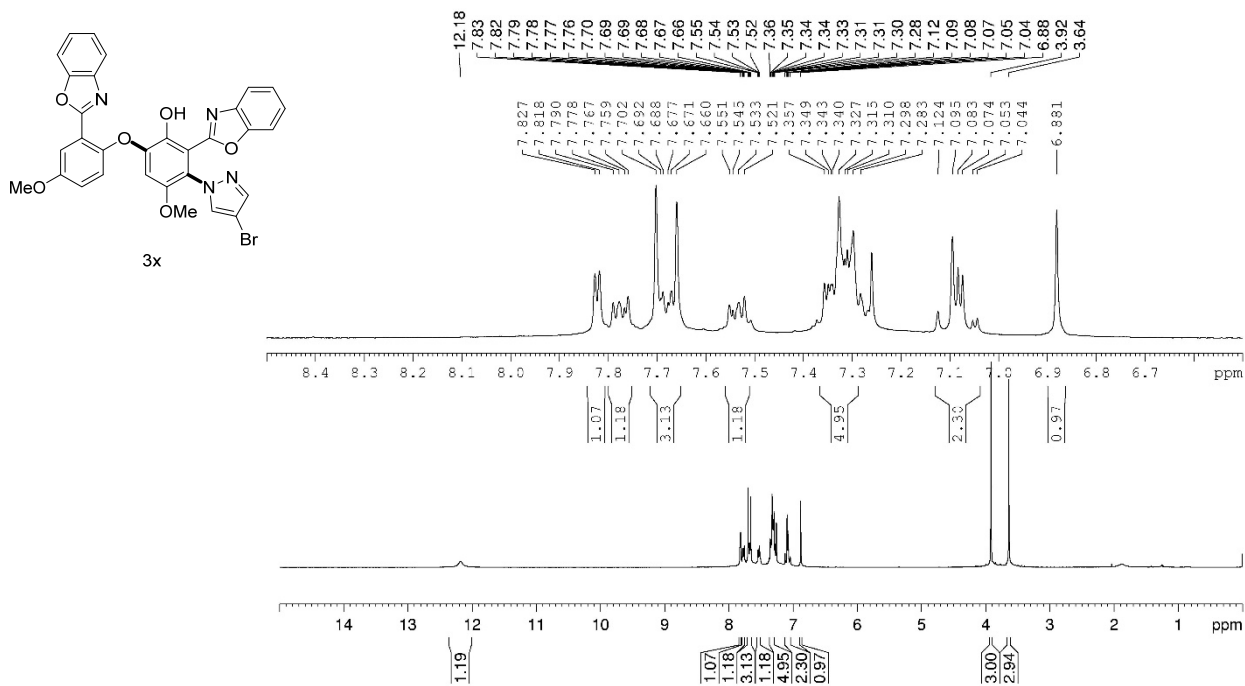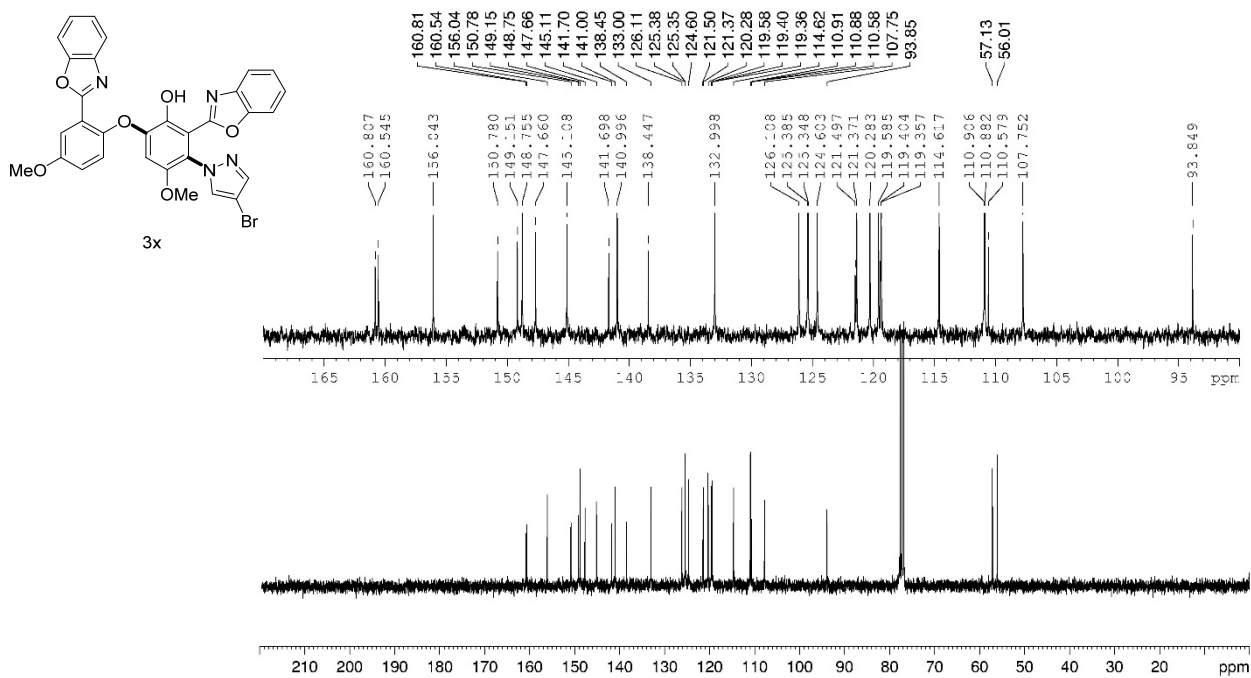

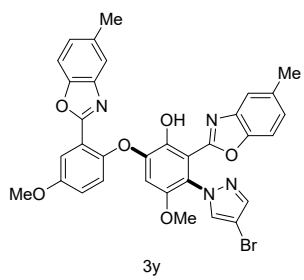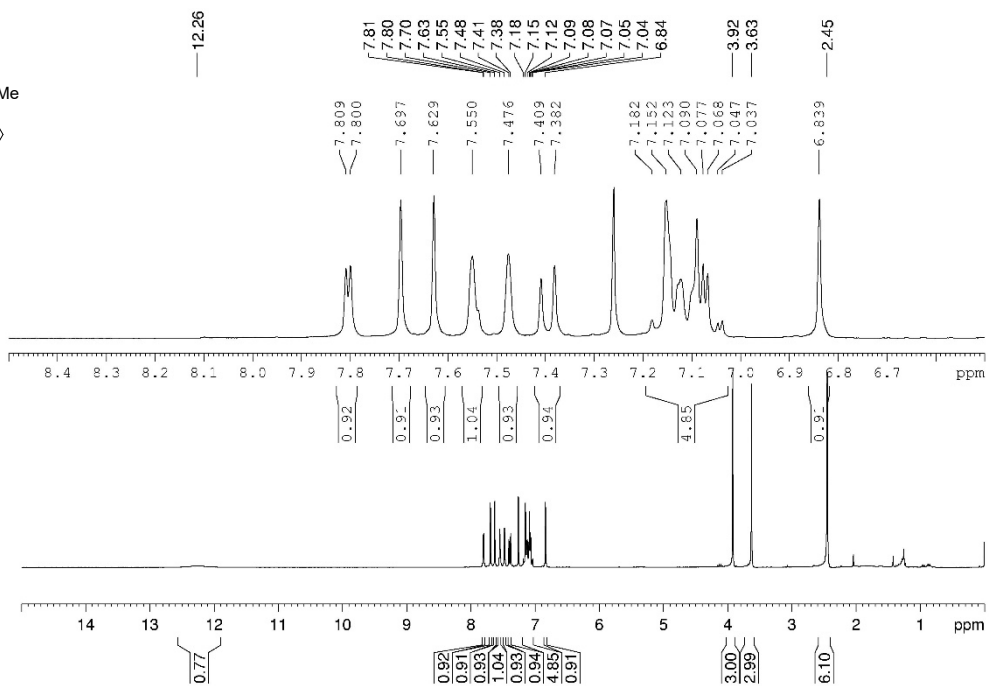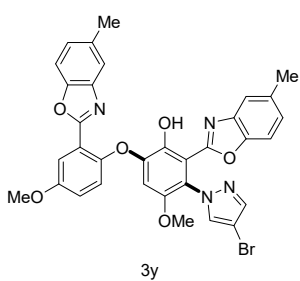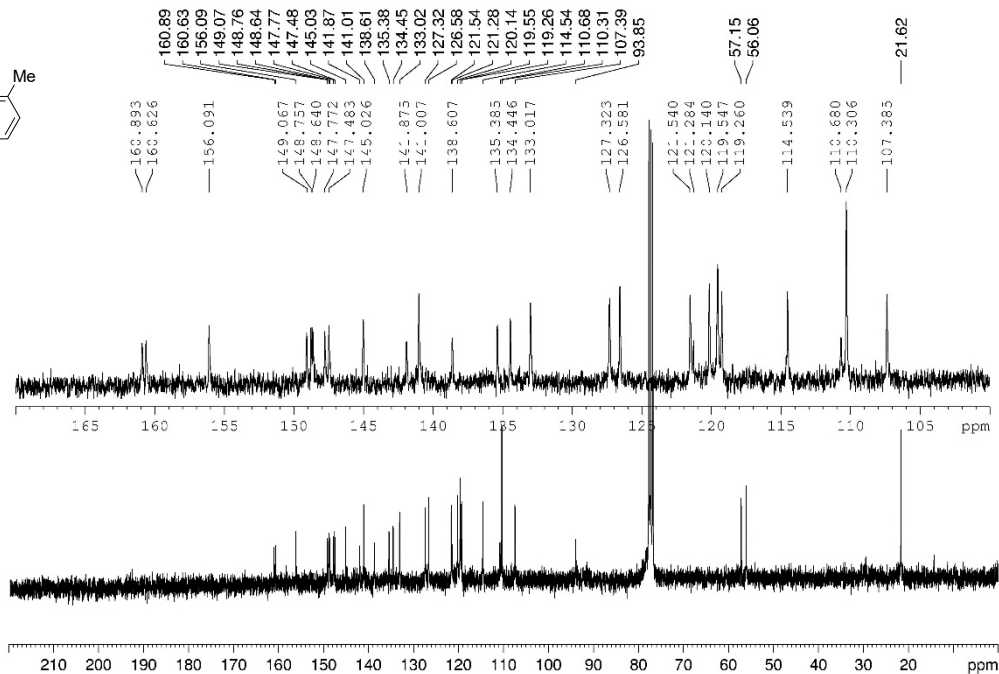

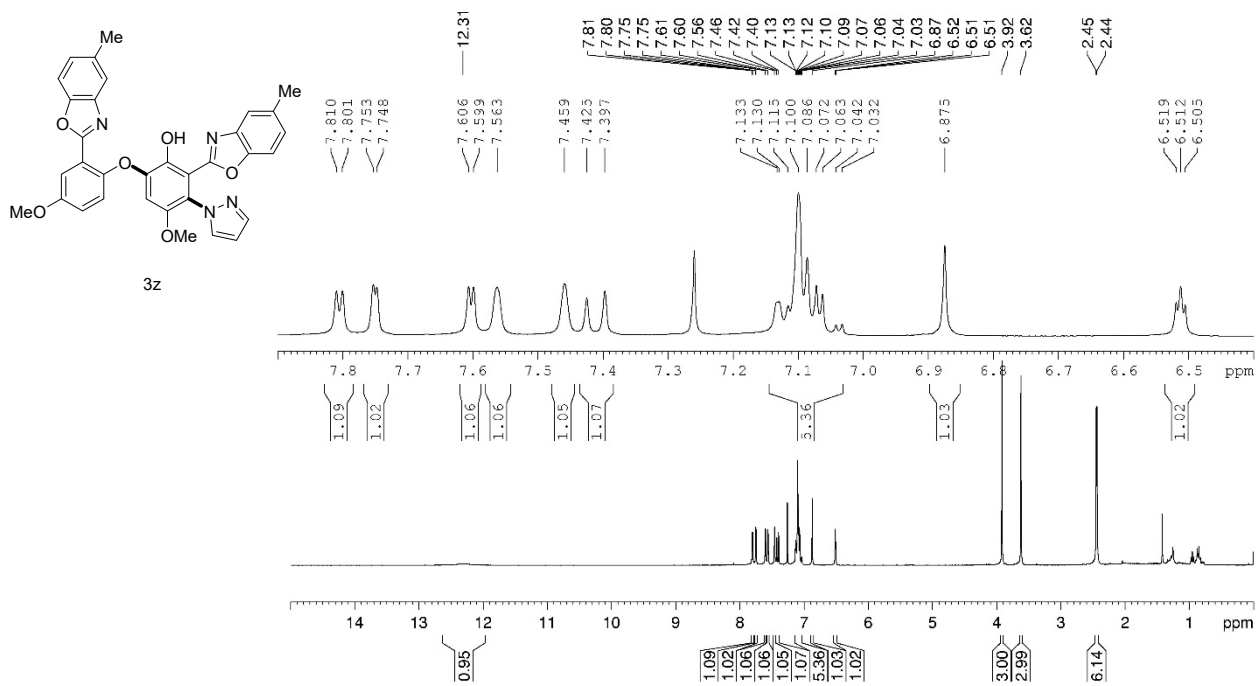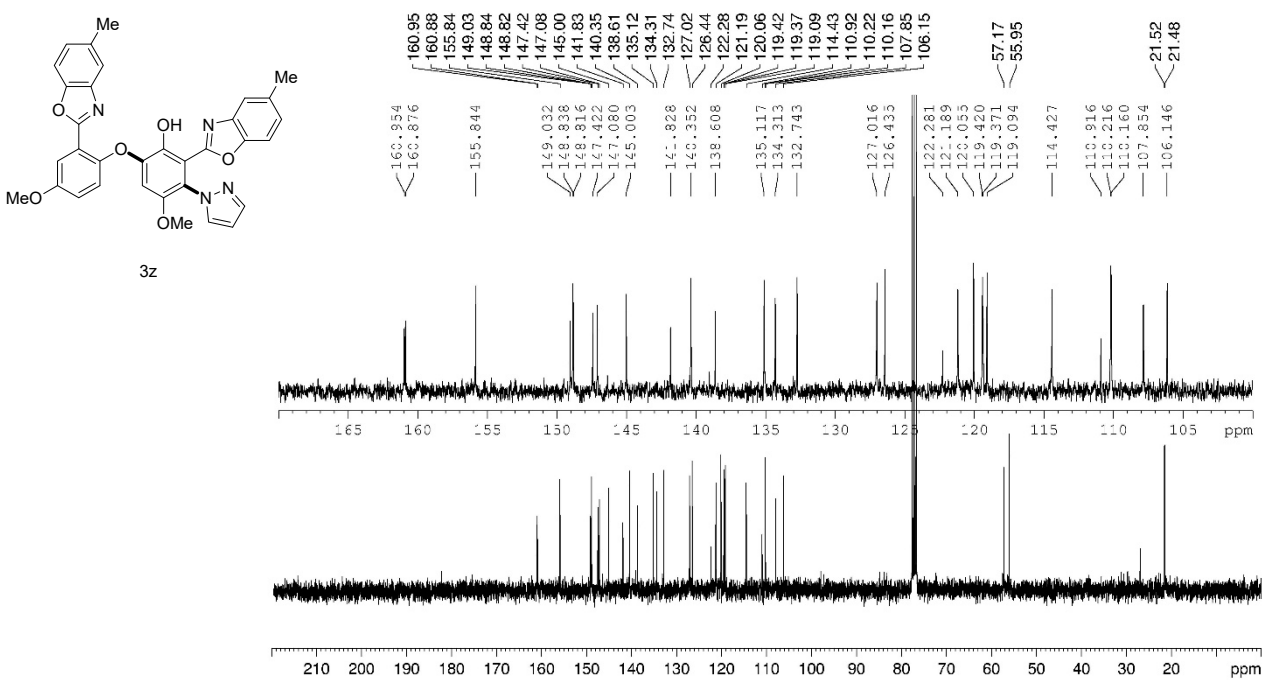

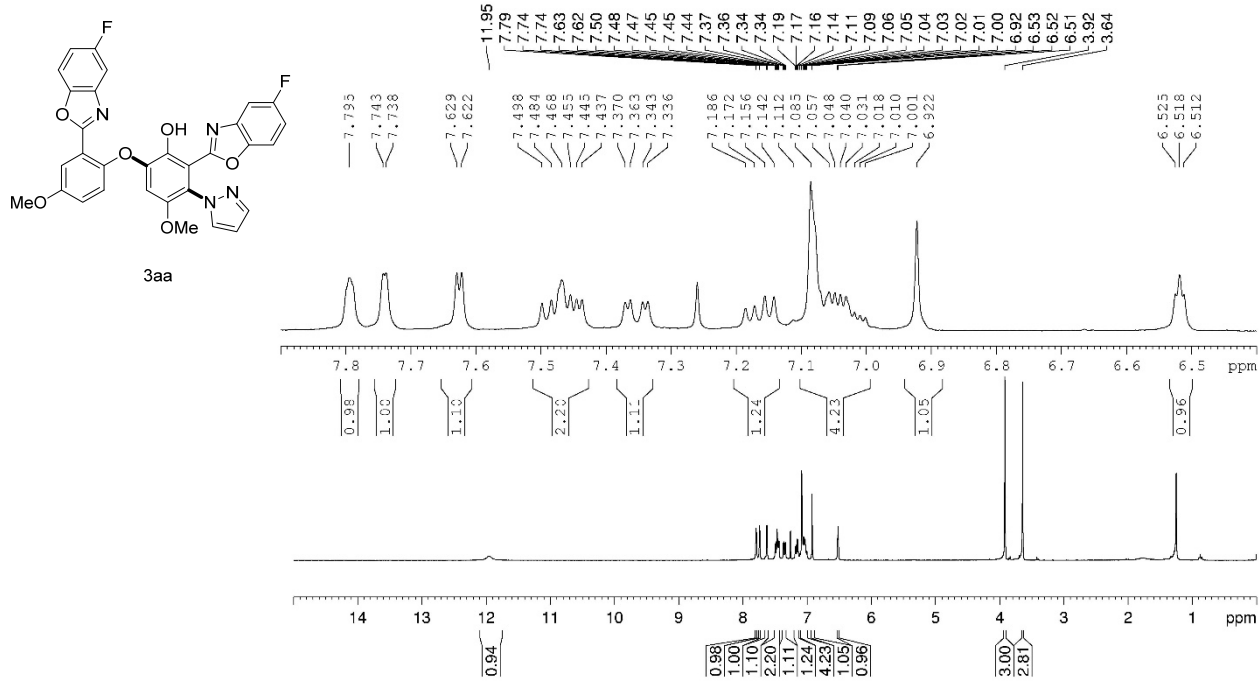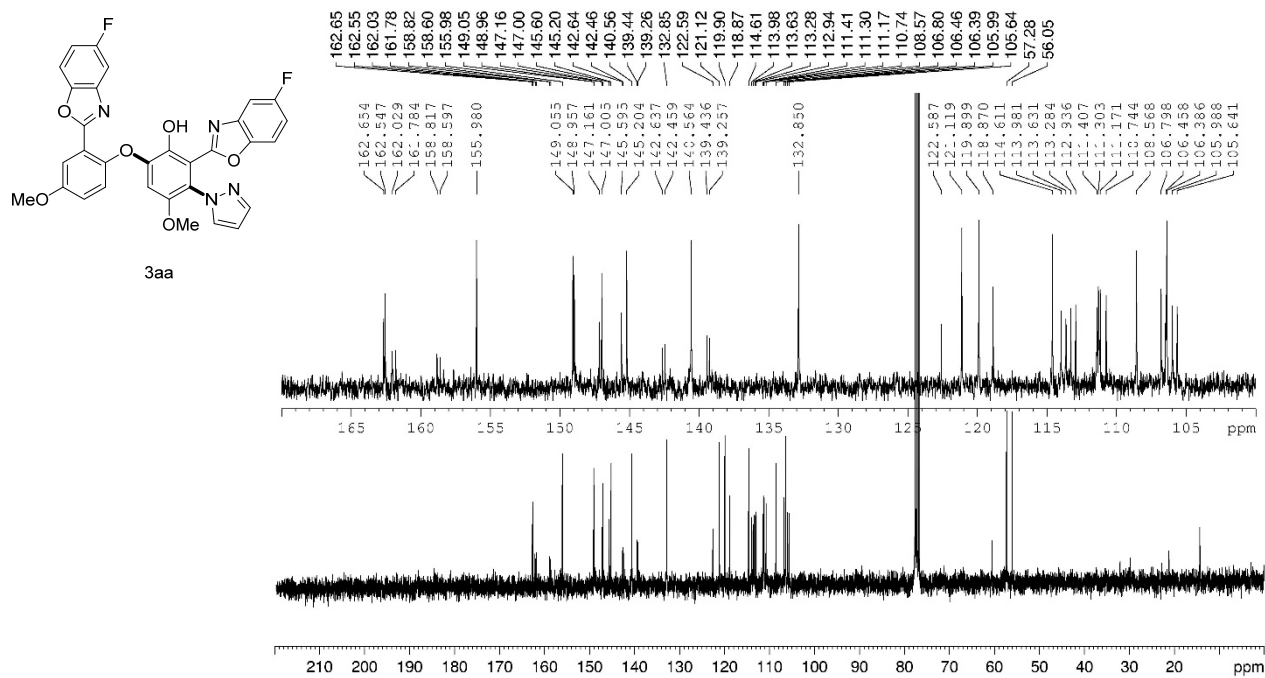

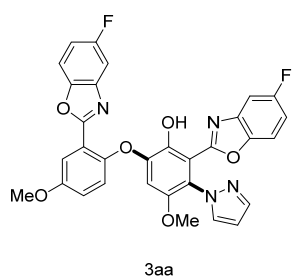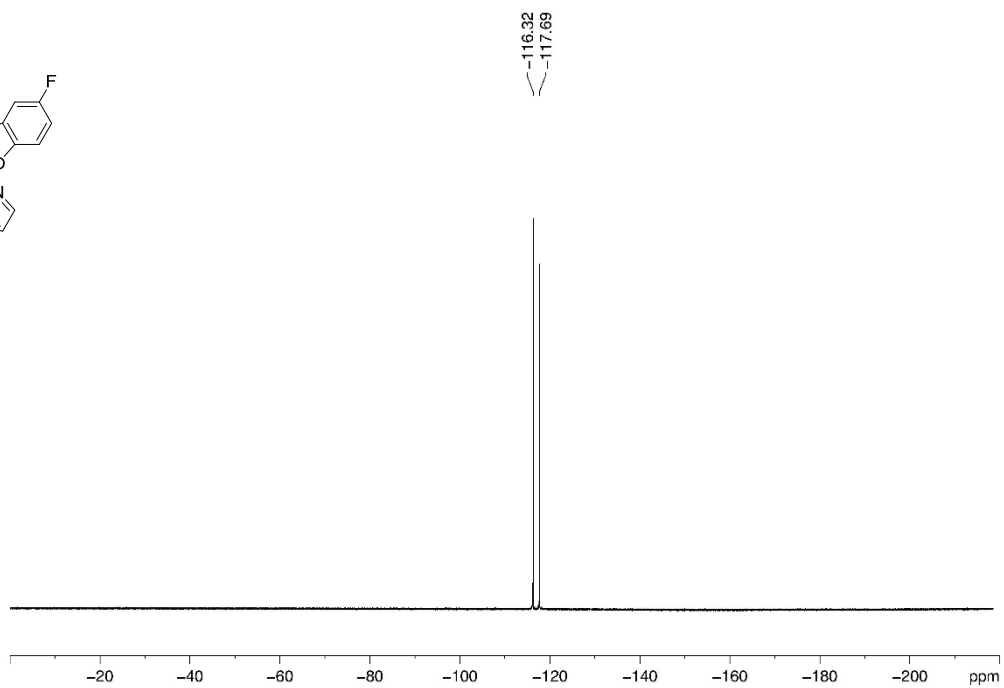



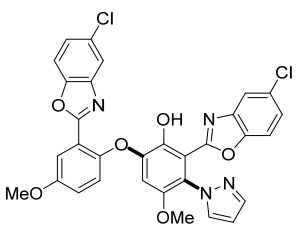

3ab

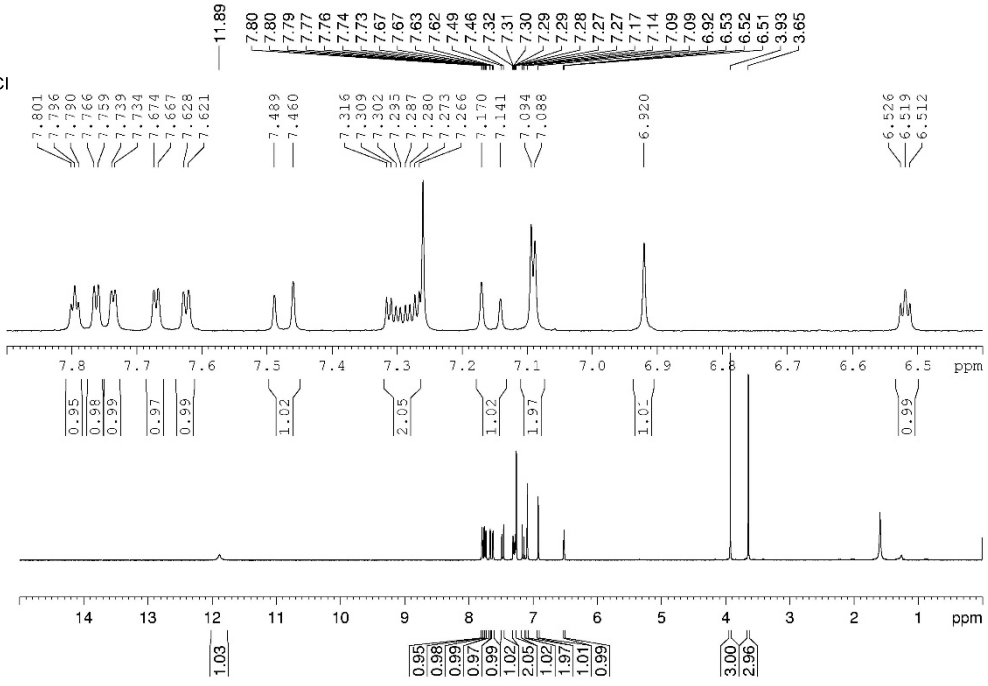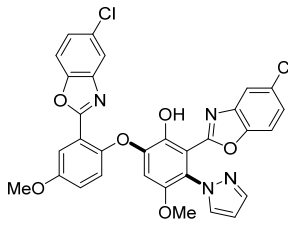

3ab

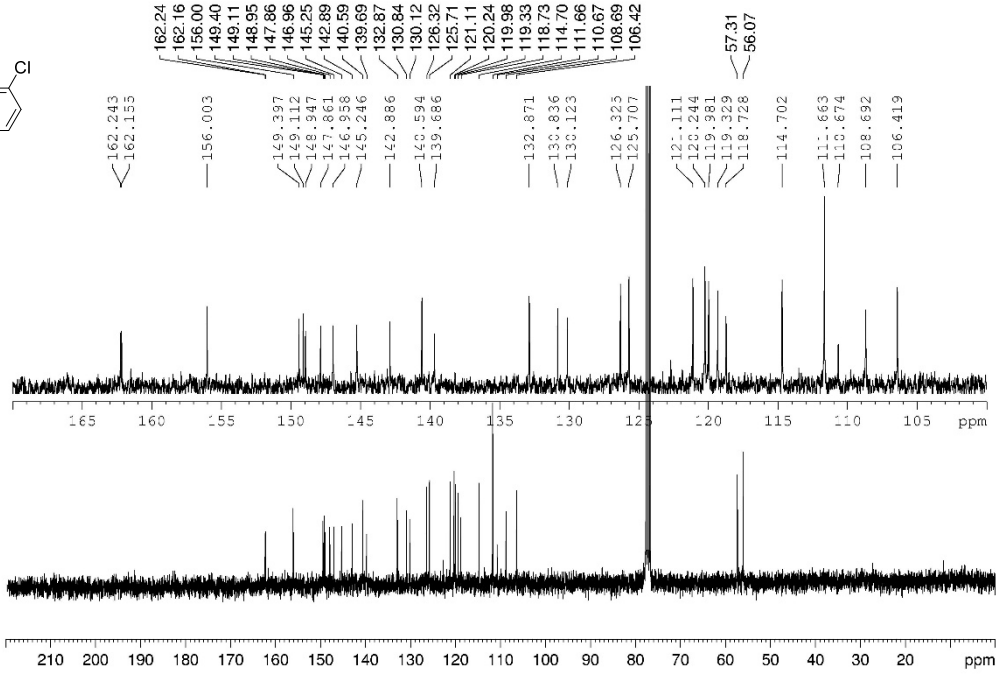

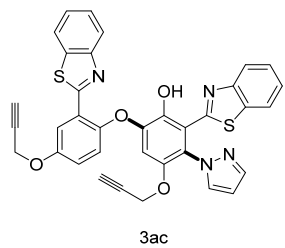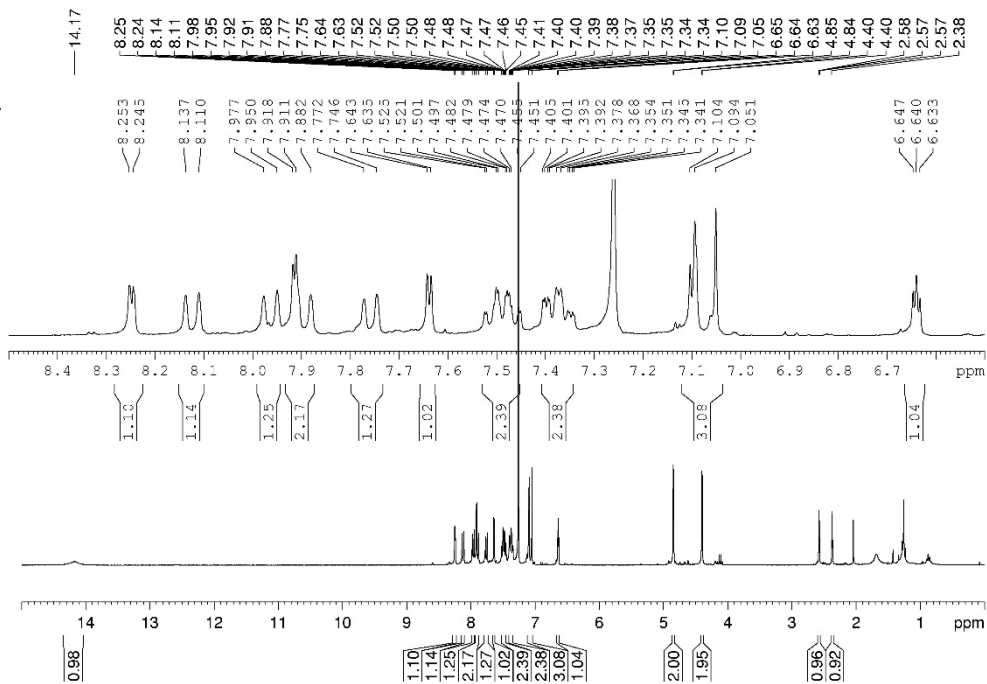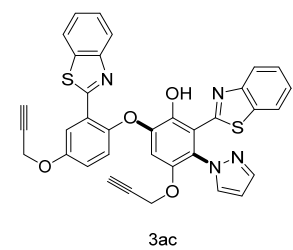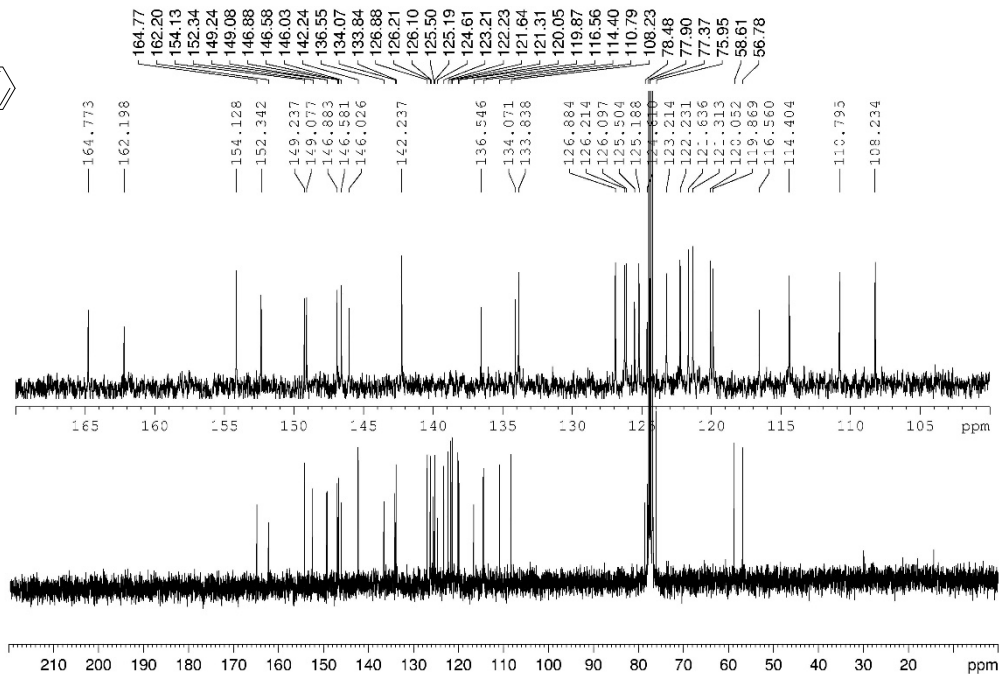



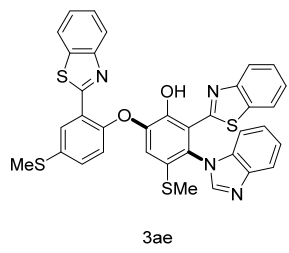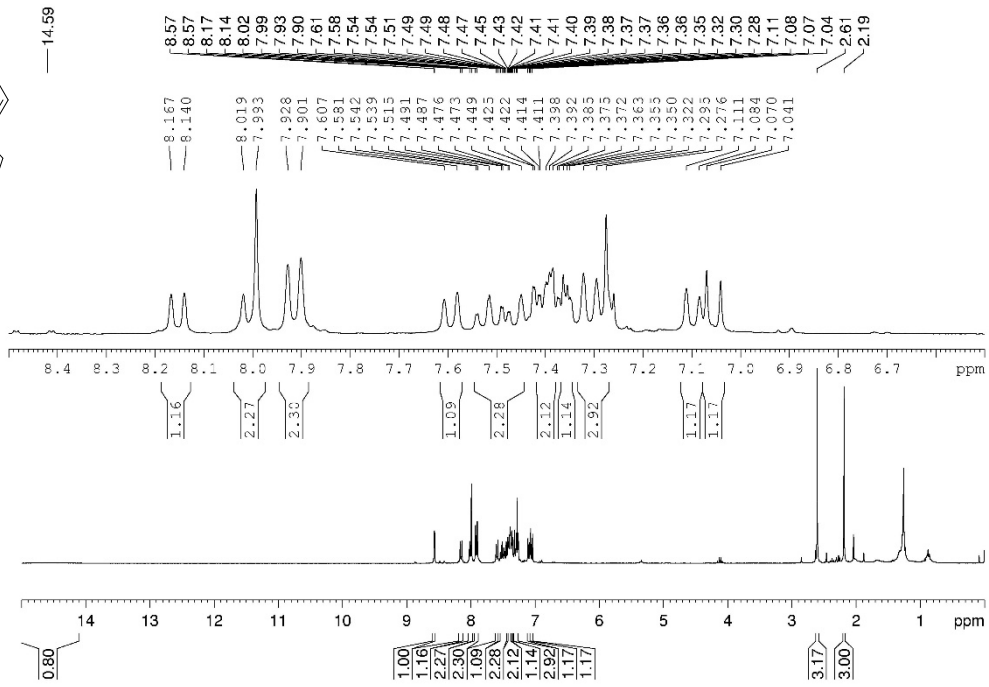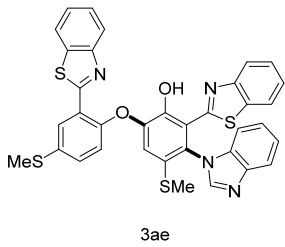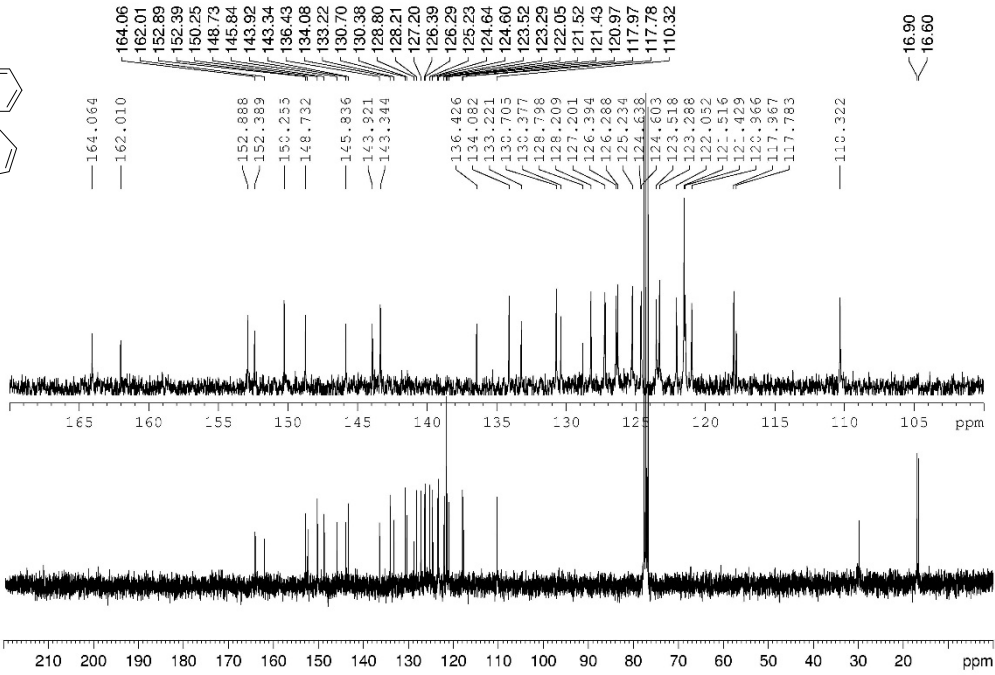

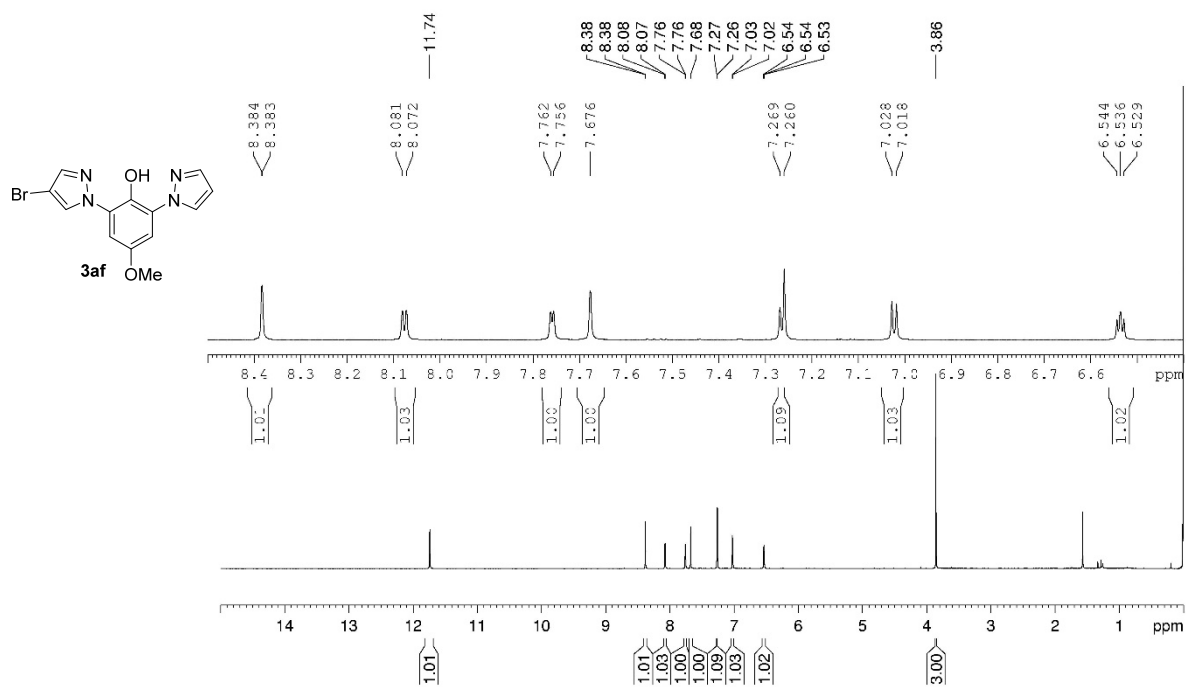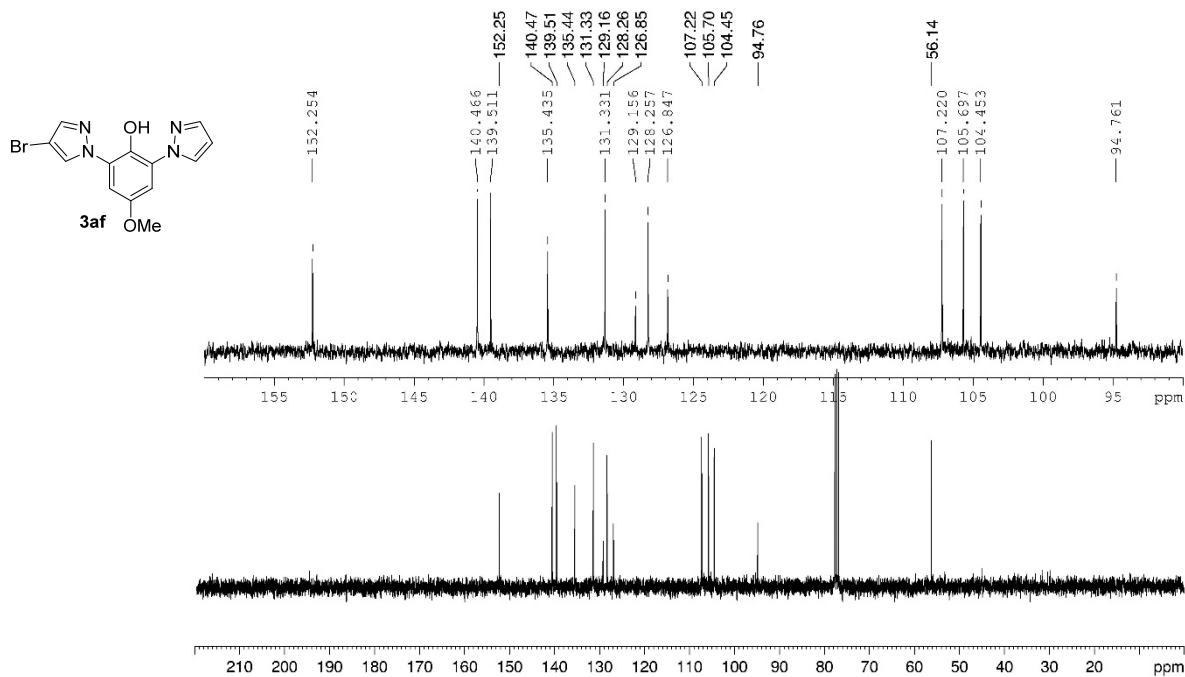

Supplement: d3gc00124e1.pdf [file d3gc00124e1.pdf]
